# Supplementary material for: Electrochemical synthesis of selenyl imidazo[2,1- b ]thiazinones via three-component reactions
Source: Royal Society of Chemistry journal article supplement (doi:10.1039/d4qo01354a), 2024-01-01
Supplement: d4qo01354a1.pdf [file d4qo01354a1.pdf]

## Supporting Information

### Electrochemical synthesis of selenyl imidazo[2,1-*b*]thiazinones *via* three-component reactions

Yuancheng Yue<sup>‡a</sup>, Ziren Chen<sup>‡a</sup>, Fei Xue<sup>a</sup>, Bin Wang<sup>a</sup>, Yonghong Zhang<sup>a</sup>, Yu Xia<sup>a</sup>, Shaofeng Wu<sup>a</sup>, Weiwei Jin<sup>b</sup>, and Chenjiang Liu<sup>\*a</sup>

<sup>a</sup> Urumqi Key Laboratory of Green Catalysis and Synthesis Technology, Key Laboratory of Oil and Gas Fine Chemicals, Ministry of Education & Xinjiang Uygur Autonomous Region, State Key Laboratory of Chemistry and Utilization of Carbon Based Energy Resources, College of Chemistry, Xinjiang University, Urumqi, 830017, Xinjiang, P. R. China.

<sup>b</sup> Key Laboratory of Specialty Agri-Product Quality and Hazard Controlling Technology of Zhejiang Province, College of Life Sciences, China Jiliang University, Hangzhou 310018, P. R. China.

\*E-mail: pxylcj@126.com

‡These authors contributed equally to this work.

### Table of Contents

|                                                        |     |
|--------------------------------------------------------|-----|
| 1. General Information                                 | S2  |
| 2. Experimental Procedures                             | S3  |
| 2.1 General procedure for the synthesis of diselenides | S3  |
| 2.2 General procedure for the synthesis of products    | S3  |
| 2.3 Optimization of reaction conditions                | S3  |
| 3. Mechanistic studies                                 | S6  |
| 3.1 Cyclic voltammetry experiments                     | S6  |
| 3.2 Radical trapping experiments                       | S7  |
| 3.3 Deuterium labeling experiment                      | S7  |
| 4. Analytical data                                     | S8  |
| 5. References                                          | S23 |
| 6. Copies of NMR spectra                               | S24 |
| 7. X-Ray crystallographic data for <b>4a</b>           | S57 |

## 1. General Information

The  $^1\text{H}$  NMR,  $^{13}\text{C}$  NMR and  $^{19}\text{F}$  NMR spectra were recorded on a Bruker AVANCE NEO-600 (600 MHz, 150 MHz and 565 MHz respectively) NMR spectrometer.  $^1\text{H}$  and  $^{13}\text{C}$  NMR chemical shifts were determined relative to internal standard  $\text{CDCl}_3$  ( $\delta$  ( $^1\text{H}$ ), 7.26 ppm;  $\delta$  ( $^{13}\text{C}$ ), 77.16 ppm). Chemical shifts ( $\delta$ ) were reported as parts per million (ppm) downfield from tetramethylsilane and the following abbreviations were used to identify the multiplicities: s = singlet, d = doublet, t = triplet, q = quartet, sept = septet, m = multiplet, dd = doublet of doublets and all combinations thereof can be explained by their integral parts. Coupling constant ( $J$ ) was reported in hertz unit (Hz). Melting point (m.p.) was recorded on BÜCHI (M-560). High-resolution mass spectra (HRMS) were recorded on a Thermo Fisher Scientific Q-Exactive (ESI-Orbitrap). Cyclic voltammetry (CV) was carried out on a CHI660E electrochemical workstation (CH Instruments, INS). Analytical thin layer chromatography (TLC) was performed on 0.25 mm silica gel 60 F254 plates and viewed by UV light (254 nm). Column chromatographic purification was performed using 200-300 mesh silica gel.

**Materials.** All commercial reagents and solvents were purchased from commercial sources and used as received unless otherwise indicated.

## 2 Experimental Procedures

### 2.1 General procedure for the synthesis of diselenides

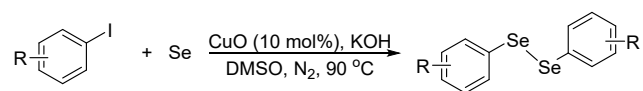

According to the literature<sup>[1]</sup>, we have prepared a series of diselenide compounds. To a stirred solution of Se<sup>0</sup> powder (156 mg, 2.0 mmol) and iodobenzene (204 mg, 1.0 mmol) in dry DMSO (2.0 mL) was added CuO (10 mol%) followed by KOH (112 mg, 2.0 mmol) under nitrogen atmosphere at 90 °C for 2 h. The progress of the reaction was monitored by TLC. After the reaction was complete, the reaction mixture was allowed to cool, which was subjected to column chromatographic separation to give pure diselenide.

### 2.2 General procedure for the synthesis of products (taking 4a as an example)

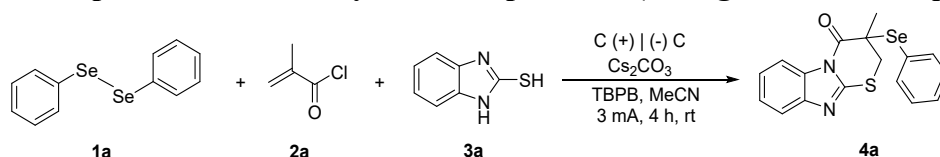

A mixture of diphenyl diselenide **1a** (15.6 mg, 0.05 mmol), methacryloyl chloride **2a** (42  $\mu$ L, 0.4 mmol), 2-mercaptobenzimidazole **3a** (30.0 mg, 0.2 mmol), TBPB (67.9 mg, 0.2 mmol), Cs<sub>2</sub>CO<sub>3</sub> (32.6 mg, 0.1 mmol) and CH<sub>3</sub>CN (4.0 mL), were added in an undivided bottle (10 mL). The bottle was equipped with graphite plates as anode and cathode. The resulting mixture was stirred and electrolyzed with constant current 3 mA at room temperature for 4 h. After the reaction finished, the resulting mixture were evaporated under reduced pressure. The resultant residue was purified by silica gel column chromatography (eluent: petroleum ether/EtOAc = 10:1, v/v) to afford the desired product **4a** in 90% yield.

### 2.3 Optimization of reaction conditions

**Table S1 Screening of solvents<sup>a</sup>**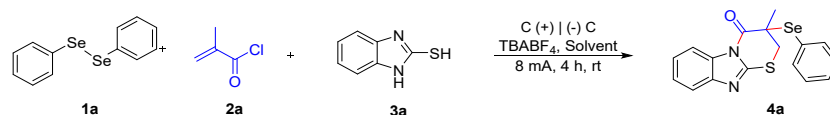

| Entry | Solvent | Yield (%) <sup>b</sup> |
|-------|---------|------------------------|
| 1     | MeCN    | 29                     |
| 2     | MeOH    | trace                  |
| 3     | DMF     | 7                      |
| 4     | DMSO    | trace                  |
| 5     | DCE     | 24                     |
| 6     | NMP     | N.D.                   |

<sup>a</sup> Reaction conditions: **1a** (0.2 mmol), **2a** (0.4 mmol), **3a** (0.2 mmol), TBABF<sub>4</sub> (0.2 mmol), solvent (4 mL), C (15 mm×10 mm×1 mm) cathode, C plate (15 mm×10 mm×1 mm) anode, undivided cell, current = 8 mA, rt, 4 h. <sup>b</sup> Isolated yields. N.D. = not detected

**Table S2 Screening of electrolytes<sup>a</sup>**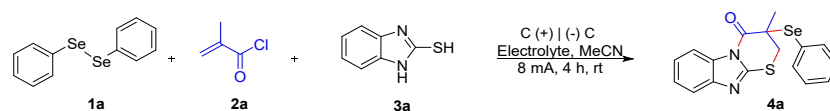

| Entry | Electrolyte                        | Yield (%) <sup>b</sup> |
|-------|------------------------------------|------------------------|
| 1     | TBAI                               | 26                     |
| 2     | TBAClO <sub>4</sub>                | 37                     |
| 3     | TBAPF <sub>6</sub>                 | 32                     |
| 4     | TBAOAc                             | 29                     |
| 5     | Mg(ClO <sub>4</sub> ) <sub>2</sub> | 16                     |
| 6     | EMImClO <sub>4</sub>               | 35                     |
| 7     | TBAHSO <sub>4</sub>                | 11                     |
| 8     | TBPB                               | 46                     |
| 9     | EMImBF <sub>4</sub>                | 21                     |
| 10    | TBAOH                              | trace                  |

<sup>a</sup> Reaction conditions: **1a** (0.2 mmol), **2a** (0.4 mmol), **3a** (0.2 mmol), electrolyte (0.2 mmol), MeCN (4 mL), C (15 mm×10 mm×1 mm) cathode, C plate (15 mm×10 mm×1 mm) anode, undivided cell, current = 8 mA, rt, 4 h. <sup>b</sup> Isolated yields.

**Table S3 Screening of electrodes, times and currents<sup>a</sup>**

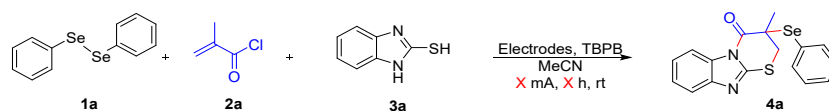

| Entry | Electrode       | Time (h) | Current (mA) | Yields (%) <sup>b</sup> |
|-------|-----------------|----------|--------------|-------------------------|
| 1     | C (+)   C (-)   | 4        | 8            | 46                      |
| 2     | C (+)   Ni (-)  | 4        | 8            | 26                      |
| 3     | C (+)   Pt (-)  | 4        | 8            | 34                      |
| 4     | Pt (+)   Pt (-) | 4        | 8            | 36                      |
| 5     | Ni (+)   Pt (-) | 4        | 8            | trace                   |
| 6     | C (+)   C (-)   | 3        | 8            | 33                      |
| 7     | C (+)   C (-)   | 5        | 8            | 25                      |
| 8     | C (+)   C (-)   | 4        | 2            | 47                      |
| 9     | C (+)   C (-)   | 4        | 3            | 54                      |
| 10    | C (+)   C (-)   | 4        | 4            | 44                      |

<sup>a</sup> Reaction conditions: **1a** (0.2 mmol), **2a** (0.4 mmol), **3a** (0.2 mmol), TBPB (0.2 mmol), MeCN (4 mL), cathode, anode, undivided cell, constant current, rt. <sup>b</sup> Isolated yields.

**Table S4 Screening of bases<sup>a</sup>**

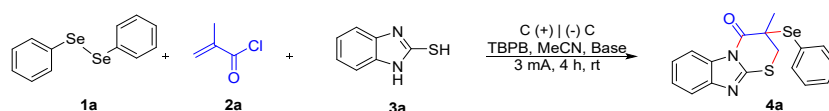

| Entry | Base (mmol)                     | Yields (%) <sup>b</sup> |
|-------|---------------------------------|-------------------------|
| 1     | TEA                             | 35                      |
| 2     | Py                              | 24                      |
| 3     | Cs <sub>2</sub> CO <sub>3</sub> | 61                      |
| 4     | DMAP                            | 44                      |
| 5     | DBU                             | 42                      |
| 6     | TBD                             | 37                      |
| 7     | <sup>t</sup> BuOK               | 34                      |
| 8     | <sup>t</sup> BuONa              | 26                      |
| 9     | K <sub>2</sub> CO <sub>3</sub>  | 53                      |
| 10    | CsCl                            | 52                      |
| 11    | CsF                             | 58                      |

<sup>a</sup> Reaction conditions: **1a** (0.2 mmol), **2a** (0.4 mmol), **3a** (0.2 mmol), TBPB (0.2 mmol), base (0.2 mmol), MeCN (4 mL), C (15 mm×10 mm×1 mm) cathode, C plate (15 mm×10 mm×1 mm) anode, undivided cell, current = 3 mA, rt, 4 h. <sup>b</sup> Isolated yields.

**Table S5 Screening of reaction ratio<sup>a</sup>**

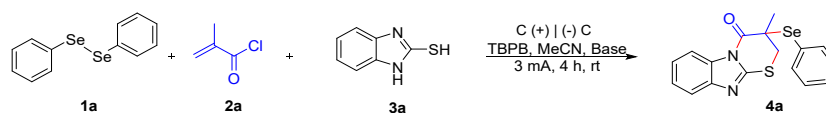

| Entry | 1a (mmol) | 3a (mmol) | Cs <sub>2</sub> CO <sub>3</sub> (mmol) | TBPB (mmol) | Yields (%) <sup>b</sup> |
|-------|-----------|-----------|----------------------------------------|-------------|-------------------------|
| 1     | 0.1       | 0.2       | 0.2                                    | 0.2         | 39                      |
| 2     | 0.09      | 0.2       | 0.2                                    | 0.2         | 54                      |
| 3     | 0.08      | 0.2       | 0.2                                    | 0.2         | 57                      |
| 4     | 0.07      | 0.2       | 0.2                                    | 0.2         | 60                      |
| 5     | 0.06      | 0.2       | 0.2                                    | 0.2         | 63                      |
| 6     | 0.05      | 0.2       | 0.2                                    | 0.2         | 85                      |
| 7     | 0.05      | 0.2       | 0.18                                   | 0.2         | 49                      |
| 8     | 0.05      | 0.2       | 0.16                                   | 0.2         | 49                      |
| 9     | 0.05      | 0.2       | 0.14                                   | 0.2         | 81                      |
| 10    | 0.05      | 0.2       | 0.12                                   | 0.2         | 81                      |
| 11    | 0.05      | 0.2       | 0.1                                    | 0.2         | 90                      |
| 12    | 0.05      | 0.2       | 0.08                                   | 0.2         | 73                      |
| 13    | 0.05      | 0.2       | 0.1                                    | 0.15        | 69                      |
| 14    | 0.05      | 0.2       | 0.1                                    | 0.1         | 52                      |
| 15    | 0.05      | 0.15      | 0.1                                    | 0.2         | 76                      |
| 16    | 0.05      | 0.1       | 0.1                                    | 0.2         | 50                      |

<sup>a</sup> Reaction conditions: **1a** (X mmol), **2a** (0.4 mmol), **3a** (X mmol), TBPB (X mmol), Cs<sub>2</sub>CO<sub>3</sub> (X mmol), MeCN (4 mL), C (15 mm×10 mm×1 mm) cathode, C plate (15 mm×10 mm×1 mm) anode, undivided cell, current = 3 mA, rt, 4 h. <sup>b</sup> Isolated yields.

### 3 Mechanistic studies

#### 3.1 Cyclic voltammetry experiments

Cyclic voltammograms were recorded with a CHI660E electrochemical workstation at room temperature in MeCN. Scan rate 0.05 V/s, ranging from -1 V-1.7 V, a glassy carbon-disk (R = 5.5 mm, h = 10 mm) was used as the working electrode. The Pt disk (R = 5.5 mm, h = 10 mm) and Ag/AgCl (R = 5.0 mm, h = 10 mm) was used as counter and reference electrode, respectively. A: MeCN (4 mL) + TBPB (0.2 mmol) + Cs<sub>2</sub>CO<sub>3</sub> (0.1 mmol); b: MeCN (4 mL) + TBPB (0.2 mmol) + Cs<sub>2</sub>CO<sub>3</sub> (0.1 mmol) + **1a** (0.2 mmol).

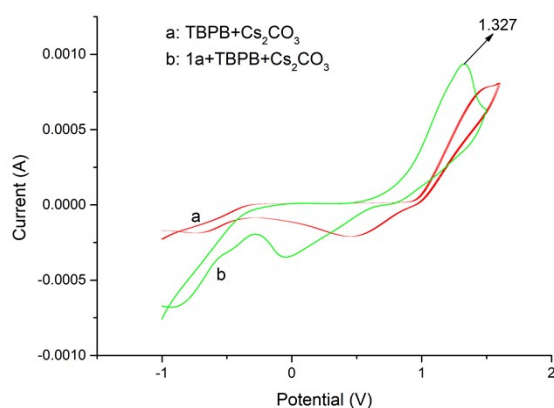

Fig. S1 Cyclic voltammetry experiments

### 3.2 Radical trapping experiments<sup>a</sup>

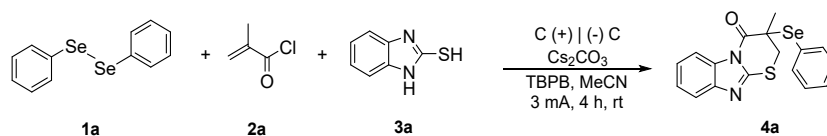

| Entry | Radical scavenger (mmol) | Yield of 4a (%) <sup>b</sup> |
|-------|--------------------------|------------------------------|
| 1     | none                     | 90                           |
| 2     | TEMPO (0.8)              | 80                           |
| 3     | TEMPO (1.2)              | 54                           |
| 4     | BHT (0.8)                | 70                           |
| 5     | BHT (1.2)                | 65                           |
| 6     | DPE (0.8)                | 67                           |
| 7     | DPE (1.2)                | 60                           |

<sup>a</sup> Reaction conditions: **1a** (0.05 mmol), **2a** (0.4 mmol), **3a** (0.2 mmol), TBPB (0.2 mmol), Cs<sub>2</sub>CO<sub>3</sub> (0.2 mmol), MeCN (4 mL), C (15 mm×10 mm×1 mm) cathode, C plate (15 mm×10 mm×1 mm) anode, undivided cell, current = 3 mA, rt, 4 h. <sup>b</sup> Isolated yields.

### 3.2 Deuterium labeling study

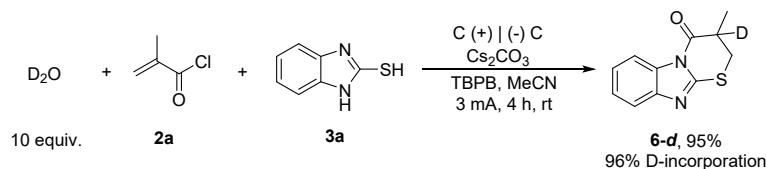

A mixture of D<sub>2</sub>O (36 μL, 2.0 mmol), methacryloyl chloride **2a** (42 μL, 0.4 mmol), **3a** (30.0 mg, 0.2 mmol), TBPB (67.9 mg, 0.2 mmol), Cs<sub>2</sub>CO<sub>3</sub> (32.6 mg, 0.1 mmol) and CH<sub>3</sub>CN (4.0 mL), were added in an undivided bottle (10 mL). The bottle was equipped with graphite plates as anode and cathode. The resulting mixture was stirred and electrolyzed with constant current 3 mA at room temperature for 4 h. After the reaction

finished, the resulting mixture were evaporated under reduced pressure. The resultant residue was purified by silica gel column chromatography (eluent: petroleum ether/EtOAc = 10:1, v/v) to afford the desired product **6-d** in 95% yield, D incorporation was determined by  $^1\text{H}$  NMR: 96%.

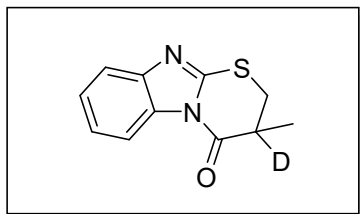

**3-Methyl-2,3-dihydro-4H-benzo[4,5]imidazo[2,1-b][1,3]thiazin-4-one-3-d (6-d):**  $^1\text{H}$  NMR ( $\text{CDCl}_3$ , 600 MHz)  $\delta$  8.19-8.18 (m, 1H), 7.59-7.58 (m, 1H), 7.33 (td,  $J = 7.5, 1.3$  Hz, 1H), 7.28 (td,  $J = 8.0, 1.3$  Hz, 1H), 3.23 (d,  $J = 1.3$  Hz, 2.04H), 1.52 (s, 3H).  $^{13}\text{C}$  NMR ( $\text{CDCl}_3$ , 150 MHz)  $\delta$  169.9, 150.8, 143.1, 132.8, 125.6, 124.6, 118.6, 115.5, 39.1 (t,  $J = 21$  Hz), 31.0, 15.3. HRMS (APCI)  $m/z$  calcd for  $\text{C}_{11}\text{H}_{10}\text{DN}_2\text{OS}$   $[\text{M}+\text{H}]^+$ : 220.0649; Found: 220.0644.

#### 4 Analytical data

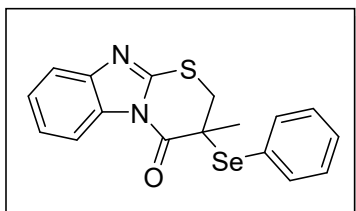

**3-Methyl-3-(phenylselanyl)-2,3-dihydro-4H-benzo[4,5]imidazo[2,1-b][1,3]thiazin-4-one (4a):** New compound, 33.7 mg, 90% yield. White solid, m.p.: 128.3-128.9 °C.  $^1\text{H}$  NMR ( $\text{CDCl}_3$ , 600 MHz)  $\delta$  8.21-8.20 (m, 1H), 7.62 (d,  $J = 7.8$  Hz, 1H), 7.53-7.51 (m, 2H), 7.41-7.38 (m, 1H), 7.36-7.34 (m, 1H), 7.32-7.28 (m, 3H), 3.79 (d,  $J = 14.0$  Hz, 1H), 3.35 (d,  $J = 13.9$  Hz, 1H), 1.70 (s, 3H).  $^{13}\text{C}$  NMR ( $\text{CDCl}_3$ , 150 MHz)  $\delta$  168.0, 149.7, 143.1, 138.4, 133.2, 130.1, 129.2, 125.4, 125.4, 124.6, 118.7, 115.6, 47.2, 37.8, 24.3. HRMS (ESI)  $m/z$  calcd for  $\text{C}_{17}\text{H}_{15}\text{N}_2\text{OSSe}$   $[\text{M}+\text{H}]^+$ : 375.0065; Found: 375.0058.



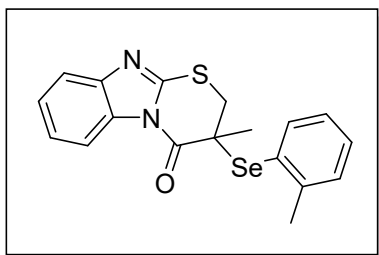

**3-Methyl-3-(*o*-tolylselanyl)-2,3-dihydro-4*H*-benzo[4,5]imidazo[2,1-*b*][1,3]thiazin-4-one (4b):** New compound, 29.2 mg, 75% yield. Pale yellow oil.  $^1\text{H}$  NMR ( $\text{CDCl}_3$ , 600 MHz)  $\delta$  8.20 (d,  $J = 7.9$  Hz, 1H), 7.63 (d,  $J = 7.8$  Hz, 1H), 7.51 (d,  $J = 7.6$  Hz, 1H), 7.36 (t,  $J = 7.3$  Hz, 1H), 7.32-7.28 (m, 3H), 7.10-7.08 (m, 1H), 3.84 (d,  $J = 13.9$  Hz, 1H), 3.39 (d,  $J = 13.9$  Hz, 1H), 2.37 (s, 3H), 1.69 (s, 3H).  $^{13}\text{C}$  NMR ( $\text{CDCl}_3$ , 150 MHz)  $\delta$  168.2, 149.8, 144.3, 143.2, 140.3, 133.3, 130.8, 130.6, 126.6, 126.5, 125.5, 124.7, 118.8, 115.6, 47.3, 38.1, 24.1, 23.5. HRMS (ESI)  $m/z$  calcd for  $\text{C}_{18}\text{H}_{17}\text{N}_2\text{OSse}$   $[\text{M}+\text{H}]^+$ : 389.0222; Found: 389.0218.

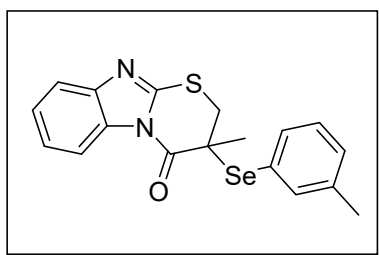

**3-Methyl-3-(*m*-tolylselanyl)-2,3-dihydro-4*H*-benzo[4,5]imidazo[2,1-*b*][1,3]thiazin-4-one (4c):** New compound, 31.1 mg, 80% yield. Pale yellow oil.  $^1\text{H}$  NMR ( $\text{CDCl}_3$ , 600 MHz)  $\delta$  8.20 (d,  $J = 8.0$  Hz, 1H), 7.62 (d,  $J = 7.7$ , 1H), 7.37-7.30 (m, 4H), 7.18-7.17 (m, 2H), 3.80 (d,  $J = 14.0$  Hz, 1H), 3.35 (d,  $J = 14.0$  Hz, 1H), 2.27 (s, 3H), 1.74 (s, 3H).  $^{13}\text{C}$  NMR ( $\text{CDCl}_3$ , 150 MHz)  $\delta$  168.1, 149.9, 143.1, 139.1, 139.0, 135.4, 133.2, 131.0, 129.0, 125.5, 125.2, 124.6, 118.7, 115.6, 47.3, 37.9, 24.5, 21.3. HRMS (ESI)  $m/z$  calcd for  $\text{C}_{18}\text{H}_{17}\text{N}_2\text{OSse}$   $[\text{M}+\text{H}]^+$ : 389.0222; Found: 389.0220.

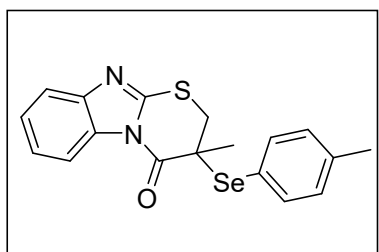

**3-Methyl-3-(*p*-tolylselanyl)-2,3-dihydro-4*H*-benzo[4,5]imidazo[2,1-*b*][1,3]thiazin-4-one (4d):** New compound, 37.0 mg, 95% yield. Pale yellow oil.  $^1\text{H}$  NMR ( $\text{CDCl}_3$ , 600 MHz)  $\delta$  8.21-8.20 (m, 1H), 7.62-7.61 (m, 1H), 7.40-7.39 (m, 2H), 7.36-7.34 (m, 1H), 7.32-7.29 (m, 1H), 7.10 (d,  $J = 7.7$  Hz, 2H), 3.79 (d,  $J = 13.9$  Hz, 1H), 3.34 (d,  $J = 14.0$  Hz, 1H), 2.33 (s, 3H), 1.70 (s, 3H).  $^{13}\text{C}$  NMR ( $\text{CDCl}_3$ , 150 MHz)  $\delta$  168.1, 149.8, 143.1, 140.5, 138.4, 138.3, 133.3, 132.4, 130.1, 125.4, 124.6, 121.9, 118.7, 115.7, 47.1, 37.8, 24.4, 21.4. HRMS (ESI)  $m/z$  calcd for  $\text{C}_{18}\text{H}_{17}\text{N}_2\text{OSSe}$   $[\text{M}+\text{H}]^+$ : 389.0222; Found: 389.0218.

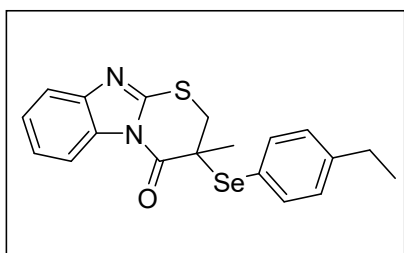

**3-((4-Ethylphenyl)selanyl)-3-methyl-2,3-dihydro-4*H*-benzo[4,5]imidazo[2,1-*b*][1,3]thiazin-4-one (4e):** New compound, 32.2 mg, 80% yield. Pale yellow oil.  $^1\text{H}$  NMR ( $\text{CDCl}_3$ , 600 MHz)  $\delta$  8.20 (d,  $J = 7.9$  Hz, 1H), 7.61 (d,  $J = 7.8$  Hz, 1H), 7.43 (d,  $J = 7.9$  Hz, 2H), 7.36-7.33 (m, 1H), 7.31-7.29 (m, 1H), 7.11 (d,  $J = 7.9$  Hz, 2H), 3.79 (d,  $J = 14.0$  Hz, 1H), 3.34 (d,  $J = 13.9$  Hz, 1H), 2.62 (q,  $J = 7.6$  Hz, 2H), 1.70 (s, 3H), 1.20 (t,  $J = 7.6$  Hz, 3H).  $^{13}\text{C}$  NMR ( $\text{CDCl}_3$ , 150 MHz)  $\delta$  168.1, 149.8, 146.7, 143.2, 138.5, 133.3, 128.9, 125.4, 124.6, 122.2, 118.7, 115.7, 47.1, 37.9, 28.7, 24.4, 15.3. HRMS (ESI)  $m/z$  calcd for  $\text{C}_{19}\text{H}_{19}\text{N}_2\text{OSSe}$   $[\text{M}+\text{H}]^+$ : 403.0378; Found: 403.0378.

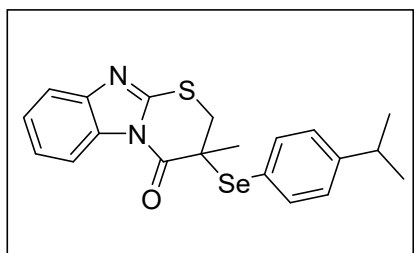

**3-((4-Isopropylphenyl)selanyl)-3-methyl-2,3-dihydro-4*H*-benzo[4,5]imidazo[2,1-*b*][1,3]thiazin-4-one (4f):** New compound, 19.1 mg, 46% yield. Pale yellow oil.  $^1\text{H}$  NMR ( $\text{CDCl}_3$ , 600 MHz)  $\delta$  8.21 (d,  $J = 7.7$  Hz, 1H), 7.61 (d,  $J = 7.6$  Hz, 1H), 7.45 (d,  $J = 8.1$  Hz, 2H), 7.36-7.33 (m, 1H), 7.32-7.29 (m, 1H), 7.13

(d,  $J = 8.0$  Hz, 2H), 3.80 (d,  $J = 14.0$  Hz, 1H), 3.35 (d,  $J = 13.9$  Hz, 1H), 2.87 (sept,  $J = 6.9$  Hz, 1H), 1.72 (s, 3H), 1.21 (dd,  $J = 7.0, 1.3$  Hz, 6H).  $^{13}\text{C}$  NMR ( $\text{CDCl}_3$ , 150 MHz)  $\delta$  168.2, 151.3, 149.8, 143.2, 138.5, 133.3, 127.5, 125.5, 124.6, 122.3, 118.8, 115.7, 47.2, 38.0, 34.1, 24.5, 23.9, 23.9. **HRMS** (ESI)  $m/z$  calcd for  $\text{C}_{20}\text{H}_{21}\text{N}_2\text{OSSe}$   $[\text{M}+\text{H}]^+$ : 417.0535; Found: 417.0529.

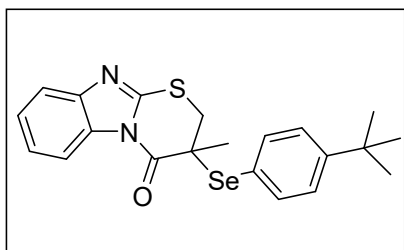

**3-((4-(*tert*-Tutyl)phenyl)selanyl)-3-methyl-2,3-dihydro-4H-**

**benzo[4,5]imidazo[2,1-*b*][1,3]thiazin-4-one (4g)**: New compound, 25.4 mg, 59% yield. Pale yellow oil.  $^1\text{H}$  NMR ( $\text{CDCl}_3$ , 600 MHz)  $\delta$  8.21 (d,  $J = 7.8$  Hz, 1H), 7.60 (d,  $J = 7.9$  Hz, 1H), 7.45 (d,  $J = 8.2$  Hz, 2H), 7.36-7.33 (m, 1H), 7.32-7.27 (m, 3H), 3.80 (d,  $J = 13.9$  Hz, 1H), 3.36 (d,  $J = 13.9$  Hz, 1H), 1.73 (s, 3H), 1.27 (s, 9H).  $^{13}\text{C}$  NMR ( $\text{CDCl}_3$ , 150 MHz)  $\delta$  168.2, 153.6, 149.9, 143.0, 138.2, 133.2, 131.5, 130.3, 126.4, 125.5, 124.6, 122.1, 118.7, 115.7, 47.2, 38.1, 34.9, 31.3, 24.5. **HRMS** (ESI)  $m/z$  calcd for  $\text{C}_{21}\text{H}_{23}\text{N}_2\text{OSSe}$   $[\text{M}+\text{H}]^+$ : 431.0691; Found: 431.0687.

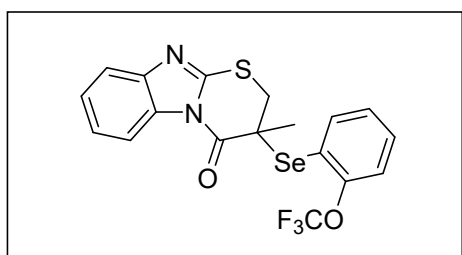

**3-Methyl-3-((2-(trifluoromethoxy)phenyl)selanyl)-2,3-dihydro-4H-**

**benzo[4,5]imidazo[2,1-*b*][1,3]thiazin-4-one (4h)**: New compound, 31.1 mg, 68% yield. Pale yellow oil.  $^1\text{H}$  NMR ( $\text{CDCl}_3$ , 600 MHz)  $\delta$  8.21-8.20 (m, 1H), 7.64-7.63 (m, 1H), 7.58 (dd,  $J = 7.6, 1.6$  Hz, 1H), 7.50-7.47 (m, 1H), 7.38-7.31 (m, 3H), 7.25-7.22 (m, 1H), 3.82 (d,  $J = 14.0$  Hz, 1H), 3.44 (d,  $J = 14.0$  Hz, 1H), 1.70 (s, 3H).  $^{13}\text{C}$  NMR ( $\text{CDCl}_3$ , 150 MHz)  $\delta$  167.8, 151.5, 149.5, 143.2, 141.2, 133.3, 132.5, 127.3, 125.6, 124.7, 120.7, 120.4 (q,  $J = 258.0$  Hz), 119.2, 118.8, 115.7, 48.3, 37.7, 24.0.  $^{19}\text{F}$  NMR

(565 MHz, CDCl<sub>3</sub>)  $\delta$ : 20.9. **HRMS** (ESI)  $m/z$  calcd for C<sub>18</sub>H<sub>14</sub>F<sub>3</sub>N<sub>2</sub>O<sub>2</sub>SSe [M+H]<sup>+</sup>: 458.9888; Found: 458.9881.

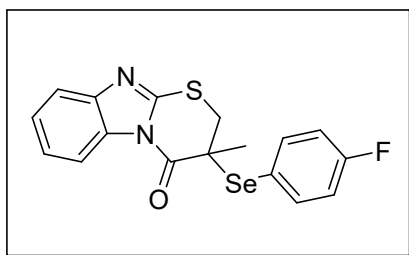

**3-((4-Fluorophenyl)selanyl)-3-methyl-2,3-dihydro-4H-**

**benzo[4,5]imidazo[2,1-b][1,3]thiazin-4-one (4i):** New compound, 31.4 mg, 80% yield. Pale yellow oil. <sup>1</sup>H NMR (CDCl<sub>3</sub>, 600 MHz)  $\delta$  8.20 (d,  $J$  = 7.9 Hz, 1H), 7.63 (d,  $J$  = 7.8 Hz, 1H), 7.50-7.48 (m, 2H), 7.38-7.35 (m, 1H), 7.33-7.31 (m, 1H), 7.00-6.97 (m, 2H), 3.83 (d,  $J$  = 14.0 Hz, 1H), 3.35 (d,  $J$  = 14.0 Hz, 1H), 1.70 (s, 3H). <sup>13</sup>C NMR (CDCl<sub>3</sub>, 150 MHz)  $\delta$  167.9, 164.3 (d,  $J$  = 250.5 Hz), 149.7, 143.1, 140.5 (d,  $J$  = 7.5 Hz), 133.2, 125.6, 124.8, 120.3 (d,  $J$  = 3.0 Hz), 118.8, 116.7, 116.6, 115.7, 47.4, 37.7, 24.4. <sup>19</sup>F NMR (565 MHz, CDCl<sub>3</sub>)  $\delta$ : -32.1. **HRMS** (ESI)  $m/z$  calcd for C<sub>17</sub>H<sub>14</sub>FN<sub>2</sub>OSse [M+H]<sup>+</sup>: 392.9971; Found: 392.9970.

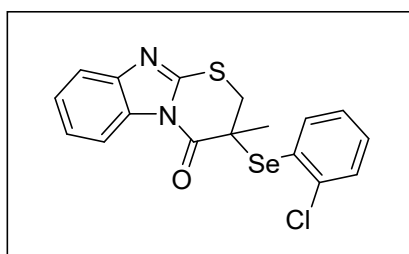

**3-((2-Chlorophenyl)selanyl)-3-methyl-2,3-dihydro-4H-**

**benzo[4,5]imidazo[2,1-b][1,3]thiazin-4-one (4j):** New compound, 21.6 mg, 53% yield. White solid, m.p.: 150.8-151.4 °C. <sup>1</sup>H NMR (CDCl<sub>3</sub>, 600 MHz)  $\delta$  8.22 (d,  $J$  = 7.9 Hz, 1H), 7.63 (d,  $J$  = 7.7 Hz, 1H), 7.57 (dd,  $J$  = 7.6, 1.1 Hz, 1H), 7.50 (d,  $J$  = 8.0 Hz, 1H), 7.37-7.35 (m, 2H), 7.33-7.31 (m, 1H), 7.20-7.17 (m, 1H), 3.84 (d,  $J$  = 14.0 Hz, 1H), 3.47 (d,  $J$  = 14.0 Hz, 1H), 1.74 (s, 3H). <sup>13</sup>C NMR (CDCl<sub>3</sub>, 150 MHz)  $\delta$  167.8, 149.5, 143.2, 141.4, 141.2, 133.3, 132.0, 130.1, 127.4, 126.0, 125.5, 124.7, 118.8, 115.8, 48.5, 37.8, 23.8. **HRMS** (ESI)  $m/z$  calcd for C<sub>17</sub>H<sub>14</sub>ClN<sub>2</sub>OSse [M+H]<sup>+</sup>: 408.9675; Found: 408.9669.

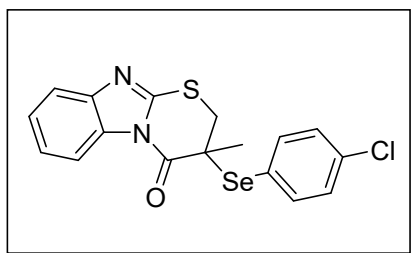

**3-((4-Chlorophenyl)selanyl)-3-methyl-2,3-dihydro-4H-**

**benzo[4,5]imidazo[2,1-*b*][1,3]thiazin-4-one (4k):** New compound, 29.4 mg, 72% yield. White solid, m.p.: 93.2-93.8 °C.  $^1\text{H NMR}$  ( $\text{CDCl}_3$ , 600 MHz)  $\delta$  8.20 (d,  $J = 7.7$  Hz, 1H), 7.63 (d,  $J = 7.7$  Hz, 1H), 7.44-7.43 (m, 2H), 7.38-7.35 (m, 1H), 7.33-7.31 (m, 1H), 7.28-7.25 (m, 2H), 3.83 (d,  $J = 14.0$  Hz, 1H), 3.35 (d,  $J = 14.0$  Hz, 1H), 1.70 (s, 3H).  $^{13}\text{C NMR}$  ( $\text{CDCl}_3$ , 150 MHz)  $\delta$  167.9, 149.5, 143.2, 139.7, 137.0, 133.2, 129.6, 125.6, 124.8, 123.6, 118.8, 115.7, 47.6, 37.8, 24.4. **HRMS** (ESI)  $m/z$  calcd for  $\text{C}_{17}\text{H}_{14}\text{ClN}_2\text{OSSe}$   $[\text{M}+\text{H}]^+$ : 408.9675; Found: 408.9674.

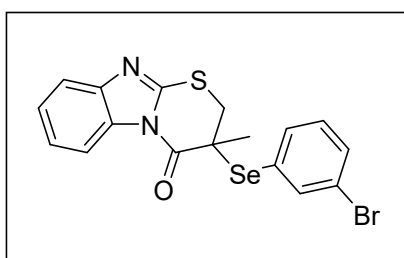

**3-((3-Bromophenyl)selanyl)-3-methyl-2,3-dihydro-4H-**

**benzo[4,5]imidazo[2,1-*b*][1,3]thiazin-4-one (4l):** New compound, 27.1 mg, 60% yield. Pale yellow oil.  $^1\text{H NMR}$  ( $\text{CDCl}_3$ , 600 MHz)  $\delta$  8.21 (d,  $J = 7.9$  Hz, 1H), 7.69 (s, 1H), 7.63 (d,  $J = 7.7$  Hz, 1H), 7.52 (d,  $J = 7.9$  Hz, 1H), 7.44 (d,  $J = 7.6$  Hz, 1H), 7.36 (t,  $J = 7.1$  Hz, 1H), 7.33 (t,  $J = 7.6$  Hz, 1H), 7.17 (t,  $J = 7.9$  Hz, 1H), 3.83 (d,  $J = 14.0$  Hz, 1H), 3.37 (d,  $J = 14.0$  Hz, 1H), 1.74 (s, 3H).  $^{13}\text{C NMR}$  ( $\text{CDCl}_3$ , 150 MHz)  $\delta$  167.8, 149.5, 143.1, 140.7, 136.9, 133.3, 133.2, 130.6, 127.1, 125.7, 124.8, 122.7, 118.8, 115.7, 47.9, 37.8, 24.5. **HRMS** (ESI)  $m/z$  calcd for  $\text{C}_{17}\text{H}_{14}\text{BrN}_2\text{OSSe}$   $[\text{M}+\text{H}]^+$ : 452.9170; Found: 452.9160.

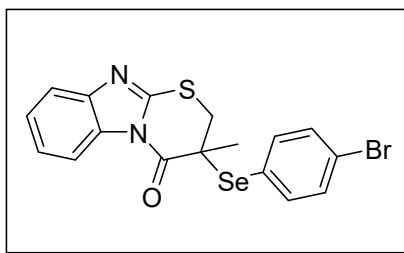

**3-((4-Bromophenyl)selanyl)-3-methyl-2,3-dihydro-4H-**

**benzo[4,5]imidazo[2,1-*b*][1,3]thiazin-4-one (4m):** New compound, 33.9 mg, 75% yield. Pale yellow oil.  $^1\text{H NMR}$  ( $\text{CDCl}_3$ , 600 MHz)  $\delta$  8.20 (d,  $J = 7.9$  Hz, 1H), 7.63 (d,  $J = 7.8$  Hz, 1H), 7.43-7.35 (m, 5H), 7.32 (t,  $J = 7.7$  Hz, 1H), 3.83 (d,  $J = 14.0$  Hz, 1H), 3.35 (d,  $J = 14.0$  Hz, 1H), 1.70 (s, 3H).  $^{13}\text{C NMR}$  ( $\text{CDCl}_3$ , 150 MHz)  $\delta$  167.8, 149.5, 143.1, 139.9, 133.2, 132.5, 125.6, 125.4, 124.8, 124.2, 118.8, 115.6, 47.6, 37.8, 24.4. **HRMS** (ESI)  $m/z$  calcd for  $\text{C}_{17}\text{H}_{14}\text{BrN}_2\text{OSSe}$   $[\text{M}+\text{H}]^+$ : 452.9170; Found: 452.9163.

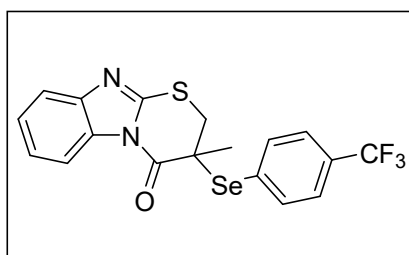

**3-Methyl-3-((4-(trifluoromethyl)phenyl)selanyl)-2,3-dihydro-4H-**

**benzo[4,5]imidazo[2,1-*b*][1,3]thiazin-4-one (4n):** New compound, 37.1 mg, 84% yield. Pale yellow oil.  $^1\text{H NMR}$  ( $\text{CDCl}_3$ , 600 MHz)  $\delta$  8.20-8.17 (m, 1H), 7.63-7.61 (m, 1H), 7.42-7.40 (m, 2H), 7.37-7.34 (m, 3H), 7.33-7.30 (m, 1H), 3.82 (dd,  $J = 14.1, 3.0$  Hz, 1H), 3.34 (dd,  $J = 14.0, 4.6$  Hz, 1H), 1.69 (d,  $J = 4.0$  Hz, 3H).  $^{13}\text{C NMR}$  ( $\text{CDCl}_3$ , 150 MHz)  $\delta$  167.8, 149.4, 143.1, 138.6, 133.1, 132.2 (q,  $J = 31.5$  Hz), 130.0, 125.9 (q,  $J = 3.0$  Hz), 125.7, 124.9, 123.9 (q,  $J = 271.5$  Hz), 118.9, 115.7, 48.0, 37.9, 24.5.  $^{19}\text{F NMR}$  (565 MHz,  $\text{CDCl}_3$ )  $\delta$ : 14.9. **HRMS** (ESI)  $m/z$  calcd for  $\text{C}_{18}\text{H}_{14}\text{F}_3\text{N}_2\text{OSSe}$   $[\text{M}+\text{H}]^+$ : 442.9939; Found: 442.9933.

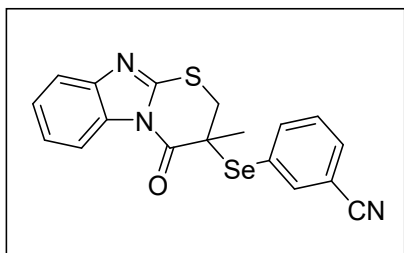

**3-((3-Methyl-4-oxo-3,4-dihydro-2H-benzo[4,5]imidazo[2,1-b][1,3]thiazin-3-yl)selenanyl)benzonitrile (4o):** New compound, 22.7 mg, 57% yield. Pale yellow oil.  $^1\text{H}$  NMR ( $\text{CDCl}_3$ , 600 MHz)  $\delta$  8.19-8.18 (m, 1H), 7.81-7.81 (m, 1H), 7.74-7.73 (m, 1H), 7.67-7.65 (m, 1H), 7.62-7.61 (m, 1H), 7.41-7.38 (m, 1H), 7.37-7.35 (m, 1H), 7.35-7.32 (m, 1H), 3.88 (d,  $J = 14.1$  Hz, 1H), 3.38 (d,  $J = 14.1$  Hz, 1H), 1.71 (s, 3H).  $^{13}\text{C}$  NMR ( $\text{CDCl}_3$ , 150 MHz)  $\delta$  167.6, 149.2, 143.1, 142.6, 141.3, 133.5, 133.1, 129.8, 126.9, 125.8, 125.0, 118.9, 117.8, 115.6, 113.4, 48.3, 37.7, 24.5. HRMS (ESI)  $m/z$  calcd for  $\text{C}_{18}\text{H}_{14}\text{N}_3\text{OSSe}$   $[\text{M}+\text{H}]^+$ : 400.0018; Found: 400.0017.

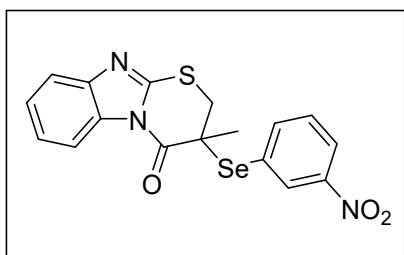

**3-Methyl-3-((3-nitrophenyl)selenanyl)-2,3-dihydro-4H-benzo[4,5]imidazo[2,1-b][1,3]thiazin-4-one (4p):** New compound, 15.1 mg, 36% yield. Pale yellow oil.  $^1\text{H}$  NMR ( $\text{CDCl}_3$ , 600 MHz)  $\delta$  8.40 (t,  $J = 1.9$  Hz, 1H), 8.24-8.23 (m, 1H), 8.20-8.19 (m, 1H), 7.84-7.82 (m, 1H), 7.64-7.62 (m, 1H), 7.48 (t,  $J = 7.9$  Hz, 1H), 7.39-7.36 (m, 1H), 7.35-7.32 (m, 1H), 3.90 (d,  $J = 14.1$  Hz, 1H), 3.41 (d,  $J = 14.1$  Hz, 1H), 1.75 (s, 3H).  $^{13}\text{C}$  NMR ( $\text{CDCl}_3$ , 150 MHz)  $\delta$  167.6, 149.2, 148.1, 144.1, 143.1, 133.1, 132.9, 130.0, 127.1, 125.8, 125.0, 125.0, 119.0, 115.7, 48.6, 37.8, 24.6. HRMS (ESI)  $m/z$  calcd for  $\text{C}_{17}\text{H}_{14}\text{N}_3\text{O}_3\text{SSe}$   $[\text{M}+\text{H}]^+$ : 419.9916; Found: 419.9918.

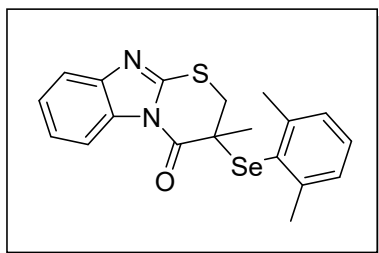

**3-((2,6-Dimethylphenyl)selanyl)-3-methyl-2,3-dihydro-4H-**

**benzo[4,5]imidazo[2,1-b][1,3]thiazin-4-one (4q):** New compound, 28.9 mg, 72% yield. Pale yellow oil.  $^1\text{H NMR}$  ( $\text{CDCl}_3$ , 600 MHz)  $\delta$  8.18 (d,  $J = 8.0$  Hz, 1H), 7.62 (d,  $J = 7.9$  Hz, 1H), 7.35 (t,  $J = 7.4$  Hz, 1H), 7.30 (t,  $J = 7.9$  Hz, 1H), 7.27 (s, 1H), 7.15 (d,  $J = 7.7$  Hz, 1H), 7.07 (d,  $J = 7.6$  Hz, 1H), 3.83 (d,  $J = 13.9$  Hz, 1H), 3.37 (d,  $J = 13.9$  Hz, 1H), 2.33 (s, 3H), 2.20 (s, 3H), 1.72 (s, 3H).  $^{13}\text{C NMR}$  ( $\text{CDCl}_3$ , 150 MHz)  $\delta$  168.0, 149.9, 143.1, 141.0, 140.6, 136.1, 133.2, 131.5, 130.2, 126.2, 125.5, 124.6, 118.7, 115.6, 47.3, 38.0, 24.2, 23.0, 20.6. **HRMS** (ESI)  $m/z$  calcd for  $\text{C}_{19}\text{H}_{19}\text{N}_2\text{OSSe}$   $[\text{M}+\text{H}]^+$ : 403.0378; Found: 403.0378.

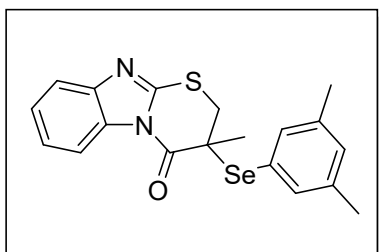

**3-((3,5-Dimethylphenyl)selanyl)-3-methyl-2,3-dihydro-4H-**

**benzo[4,5]imidazo[2,1-b][1,3]thiazin-4-one (4r):** New compound, 25.3 mg, 63%. Pale yellow oil.  $^1\text{H NMR}$  ( $\text{CDCl}_3$ , 600 MHz)  $\delta$  8.18 (d,  $J = 7.9$  Hz, 1H), 7.60 (d,  $J = 7.6$  Hz, 1H), 7.35-7.33 (m, 1H), 7.31-7.28 (m, 1H), 7.12 (s, 2H), 6.96 (s, 1H), 3.77 (d,  $J = 14.0$  Hz, 1H), 3.33 (d,  $J = 14.0$  Hz, 1H), 2.23 (s, 6H), 1.75 (s, 3H).  $^{13}\text{C NMR}$  ( $\text{CDCl}_3$ , 150 MHz)  $\delta$  168.0, 149.9, 143.2, 138.8, 136.0, 133.2, 131.9, 129.1, 125.4, 124.9, 124.5, 118.7, 115.5, 47.3, 37.9, 24.5, 21.1. **HRMS** (ESI)  $m/z$  calcd for  $\text{C}_{19}\text{H}_{19}\text{N}_2\text{OSSe}$   $[\text{M}+\text{H}]^+$ : 403.0378; Found: 403.0378.



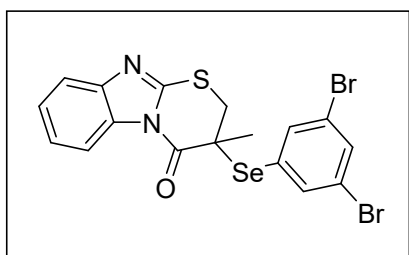

**3-((3,5-Dibromophenyl)selanyl)-3-methyl-2,3-dihydro-4H-**

**benzo[4,5]imidazo[2,1-*b*][1,3]thiazin-4-one (4s):** New compound, 37.1 mg, 70% yield. Pale yellow oil.  $^1\text{H NMR}$  ( $\text{CDCl}_3$ , 600 MHz)  $\delta$  8.21-8.19 (m, 1H), 7.64 (t,  $J = 1.7$  Hz, 1H), 7.62-7.61 (m, 1H), 7.59 (d,  $J = 1.7$  Hz, 2H), 7.37-7.35 (m, 1H), 7.34-7.31 (m, 1H), 3.84 (d,  $J = 14.1$  Hz, 1H), 3.36 (d,  $J = 14.1$  Hz, 1H), 1.75 (s, 3H).  $^{13}\text{C NMR}$  ( $\text{CDCl}_3$ , 150 MHz)  $\delta$  167.5, 149.2, 143.1, 139.2, 135.7, 133.0, 128.2, 125.7, 124.9, 122.9, 118.9, 115.7, 48.7, 37.7, 24.5. **HRMS** (ESI)  $m/z$  calcd for  $\text{C}_{17}\text{H}_{13}\text{Br}_2\text{N}_2\text{OSSe}$   $[\text{M}+\text{H}]^+$ : 532.8255; Found: 532.8255.

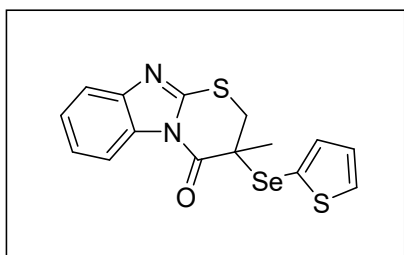

**3-Methyl-3-(thiophen-2-ylselanyl)-2,3-dihydro-4H-benzo[4,5]imidazo[2,1-**

***b*][1,3]thiazin-4-one (4t):** New compound, 32.3 mg, 85% yield. Pale yellow oil.  $^1\text{H NMR}$  ( $\text{CDCl}_3$ , 600 MHz)  $\delta$  8.21 (d,  $J = 7.8$  Hz, 1H), 7.63 (d,  $J = 7.6$  Hz, 1H), 7.52-7.51 (m, 1H), 7.37-7.34 (m, 1H), 7.33-7.30 (m, 1H), 7.22-7.21 (m, 1H), 7.06-7.04 (m, 1H), 3.72 (d,  $J = 14.1$  Hz, 1H), 3.38 (d,  $J = 14.0$  Hz, 1H), 1.77 (s, 3H).  $^{13}\text{C NMR}$  ( $\text{CDCl}_3$ , 150 MHz)  $\delta$  167.9, 149.5, 143.1, 140.1, 134.4, 133.2, 128.7, 125.6, 124.8, 119.3, 118.8, 115.7, 49.0, 37.3, 24.1. **HRMS** (ESI)  $m/z$  calcd for  $\text{C}_{15}\text{H}_{13}\text{N}_2\text{OS}_2\text{Se}$   $[\text{M}+\text{H}]^+$ : 380.9629; Found: 380.9628.

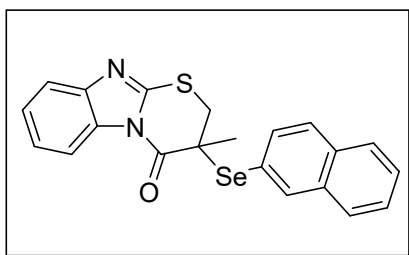

**3-Methyl-3-(naphthalen-2-ylselanyl)-2,3-dihydro-4H-benzo[4,5]imidazo[2,1-b][1,3]thiazin-4-one (4u):** New compound, 33.9 mg, 80% yield. Pale yellow oil.  $^1\text{H}$  NMR ( $\text{CDCl}_3$ , 600 MHz)  $\delta$  8.21 (d,  $J = 7.9$  Hz, 1H), 8.05 (s, 1H), 7.82 (d,  $J = 7.5$  Hz, 1H), 7.75 (t,  $J = 8.0$  Hz, 2H), 7.61 (d,  $J = 7.7$  Hz, 1H), 7.56-7.49 (m, 3H), 7.36-7.34 (m, 1H), 7.32-7.30 (m, 1H), 3.79 (d,  $J = 13.9$  Hz, 1H), 3.38 (d,  $J = 13.9$  Hz, 1H), 1.73 (s, 3H).  $^{13}\text{C}$  NMR ( $\text{CDCl}_3$ , 150 MHz)  $\delta$  168.1, 149.7, 143.2, 138.9, 134.3, 133.6, 133.6, 133.3, 128.7, 128.1, 127.9, 127.5, 126.7, 125.5, 124.6, 122.8, 118.7, 115.6, 47.6, 37.8, 24.5. HRMS (ESI)  $m/z$  calcd for  $\text{C}_{21}\text{H}_{17}\text{N}_2\text{OSSe}$   $[\text{M}+\text{H}]^+$ : 425.0222; Found: 425.0216.

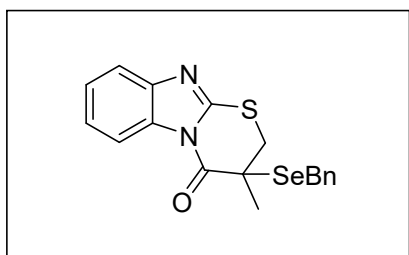

**3-(Benzylselanyl)-3-methyl-2,3-dihydro-4H-benzo[4,5]imidazo[2,1-b][1,3]thiazin-4-one (4v):** New compound, 32.2 mg, 83% yield. Pale yellow oil.  $^1\text{H}$  NMR ( $\text{CDCl}_3$ , 600 MHz)  $\delta$  8.27 (d,  $J = 7.4$  Hz, 1H), 7.63 (d,  $J = 8.1$  Hz, 1H), 7.38-7.32 (m, 2H), 7.25-7.21 (m, 4H), 7.19-7.18 (m, 1H), 4.07 (d,  $J = 10.6$  Hz, 1H), 3.99 (d,  $J = 10.8$  Hz, 1H), 3.79 (d,  $J = 14.0$  Hz, 1H), 3.25 (d,  $J = 14.0$  Hz, 1H), 2.01 (s, 3H).  $^{13}\text{C}$  NMR ( $\text{CDCl}_3$ , 150 MHz)  $\delta$  168.0, 149.7, 143.2, 136.4, 133.4, 129.4, 129.2, 128.8, 127.4, 125.5, 124.9, 124.7, 118.9, 115.8, 45.0, 37.7, 27.8, 24.5. HRMS (ESI)  $m/z$  calcd for  $\text{C}_{18}\text{H}_{17}\text{N}_2\text{OSSe}$   $[\text{M}+\text{H}]^+$ : 389.0222; Found: 389.0218.

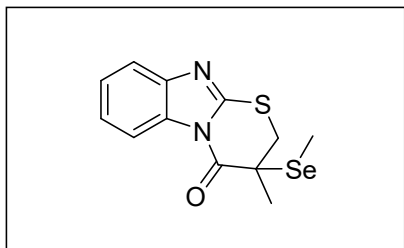

**3-Methyl-3-(methylselanyl)-2,3-dihydro-4H-benzo[4,5]imidazo[2,1-b][1,3]thiazin-4-one (4w):** New compound, 25.0 mg, 80% yield. Pale yellow oil.  $^1\text{H}$  NMR ( $\text{CDCl}_3$ , 600 MHz)  $\delta$  8.21-8.20 (m, 1H), 7.60-7.59 (m, 1H), 7.34-7.31 (m, 1H), 7.30-7.27 (m, 1H), 3.78 (d,  $J = 14.0$  Hz, 1H), 3.21 (d,  $J = 14.0$  Hz, 1H), 2.10 (s, 3H), 1.88 (s, 3H).  $^{13}\text{C}$  NMR ( $\text{CDCl}_3$ , 150 MHz)  $\delta$  167.5, 149.7, 143.1, 133.3, 125.4, 124.5, 118.7, 115.7, 42.5, 37.6, 23.5, 3.6. HRMS (ESI)  $m/z$  calcd for  $\text{C}_{12}\text{H}_{13}\text{N}_2\text{OSSe}$   $[\text{M}+\text{H}]^+$ : 312.9909; Found: 312.9903.

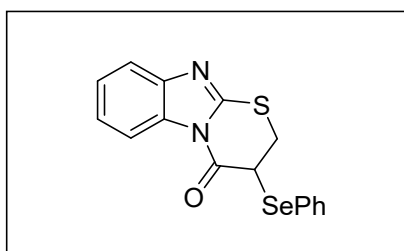

**3-(Phenylselanyl)-2,3-dihydro-4H-benzo[4,5]imidazo[2,1-b][1,3]thiazin-4-one (5a):** New compound, 7.2 mg, 20% yield. Pale yellow oil.  $^1\text{H}$  NMR ( $\text{CDCl}_3$ , 600 MHz)  $\delta$  8.21-8.19 (m, 1H), 7.69-7.68 (m, 2H), 7.63-7.61 (m, 1H), 7.38-7.31 (m, 5H), 4.47 (dd,  $J = 5.9, 3.1$  Hz, 1H), 3.83 (dd,  $J = 13.7, 3.1$  Hz, 1H), 3.48 (dd,  $J = 13.7, 5.9$  Hz, 1H).  $^{13}\text{C}$  NMR ( $\text{CDCl}_3$ , 150 MHz)  $\delta$  166.3, 143.0, 136.1, 132.9, 129.7, 129.5, 126.7, 125.8, 124.9, 118.9, 115.8, 43.5, 31.8. HRMS (ESI)  $m/z$  calcd for  $\text{C}_{16}\text{H}_{13}\text{N}_2\text{OSSe}$   $[\text{M}+\text{H}]^+$ : 360.9909; Found: 360.9906.

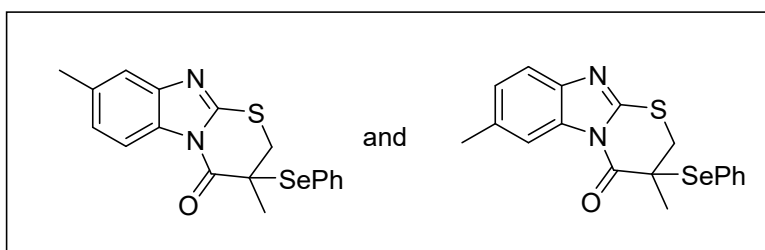

**3,7-Dimethyl-3-(phenylselanyl)-2,3-dihydro-4H-benzo[4,5]imidazo[2,1-**

**b**[1,3]thiazin-4-one and 3,8-dimethyl-3-(phenylselanyl)-2,3-dihydro-4*H*-benzo[4,5]imidazo[2,1-*b*][1,3]thiazin-4-one (**5b**): New compound, 26.7 mg, 69% yield. Pale yellow oil.  $^1\text{H NMR}$  ( $\text{CDCl}_3$ , 600 MHz)  $\delta$  8.06 (d,  $J = 8.2$  Hz, 1H), 8.05 (s, 1H), 7.74 (d,  $J = 1.7$  Hz, 1H), 7.55-7.52 (m, 4H), 7.49 (d,  $J = 8.1$  Hz, 1H), 7.43-7.39 (m, 3H), 7.33-7.29 (m, 4H), 7.18-7.16 (m, 1H), 7.13-7.12 (m, 1H), 3.79-3.77 (m, 2H), 3.36-3.33 (m, 2H), 2.49 (s, 3H), 2.47 (s, 3H), 1.70 (s, 3H), 1.69 (s, 3H).  $^{13}\text{C NMR}$  ( $\text{CDCl}_3$ , 150 MHz)  $\delta$  168.3, 168.0, 149.6, 148.8, 143.5, 141.2, 138.5, 135.5, 134.9, 133.4, 131.2, 130.1, 129.2, 126.6, 125.7, 125.6, 125.5, 118.8, 118.2, 116.0, 115.1, 47.3, 47.2, 37.9, 37.9, 24.4, 24.4, 21.9, 21.7. **HRMS** (ESI)  $m/z$  calcd for  $\text{C}_{18}\text{H}_{17}\text{N}_2\text{OSSe}$   $[\text{M}+\text{H}]^+$ : 389.0222; Found: 389.0218.

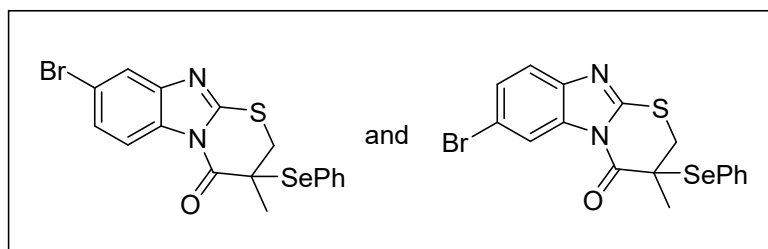

**7-Bromo-3-methyl-3-(phenylselanyl)-2,3-dihydro-4*H*-benzo[4,5]imidazo[2,1-*b*][1,3]thiazin-4-one and 8-bromo-3-methyl-3-(phenylselanyl)-2,3-dihydro-4*H*-benzo[4,5]imidazo[2,1-*b*][1,3]thiazin-4-one (**5c**):** New compound, 34.8 mg, 80% yield. Pale yellow oil.  $^1\text{H NMR}$  ( $\text{CDCl}_3$ , 600 MHz)  $\delta$  8.39-8.39 (m, 1H), 8.05 (d,  $J = 8.6$  Hz, 1H), 7.74 (d,  $J = 1.7$  Hz, 1H), 7.52-7.49 (m, 4H), 7.46-7.46 (m, 2H), 7.43-7.39 (m, 3H), 7.33-7.28 (m, 4H), 3.83-3.81 (m, 2H), 3.36-3.34 (m, 2H), 1.70 (s, 3H), 1.69 (s, 3H).  $^{13}\text{C NMR}$  ( $\text{CDCl}_3$ , 150 MHz)  $\delta$  167.9, 167.8, 151.3, 150.0, 144.4, 142.2, 138.4, 134.1, 132.2, 130.3, 129.3, 129.3, 128.7, 127.5, 125.3, 125.3, 121.7, 119.8, 118.7, 118.6, 118.0, 116.7, 47.1, 47.0, 37.8, 37.8, 24.3, 24.3. **HRMS** (ESI)  $m/z$  calcd for  $\text{C}_{17}\text{H}_{14}\text{BrN}_2\text{OSSe}$   $[\text{M}+\text{H}]^+$ : 452.9170; Found: 452.9163.

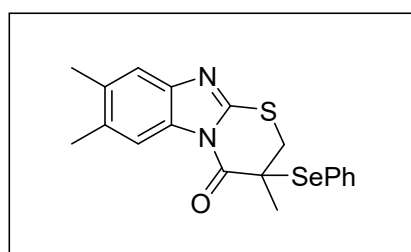

**3,7,8-Trimethyl-3-(phenylselanyl)-2,3-dihydro-4H-benzo[4,5]imidazo[2,1-*b*][1,3]thiazin-4-one (5d):** New compound, 27.3 mg, 68% yield. Pale yellow oil.  $^1\text{H NMR}$  ( $\text{CDCl}_3$ , 600 MHz)  $\delta$  8.00 (s, 1H), 7.55-7.53 (m, 2H), 7.43-7.40 (m, 1H), 7.37 (s, 1H), 7.33-7.30 (m, 2H), 3.77 (d,  $J = 13.9$  Hz, 1H), 3.34 (d,  $J = 13.9$  Hz, 1H), 2.38 (s, 3H), 2.36 (s, 3H), 1.68 (s, 3H).  $^{13}\text{C NMR}$  ( $\text{CDCl}_3$ , 150 MHz)  $\delta$  168.2, 148.5, 141.6, 138.5, 134.3, 133.7, 131.6, 130.1, 129.2, 125.6, 119.1, 116.1, 47.2, 38.0, 24.4, 20.5, 20.4. **HRMS** (ESI)  $m/z$  calcd for  $\text{C}_{19}\text{H}_{19}\text{N}_2\text{OSSe}$   $[\text{M}+\text{H}]^+$ : 403.0378; Found: 403.0375.

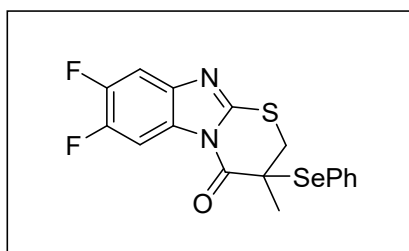

**7,8-Difluoro-3-methyl-3-(phenylselanyl)-2,3-dihydro-4H-benzo[4,5]imidazo[2,1-*b*][1,3]thiazin-4-one (5e):** New compound, 27.5 mg, 67% yield. Pale yellow oil.  $^1\text{H NMR}$  ( $\text{CDCl}_3$ , 600 MHz)  $\delta$  8.08-8.05 (m, 1H), 7.52-7.50 (m, 2H), 7.43-7.38 (m, 2H), 7.33-7.30 (m, 2H), 3.84 (d,  $J = 14.0$  Hz, 1H), 3.37 (d,  $J = 14.0$  Hz, 1H), 1.70 (s, 3H).  $^{13}\text{C NMR}$  ( $\text{CDCl}_3$ , 150 MHz)  $\delta$  167.8, 151.0 (d,  $J = 3.0$  Hz), 150.1 (d,  $J = 15.0$  Hz), 149.3 (d,  $J = 13.5$  Hz), 148.4 (d,  $J = 13.5$  Hz), 147.7 (d,  $J = 15.0$  Hz), 138.9, 138.8 (d,  $J = 1.5$  Hz), 138.5, 130.4, 129.4, 128.5 (d,  $J = 12.0$  Hz), 125.2, 106.7 (d,  $J = 19.5$  Hz), 104.7 (d,  $J = 25.5$  Hz), 47.0, 37.9, 24.3.  $^{19}\text{F NMR}$  (565 MHz,  $\text{CDCl}_3$ )  $\delta$ : -61.4 (d,  $J = 22.6$  Hz), -62.0 (d,  $J = 22.6$  Hz). **HRMS** (ESI)  $m/z$  calcd for  $\text{C}_{17}\text{H}_{13}\text{F}_2\text{N}_2\text{OSSe}$   $[\text{M}+\text{H}]^+$ : 410.9877; Found: 410.9874.

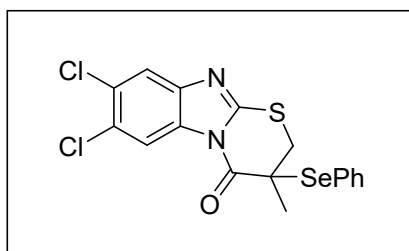

**7,8-Dichloro-3-methyl-3-(phenylselanyl)-2,3-dihydro-4H-benzo[4,5]imidazo[2,1-*b*][1,3]thiazin-4-one (5f):** New compound, 38.4 mg, 87% yield. White solid, m.p.: 147.2-147.9 °C.  $^1\text{H NMR}$  ( $\text{CDCl}_3$ , 600 MHz)  $\delta$  8.31 (s, 1H),

7.66 (s, 1H), 7.51-7.49 (m, 2H), 7.43-7.40 (m, 1H), 7.32-7.30 (m, 2H), 3.85 (d,  $J = 14.0$  Hz, 1H), 3.36 (d,  $J = 14.0$  Hz, 1H), 1.69 (s, 3H).  $^{13}\text{C}$  NMR ( $\text{CDCl}_3$ , 150 MHz)  $\delta$  167.6, 152.0, 142.5, 138.4, 132.2, 130.4, 129.6, 129.4, 128.5, 125.2, 119.8, 117.0, 46.8, 37.8, 24.3. **HRMS** (ESI)  $m/z$  calcd for  $\text{C}_{17}\text{H}_{13}\text{Cl}_2\text{N}_2\text{OSSe}$   $[\text{M}+\text{H}]^+$ : 442.9286; Found: 442.9279.

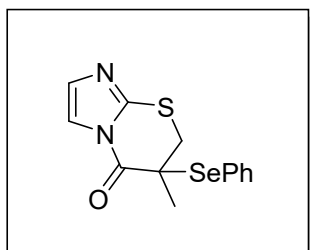

**6-Methyl-6-(phenylselanyl)-6,7-dihydro-5H-imidazo[2,1-*b*][1,3]thiazin-5-one (5g)**: New compound, 15.6 mg, 48% yield. Pale yellow oil.  $^1\text{H}$  NMR ( $\text{CDCl}_3$ , 600 MHz)  $\delta$  7.64 (d,  $J = 1.7$  Hz, 1H), 7.53 (d,  $J = 7.0$  Hz, 2H), 7.44 (t,  $J = 7.4$  Hz, 1H), 7.34 (t,  $J = 7.6$  Hz, 2H), 7.02 (d,  $J = 1.7$  Hz, 1H), 3.72 (d,  $J = 14.0$  Hz, 1H), 3.28 (d,  $J = 14.0$  Hz, 1H), 1.63 (s, 3H).  $^{13}\text{C}$  NMR ( $\text{CDCl}_3$ , 150 MHz)  $\delta$  166.7, 143.0, 138.5, 130.8, 130.3, 129.3, 125.3, 117.1, 46.7, 38.3, 24.2. **HRMS** (ESI)  $m/z$  calcd for  $\text{C}_{13}\text{H}_{13}\text{N}_2\text{OSSe}$   $[\text{M}+\text{H}]^+$ : 324.9909; Found: 324.9906.

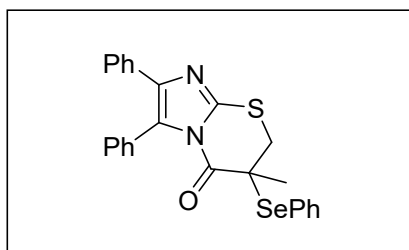

**6-Methyl-2,3-diphenyl-6-(phenylselanyl)-6,7-dihydro-5H-imidazo[2,1-*b*][1,3]thiazin-5-one (5h)**: New compound, 19.0 mg, 40% yield. White solid. m.p.: 189.4-189.9 °C.  $^1\text{H}$  NMR ( $\text{CDCl}_3$ , 600 MHz)  $\delta$  7.53-7.52 (m, 2H), 7.43-7.38 (m, 6H), 7.35-7.34 (m, 2H), 7.28 (t,  $J = 7.7$  Hz, 2H), 7.21-7.18 (m, 3H), 3.72 (d,  $J = 13.9$  Hz, 1H), 3.36 (d,  $J = 13.9$  Hz, 1H), 1.58 (s, 3H).  $^{13}\text{C}$  NMR ( $\text{CDCl}_3$ , 150 MHz)  $\delta$  167.4, 143.4, 140.0, 138.5, 132.7, 132.5, 131.8, 130.6, 130.1, 129.9, 129.3, 129.3, 128.7, 128.6, 128.5, 128.3, 127.6, 127.5, 125.5, 48.0, 37.8, 24.5. **HRMS** (ESI)  $m/z$  calcd for  $\text{C}_{25}\text{H}_{21}\text{N}_2\text{OSSe}$   $[\text{M}+\text{H}]^+$ : 477.0535; Found: 477.0533.

## 5. References

- [1] Zhou, J.; Li, W.; Zheng, H.; Pei, Y.; Liu, X. and Cao, H. Visible Light-induced Cascade Cyclization of 3-Aminoindazoles, Ynals, and Chalcogens: Access to Chalcogen-Containing Pyrimido[1,2-*b*]-indazoles. *Org. Lett.*, 2021, **23**, 2754–2759.

## 6. Copies of NMR spectra

### $^1\text{H}$ NMR of product 4a in $\text{CDCl}_3$ (600 MHz)

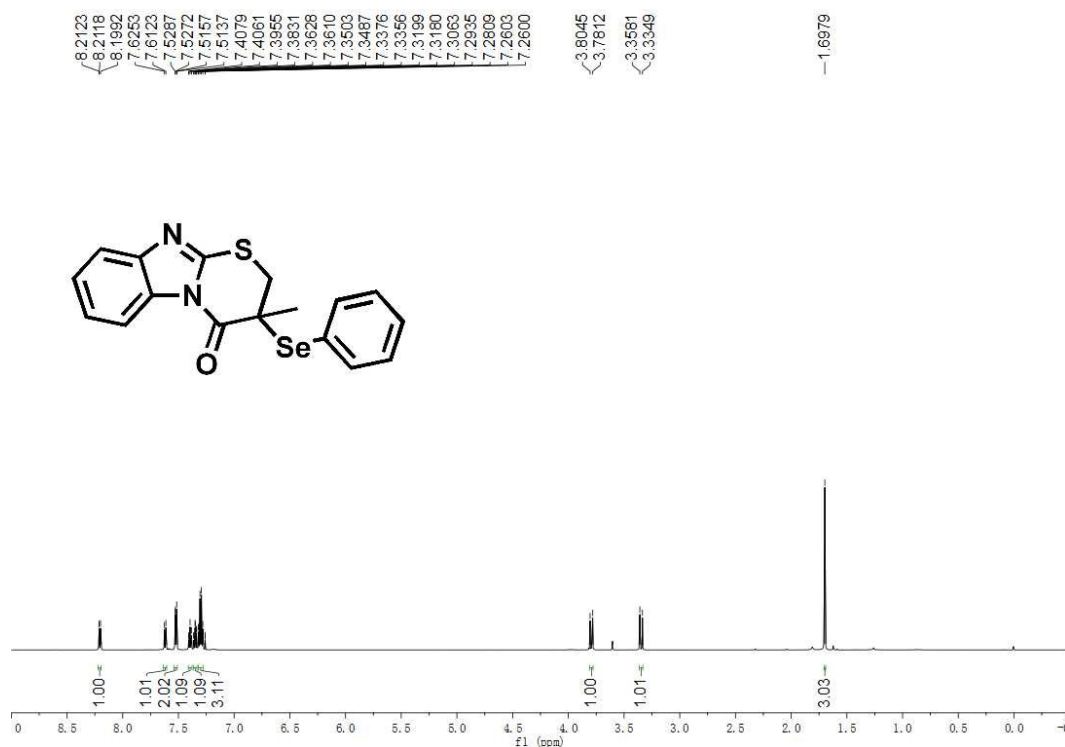

### $^{13}\text{C}$ NMR of product 4a in $\text{CDCl}_3$ (150 MHz)

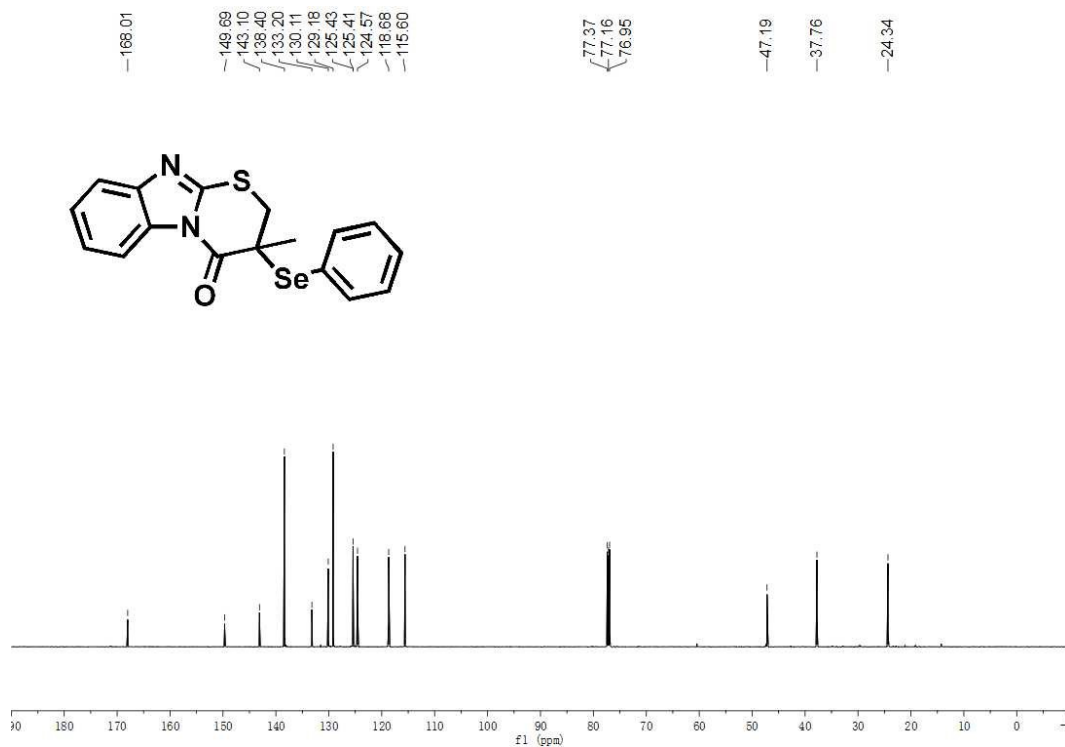



### $^1\text{H}$ NMR of product 4b in $\text{CDCl}_3$ (600 MHz)

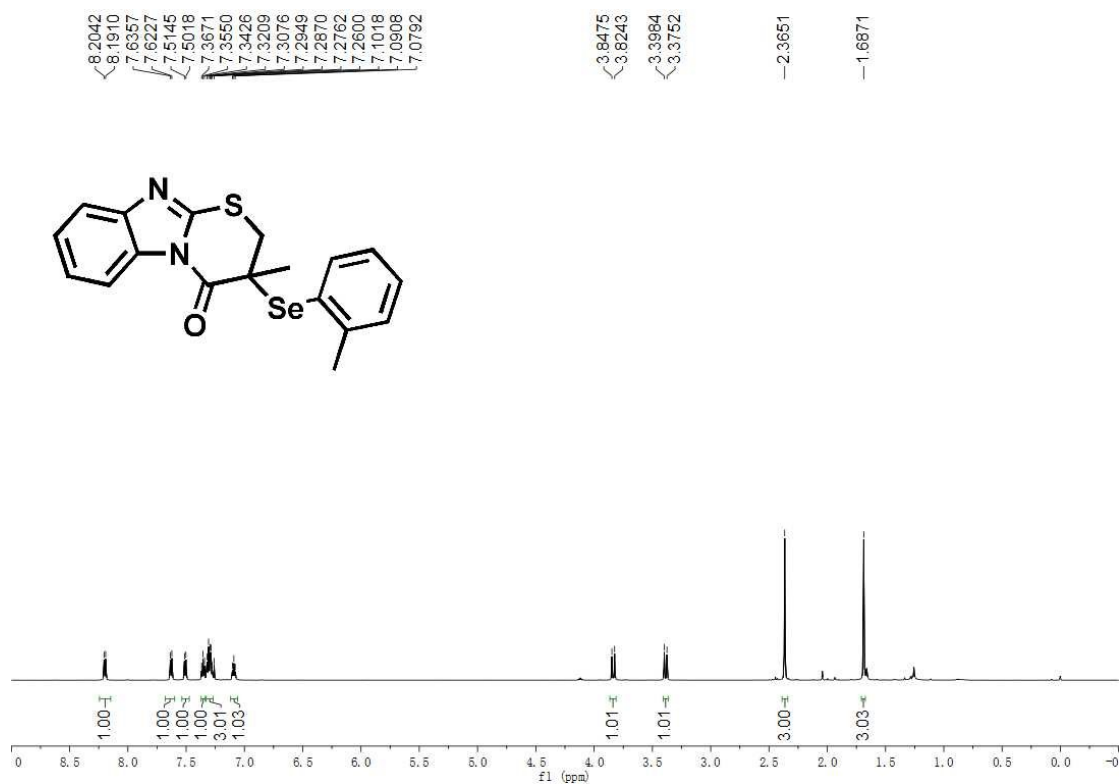

### $^{13}\text{C}$ NMR of product 4b in $\text{CDCl}_3$ (150 MHz)

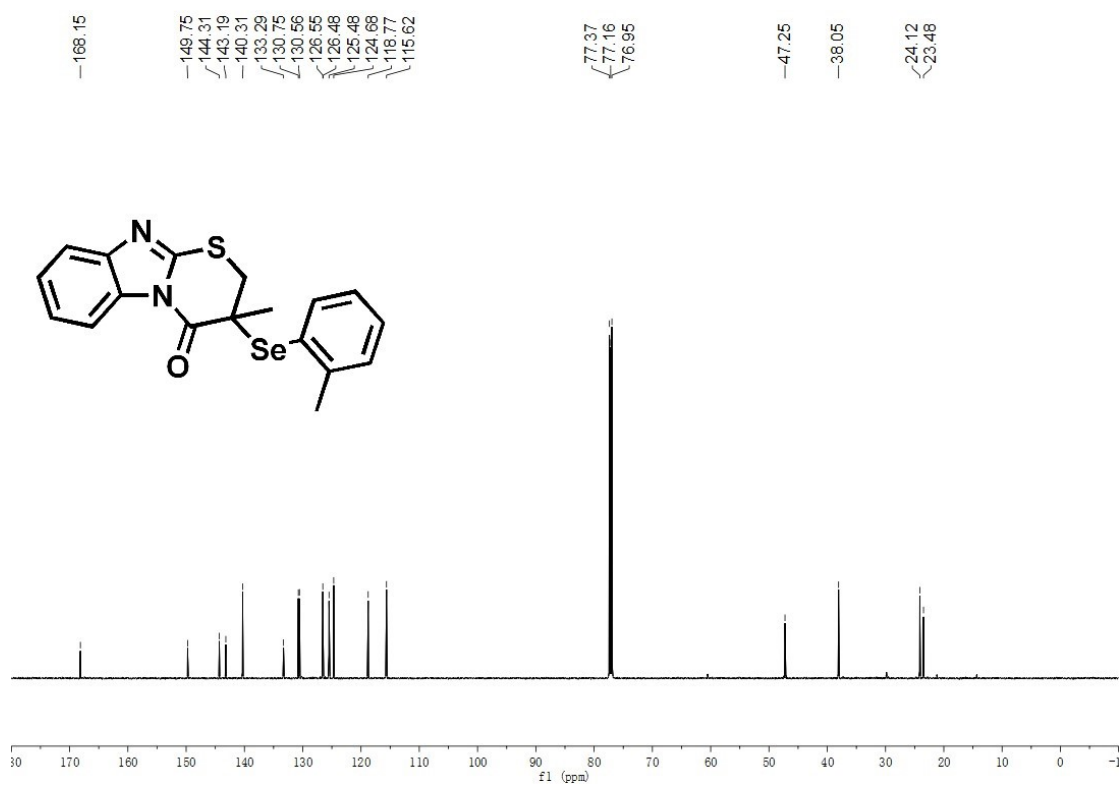

### $^1\text{H}$ NMR of product 4c in $\text{CDCl}_3$ (600 MHz)

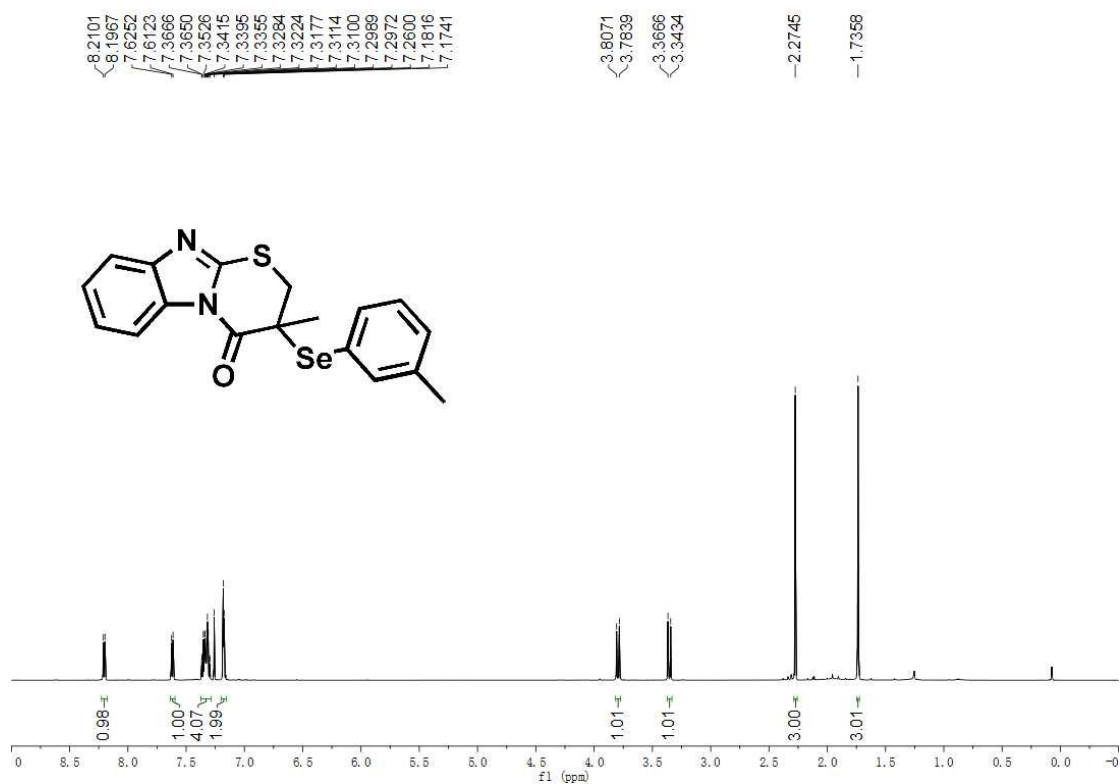

### $^{13}\text{C}$ NMR of product 4c in $\text{CDCl}_3$ (150 MHz)

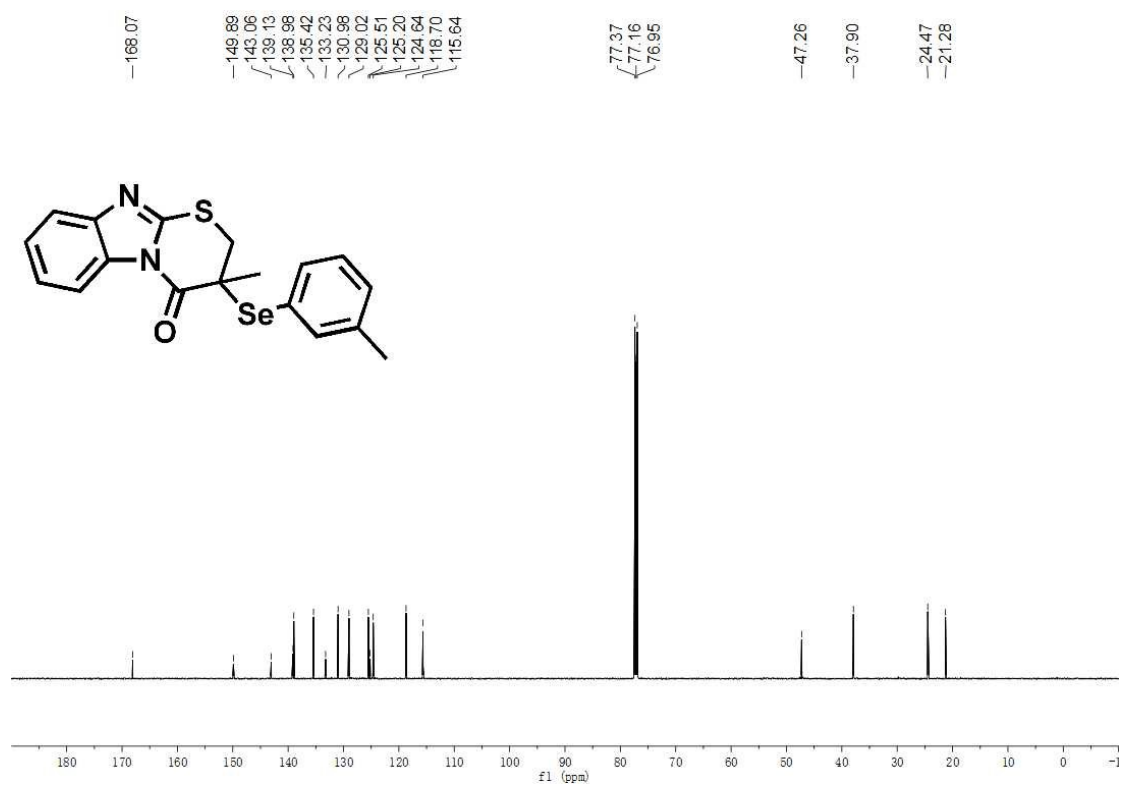

**$^1\text{H}$  NMR of product 4d in  $\text{CDCl}_3$  (600 MHz)**

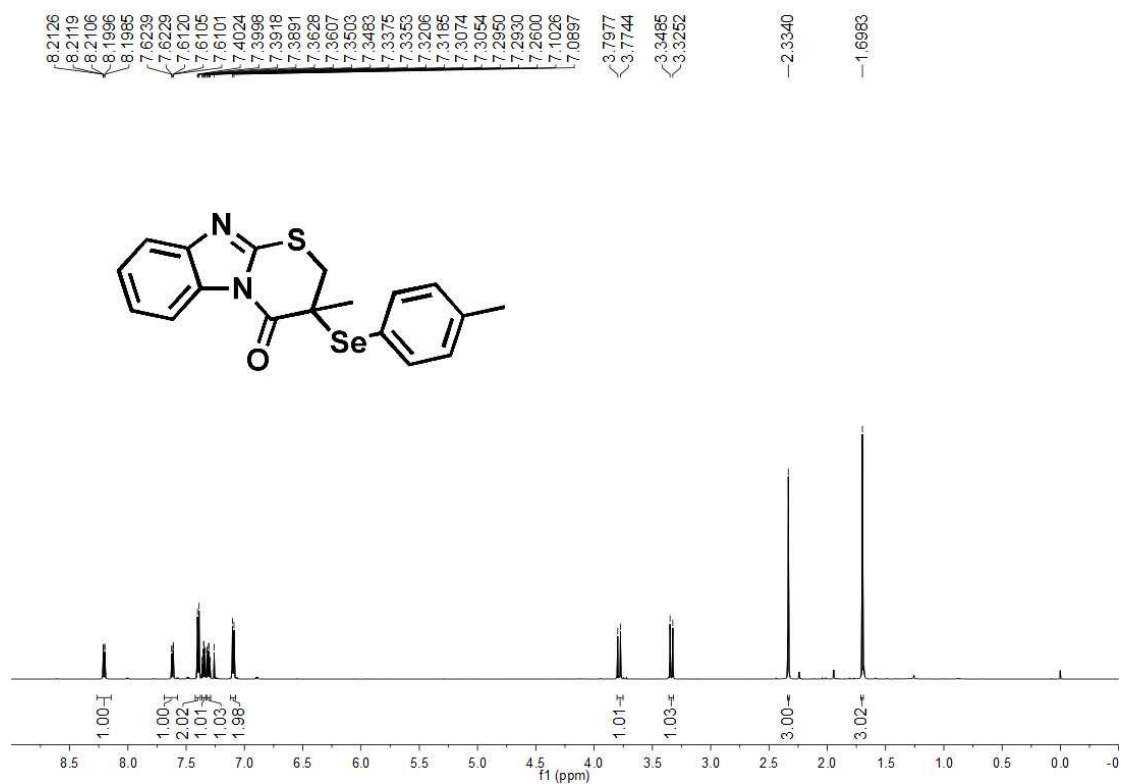

**$^{13}\text{C}$  NMR of product 4d in  $\text{CDCl}_3$  (150 MHz)**

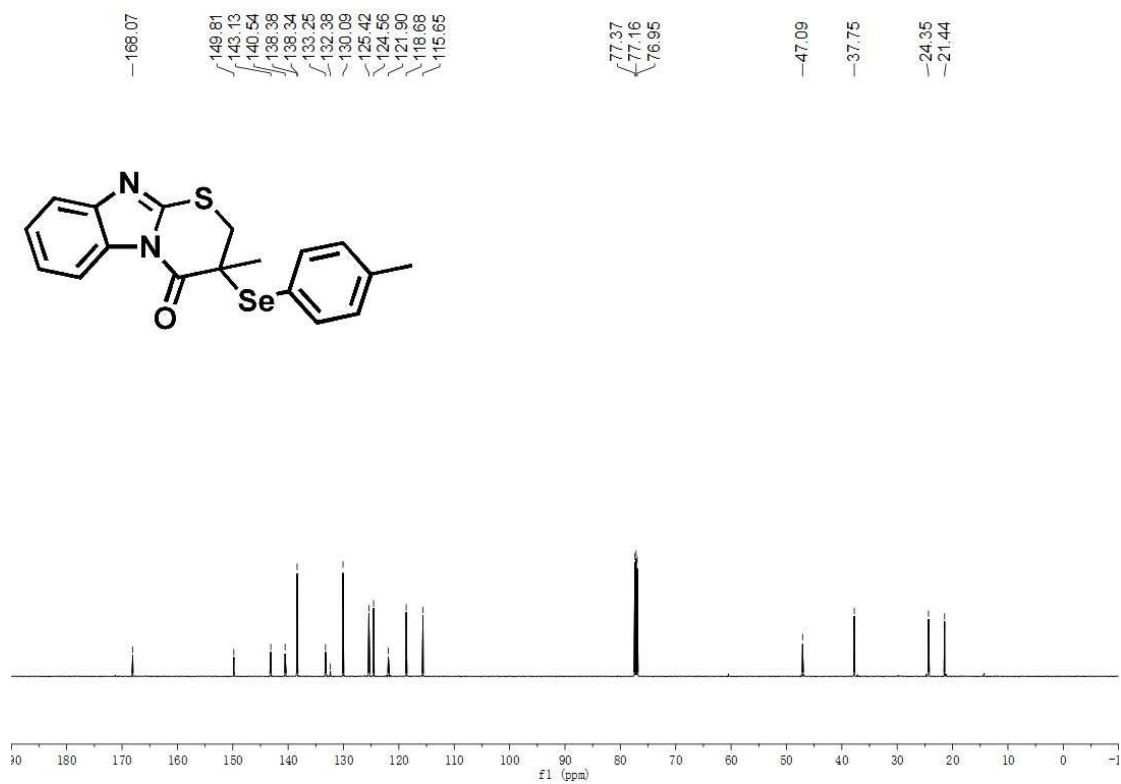

### $^1\text{H}$ NMR of product 4e in $\text{CDCl}_3$ (600 MHz)

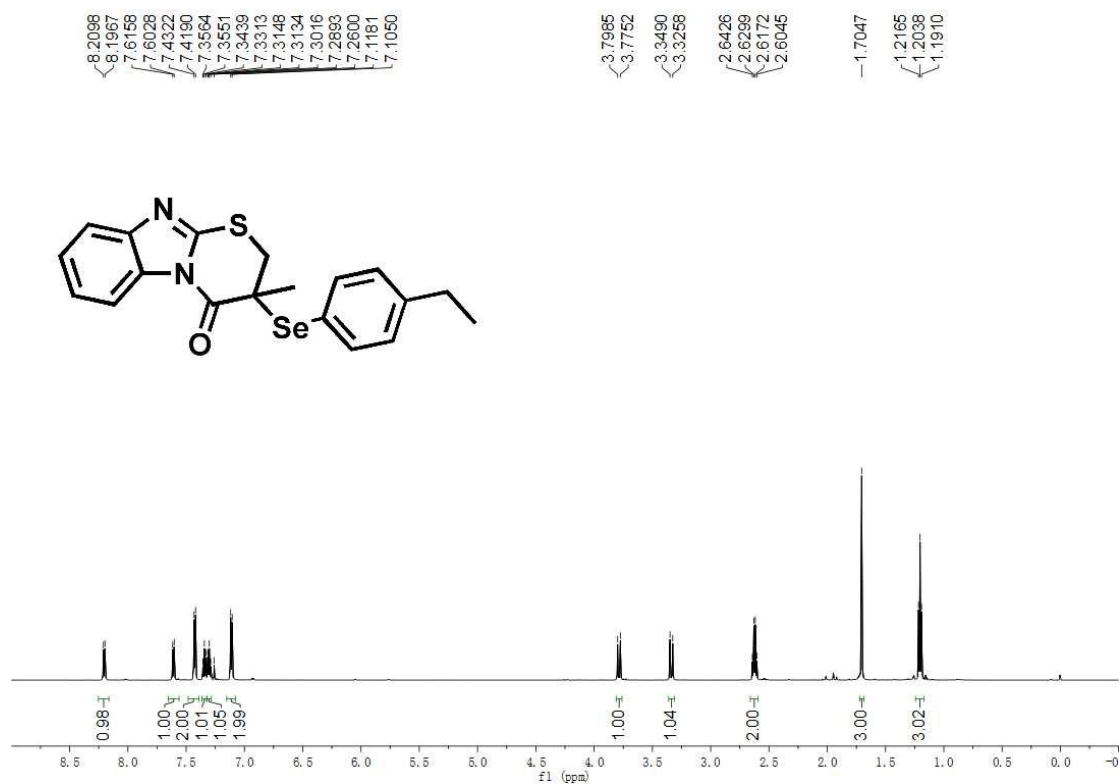

### $^{13}\text{C}$ NMR of product 4e in $\text{CDCl}_3$ (150 MHz)

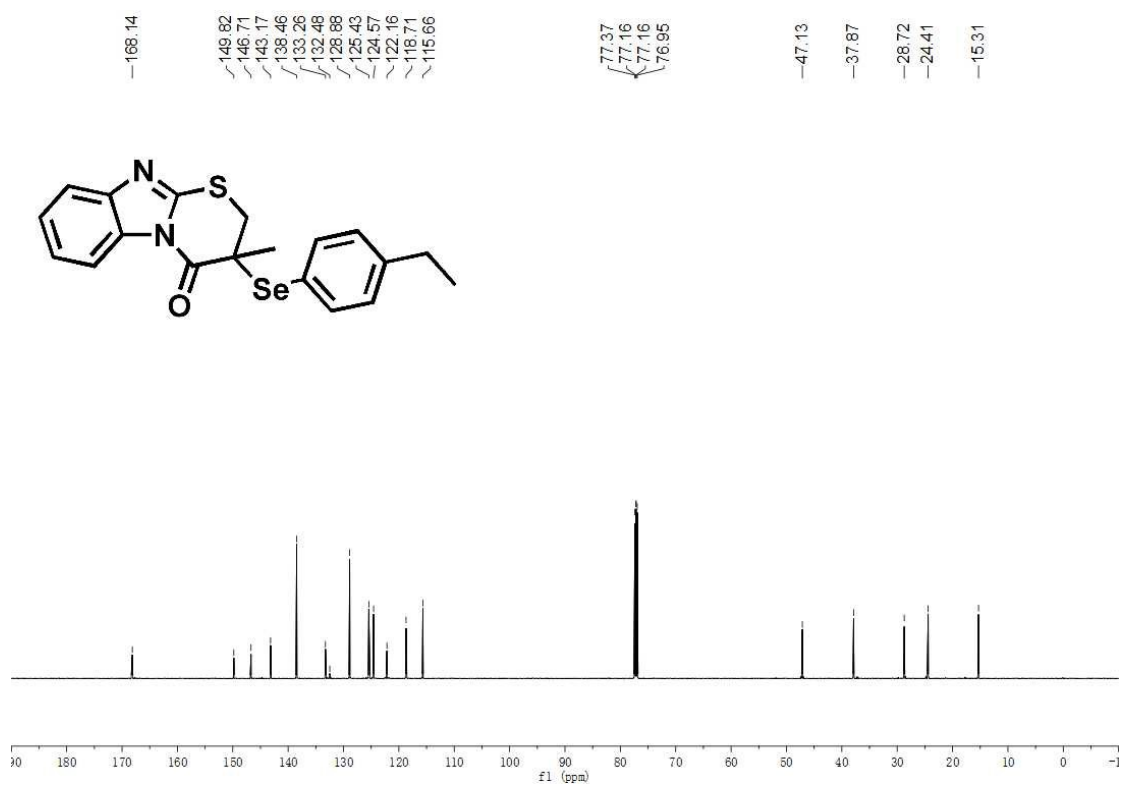

**<sup>1</sup>H NMR of product 4f in CDCl<sub>3</sub> (600 MHz)**

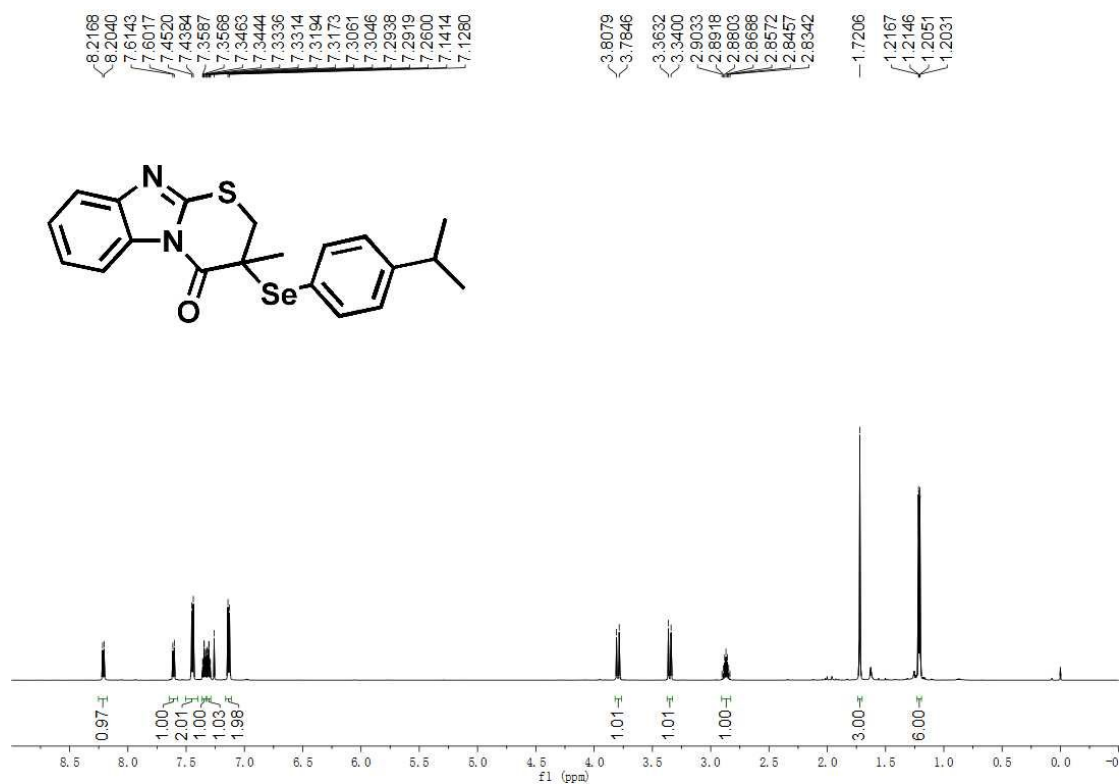

**<sup>13</sup>C NMR of product 4f in CDCl<sub>3</sub> (150 MHz)**

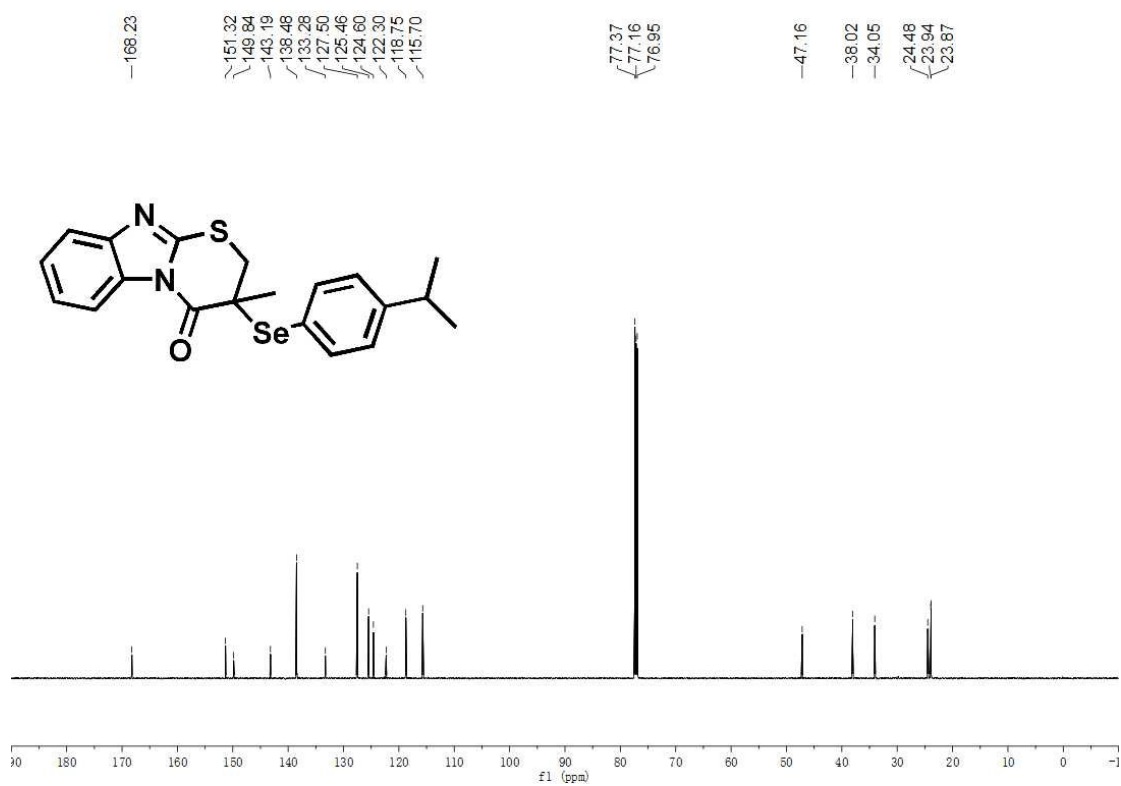

### $^1\text{H}$ NMR of product 4g in $\text{CDCl}_3$ (600 MHz)

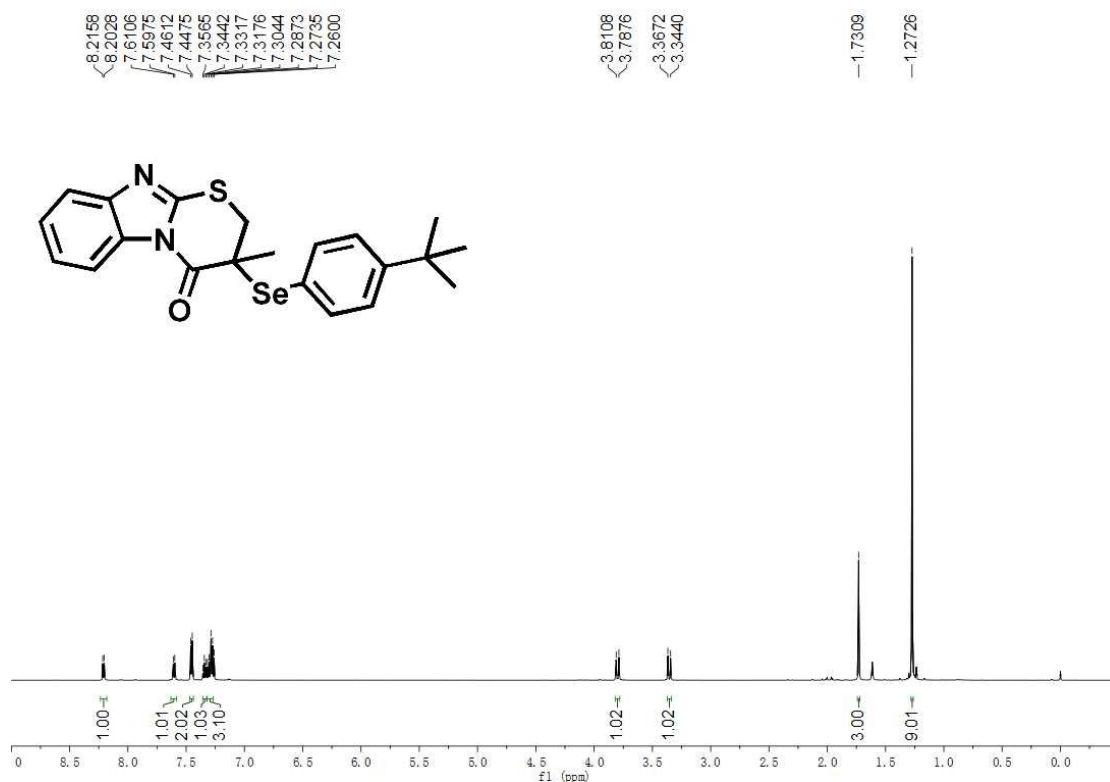

### $^{13}\text{C}$ NMR of product 4g in $\text{CDCl}_3$ (150 MHz)

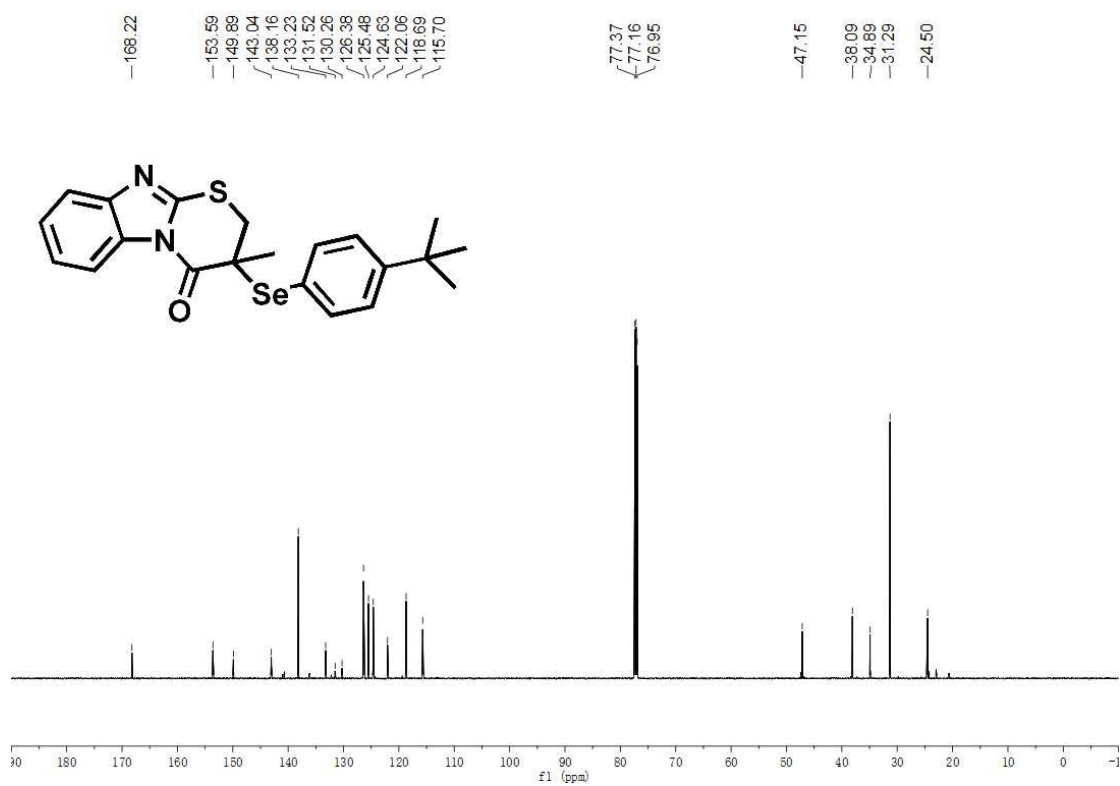

### $^1\text{H}$ NMR of product 4h in $\text{CDCl}_3$ (600 MHz)

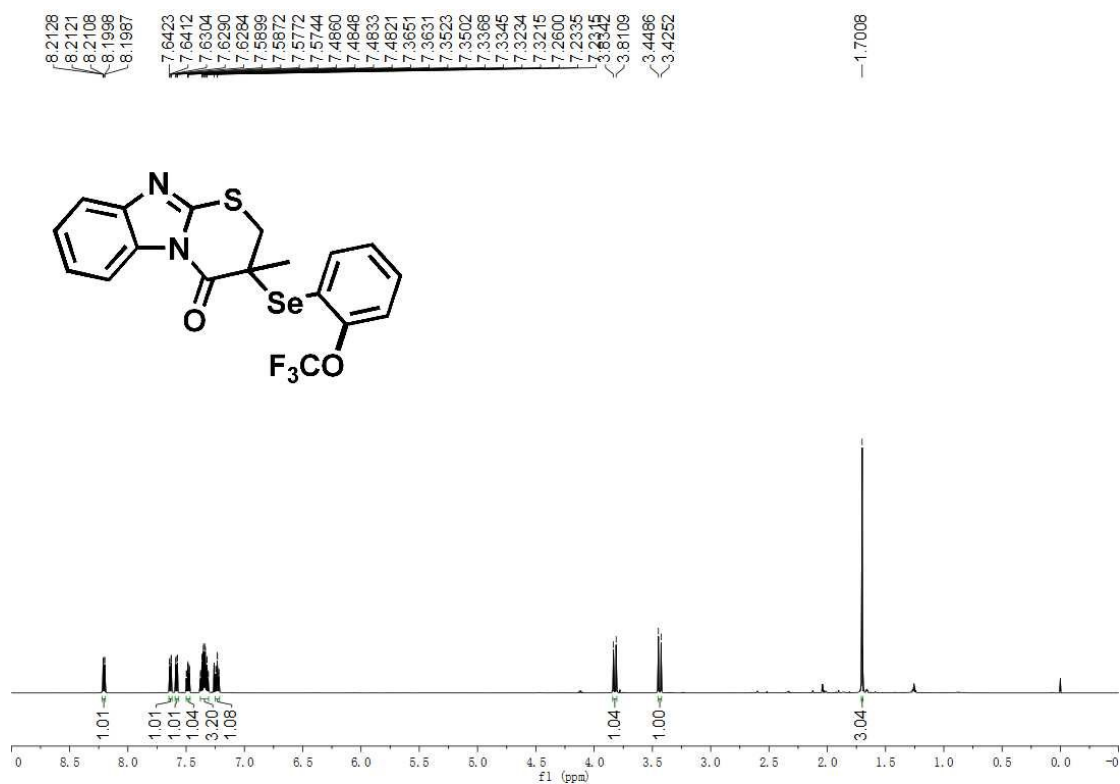

### $^{13}\text{C}$ NMR of product 4h in $\text{CDCl}_3$ (150 MHz)

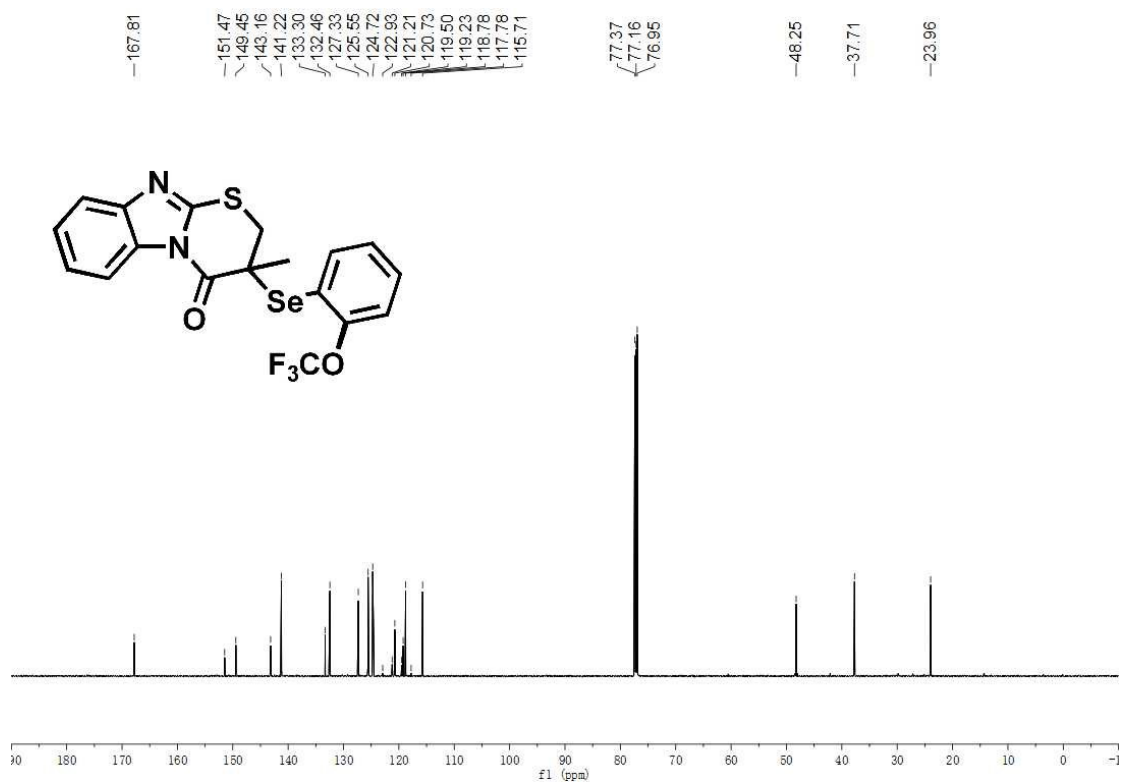

**<sup>19</sup>F NMR of product 4h in CDCl<sub>3</sub> (565 MHz)**

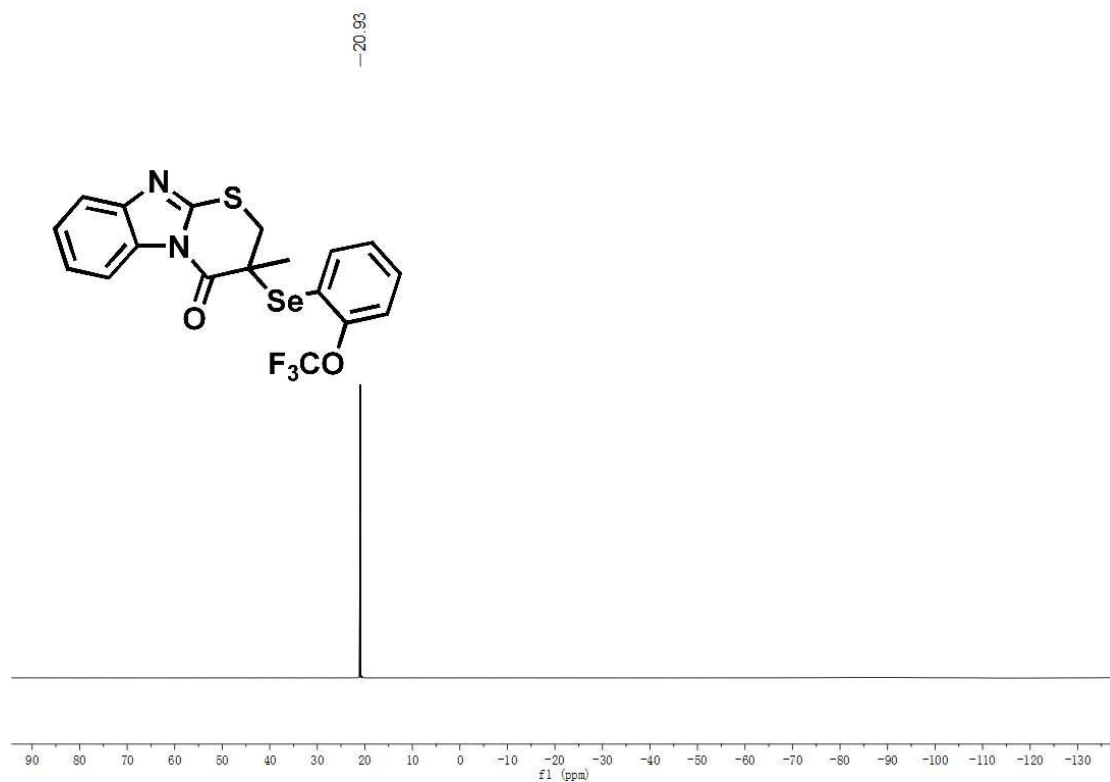

**<sup>1</sup>H NMR of product 4i in CDCl<sub>3</sub> (600 MHz)**

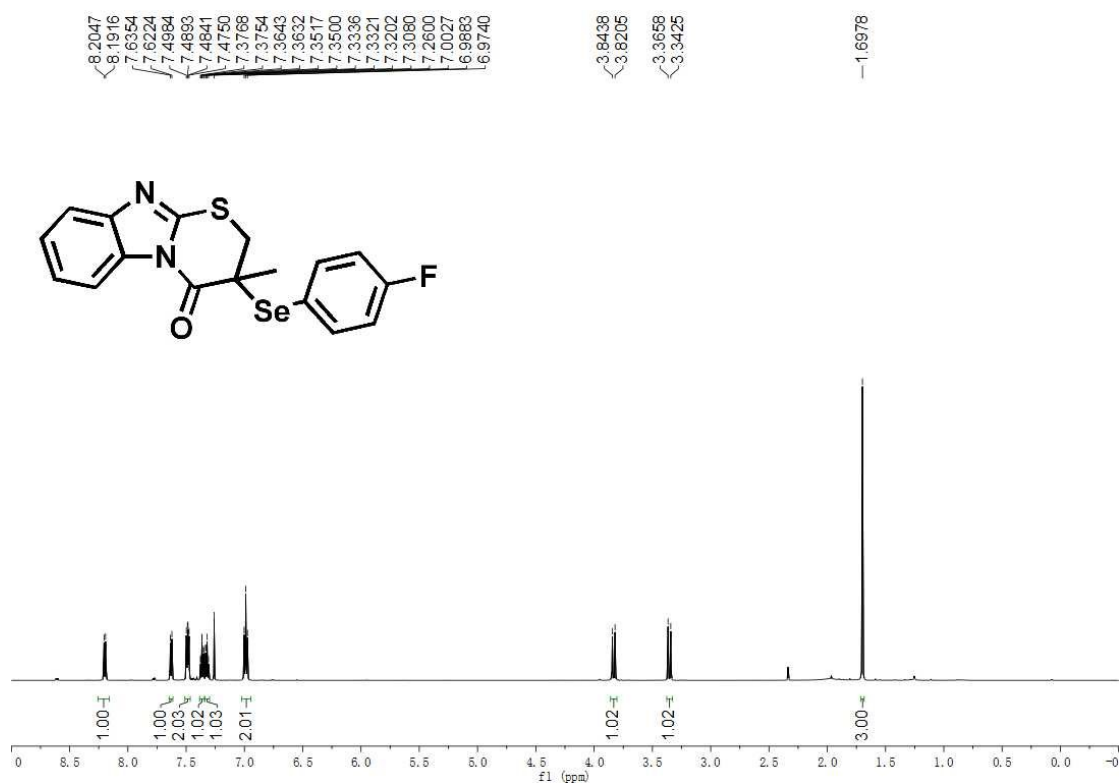



**<sup>13</sup>C NMR of product 4i in CDCl<sub>3</sub> (150 MHz)**

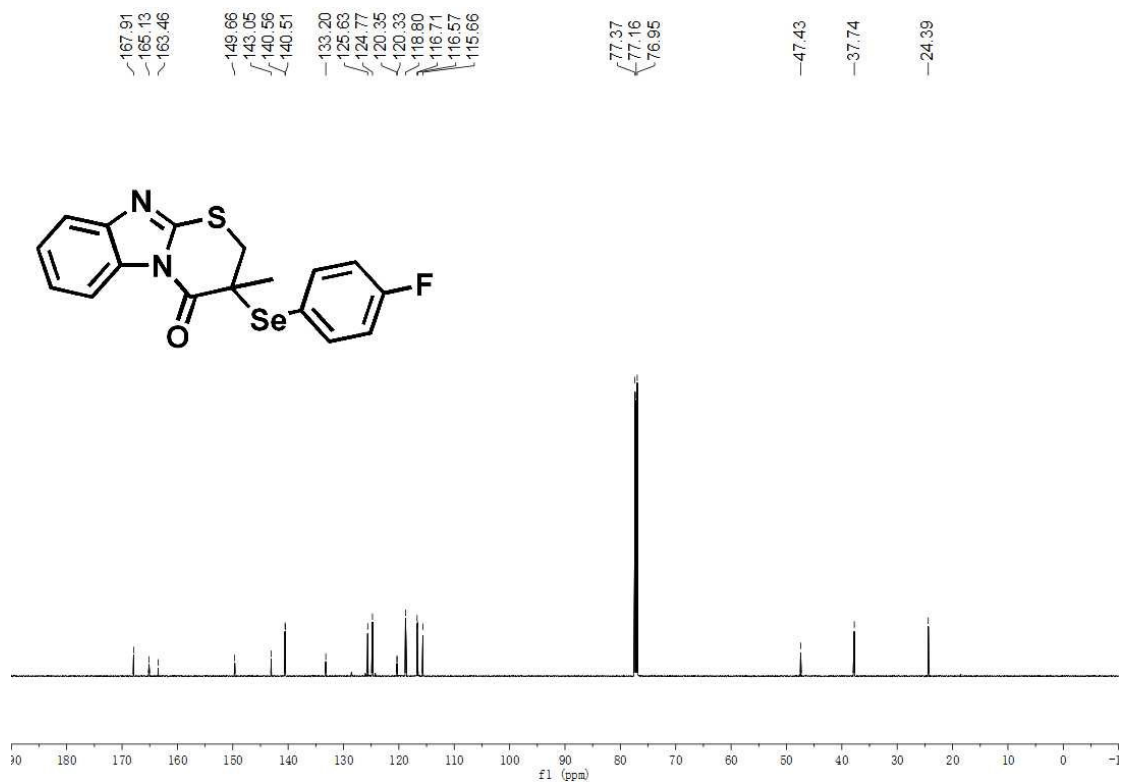

**<sup>19</sup>F NMR of product 4i in CDCl<sub>3</sub> (565 MHz)**

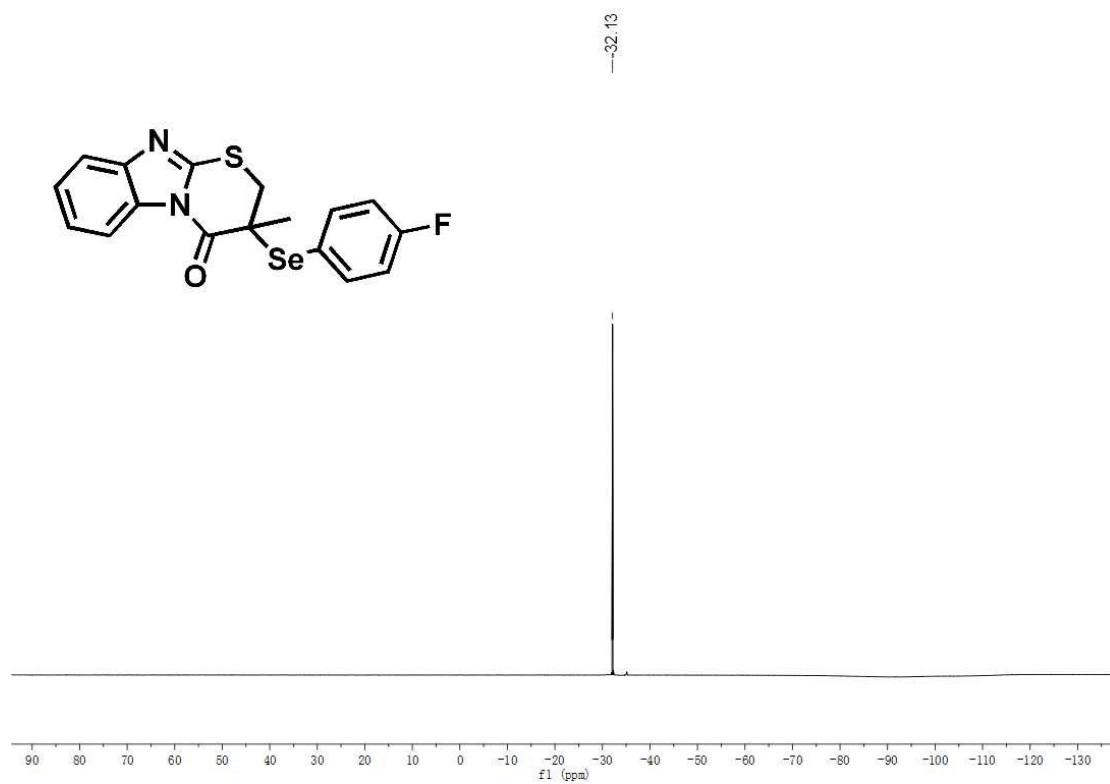

### $^1\text{H}$ NMR of product 4j in $\text{CDCl}_3$ (600 MHz)

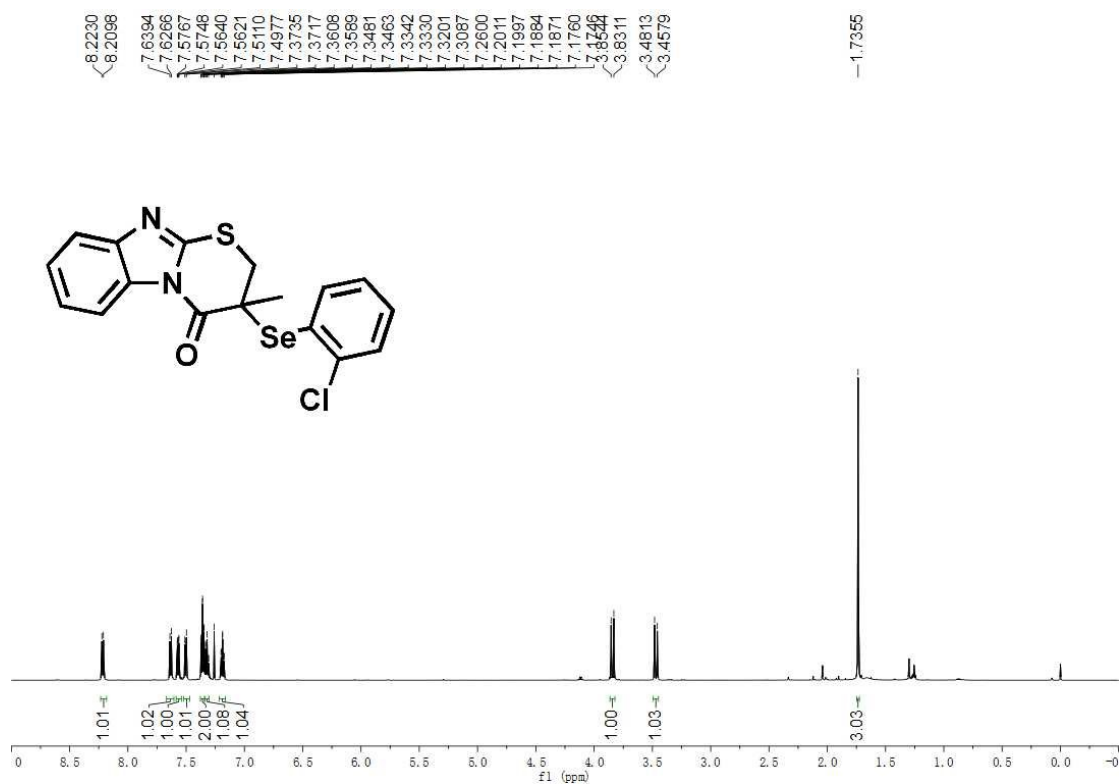

### $^{13}\text{C}$ NMR of product 4j in $\text{CDCl}_3$ (150 MHz)

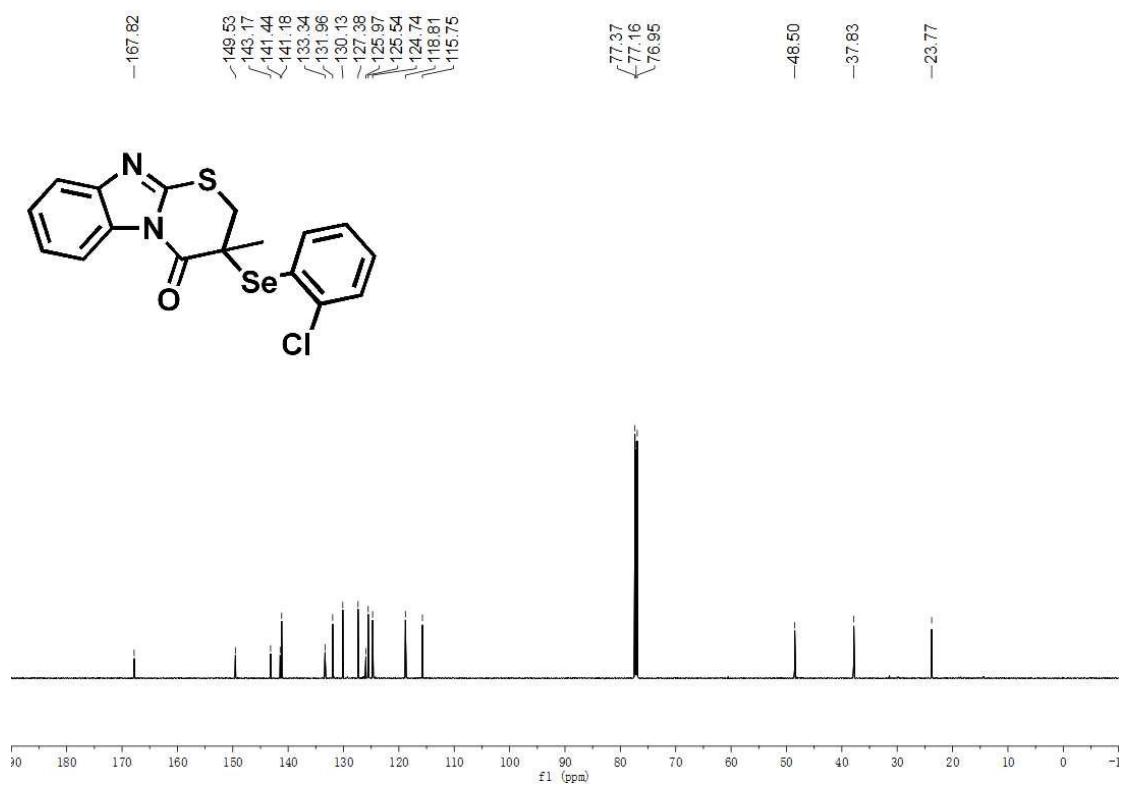

### $^1\text{H}$ NMR of product 4k in $\text{CDCl}_3$ (600 MHz)

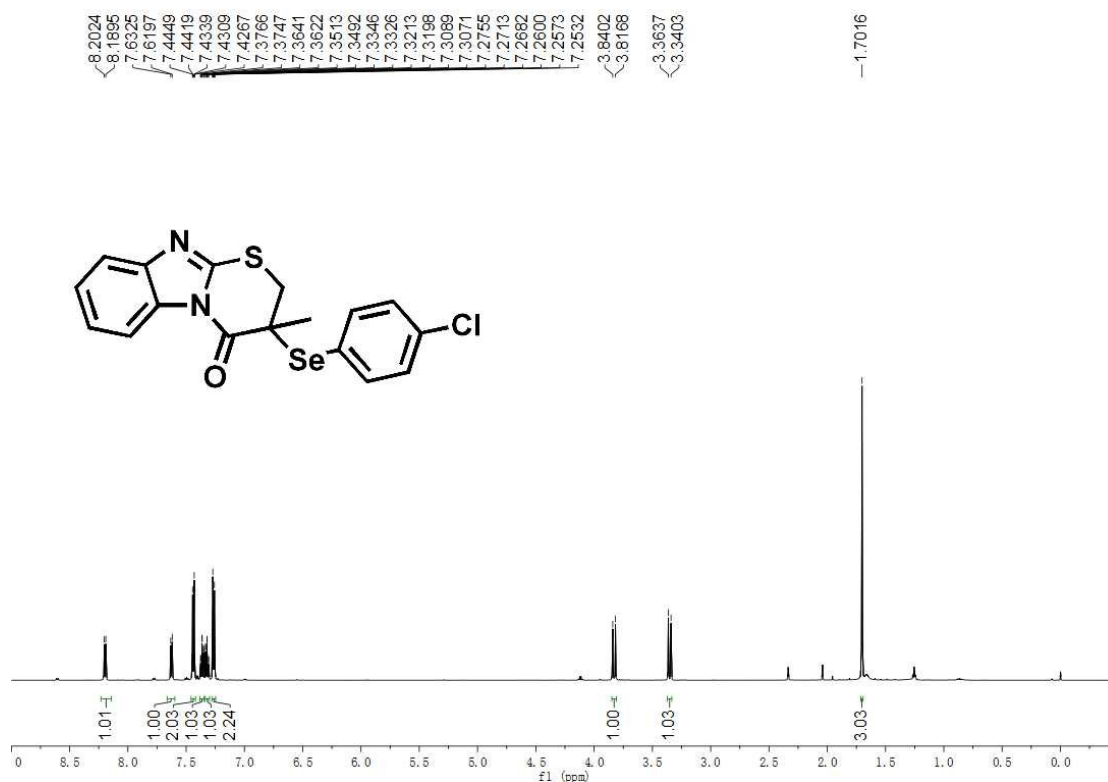

### $^{13}\text{C}$ NMR of product 4k in $\text{CDCl}_3$ (150 MHz)

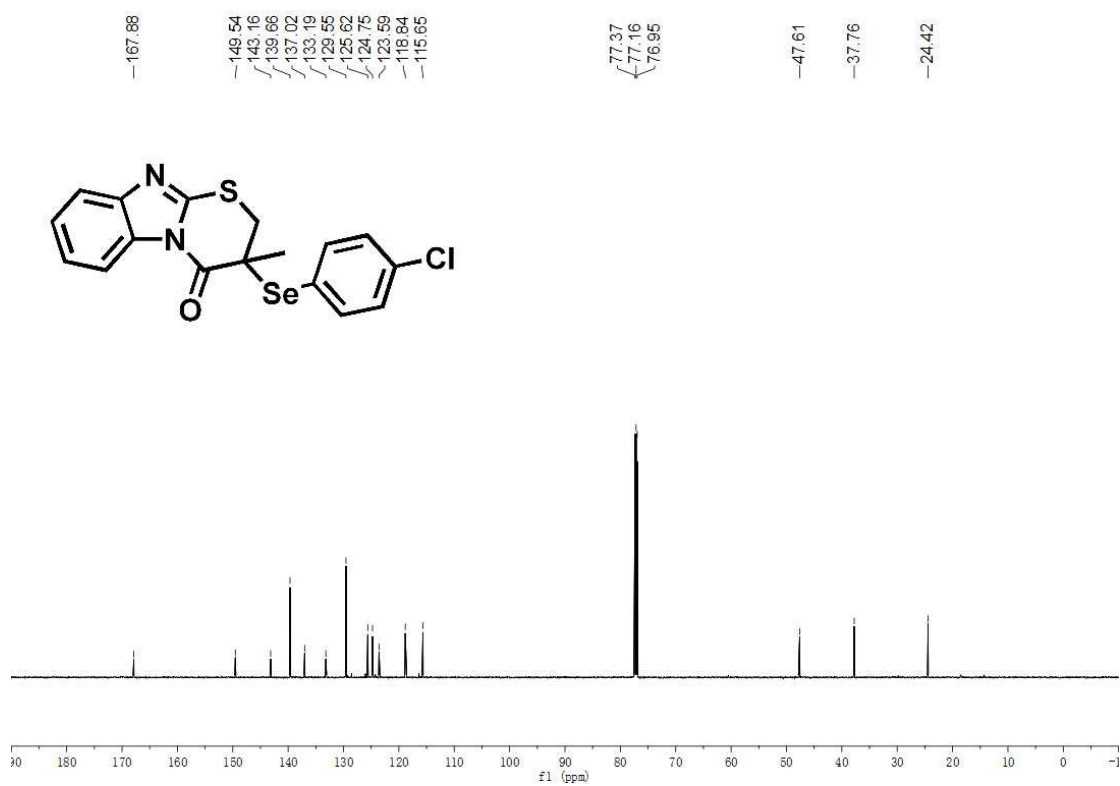

**<sup>1</sup>H NMR of product 4l in CDCl<sub>3</sub> (600 MHz)**

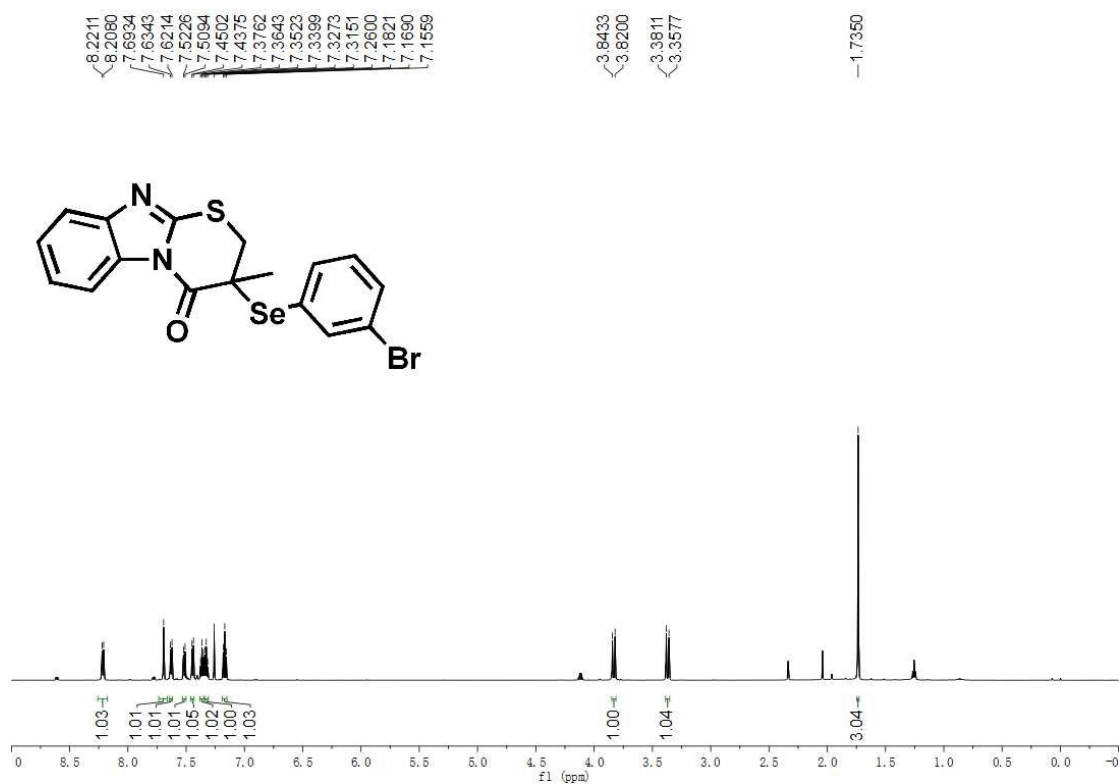

**<sup>13</sup>C NMR of product 4l in CDCl<sub>3</sub> (150 MHz)**

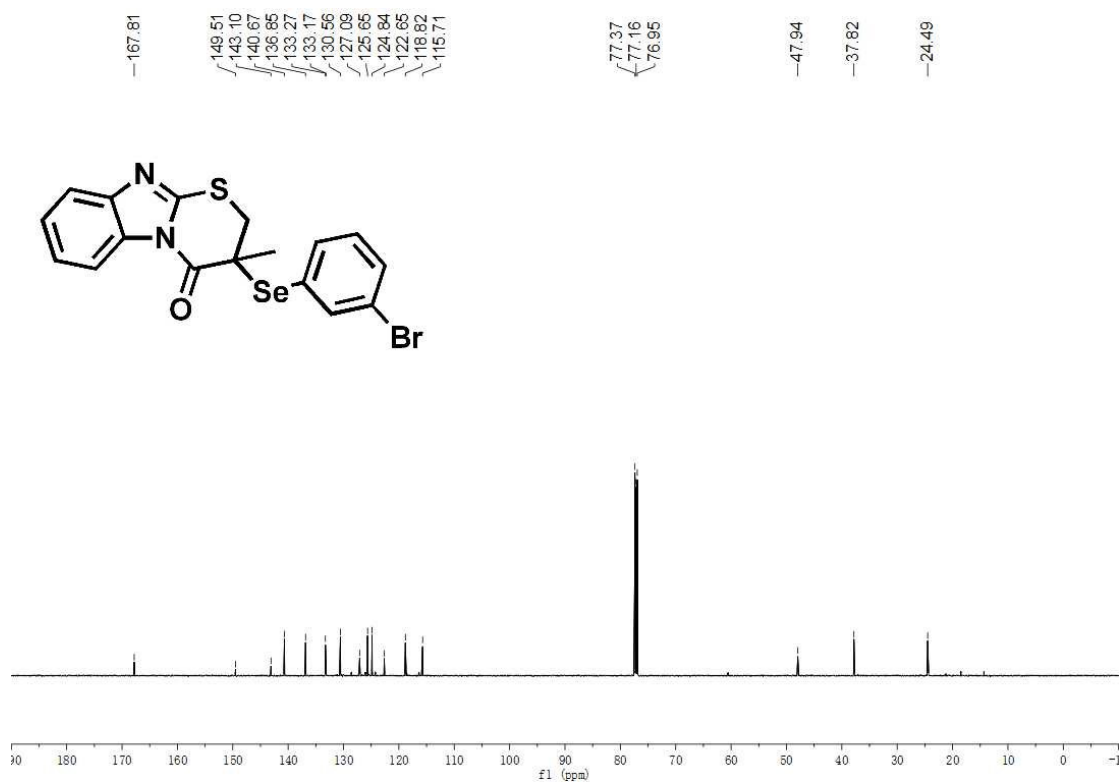

### $^1\text{H}$ NMR of product 4m in $\text{CDCl}_3$ (600 MHz)

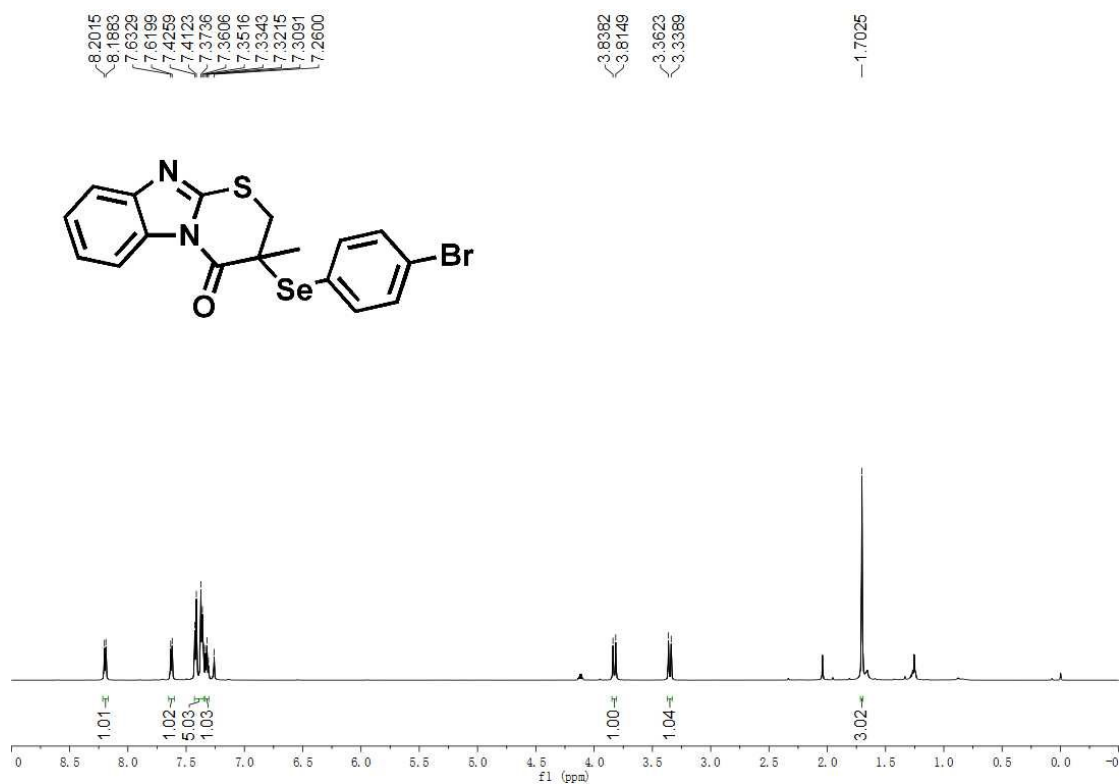

### $^{13}\text{C}$ NMR of product 4m in $\text{CDCl}_3$ (150 MHz)

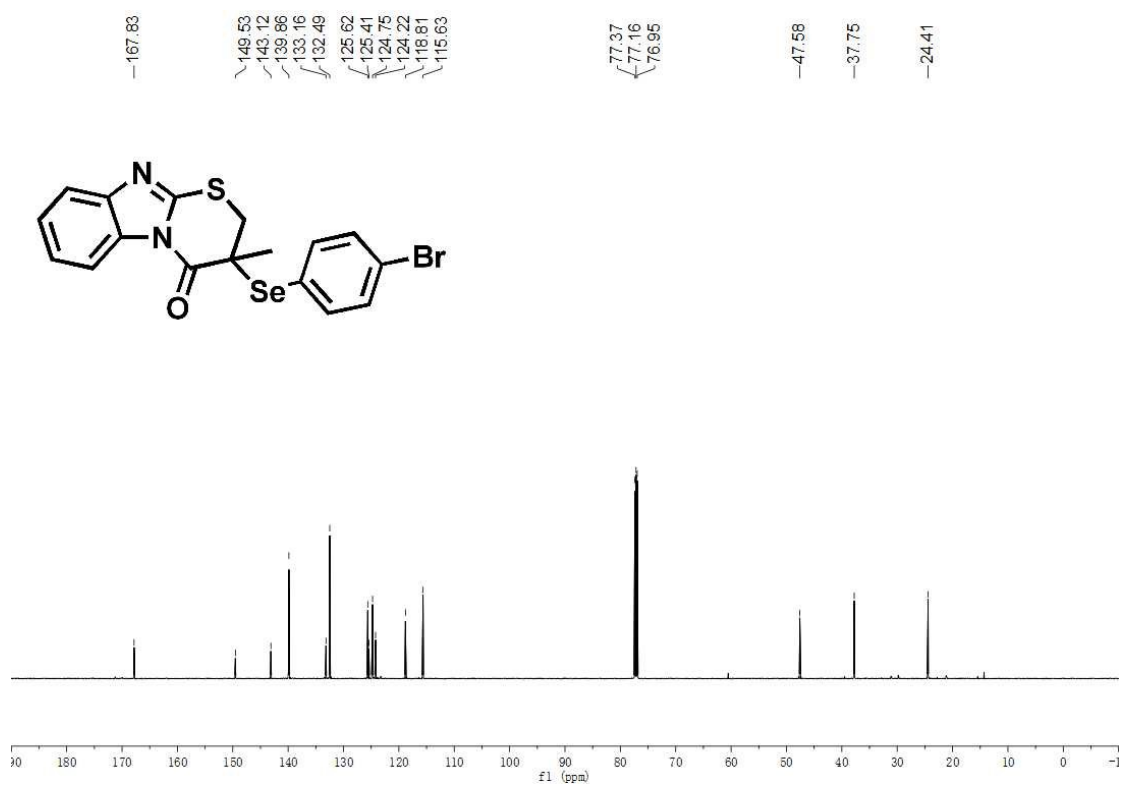

### <sup>1</sup>H NMR of product 4n in CDCl<sub>3</sub> (600 MHz)

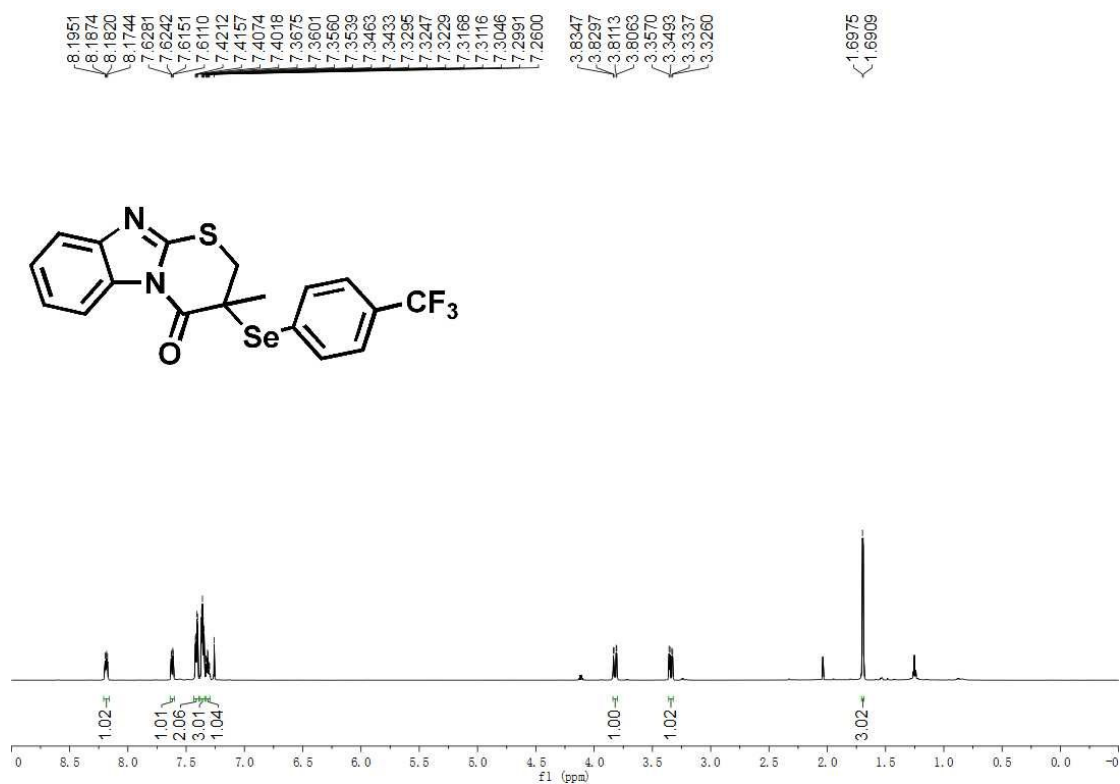

### <sup>13</sup>C NMR of product 4n in CDCl<sub>3</sub> (150 MHz)

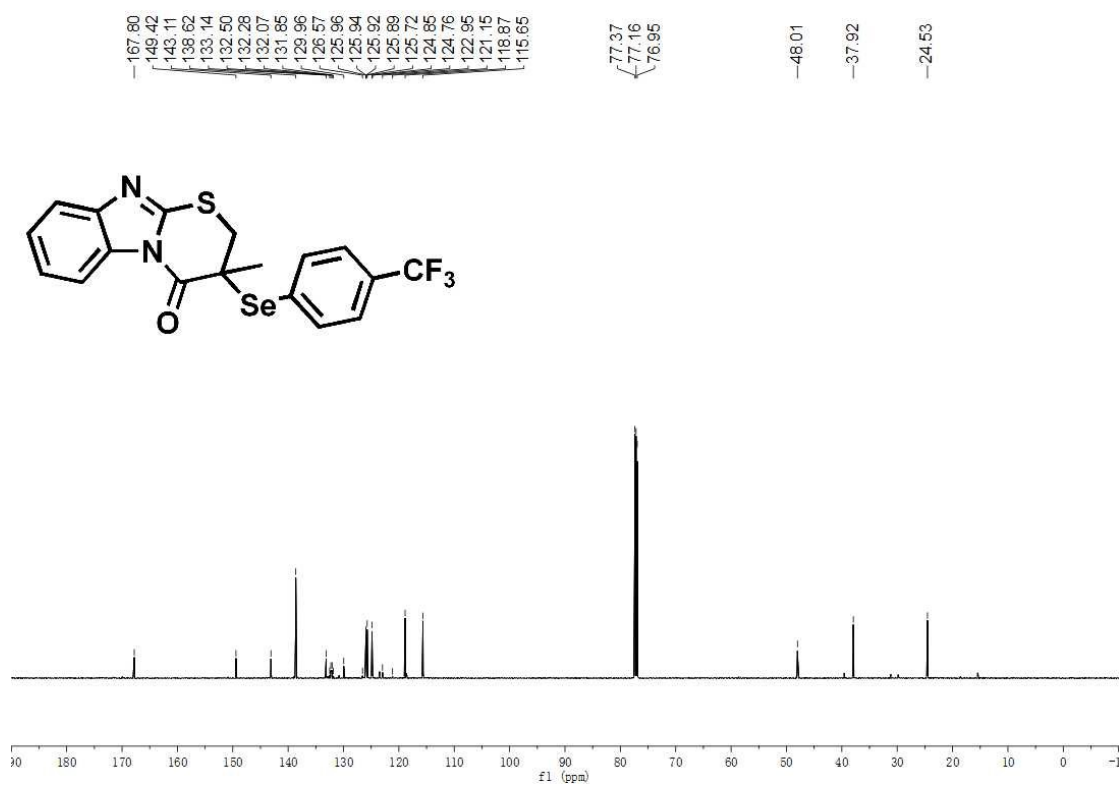

**<sup>19</sup>F NMR of product 4n in CDCl<sub>3</sub> (565 MHz)**

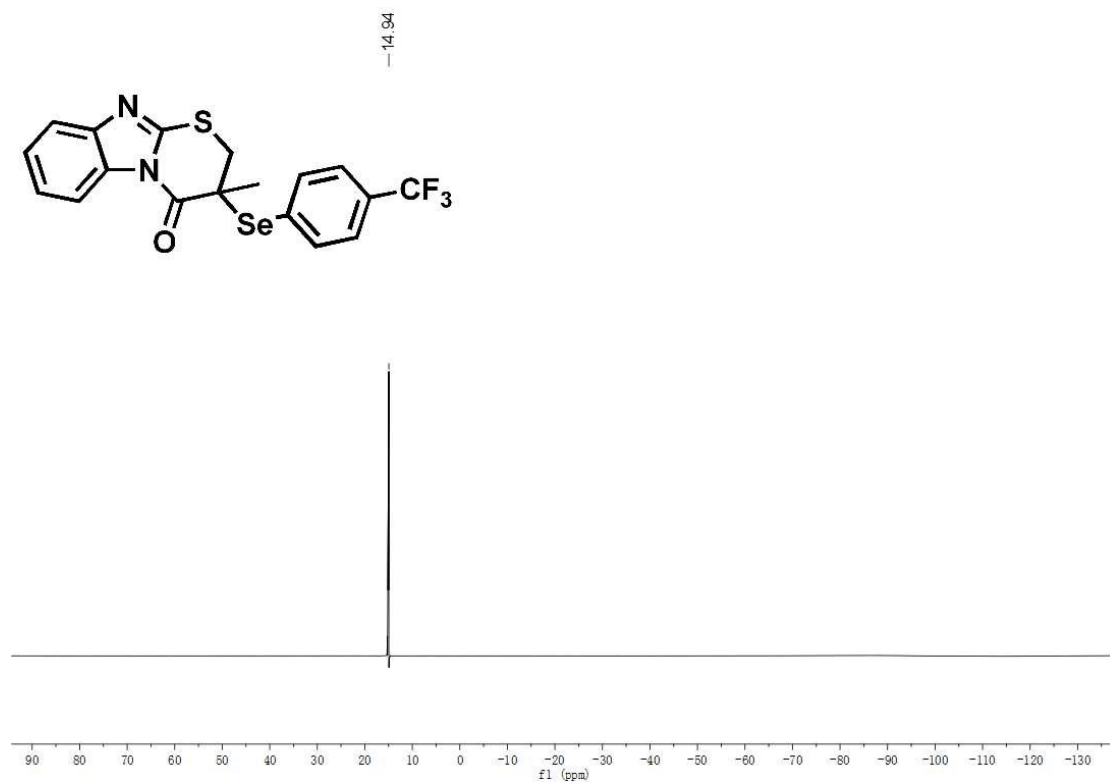

**<sup>1</sup>H NMR of product 4o in CDCl<sub>3</sub> (600 MHz)**

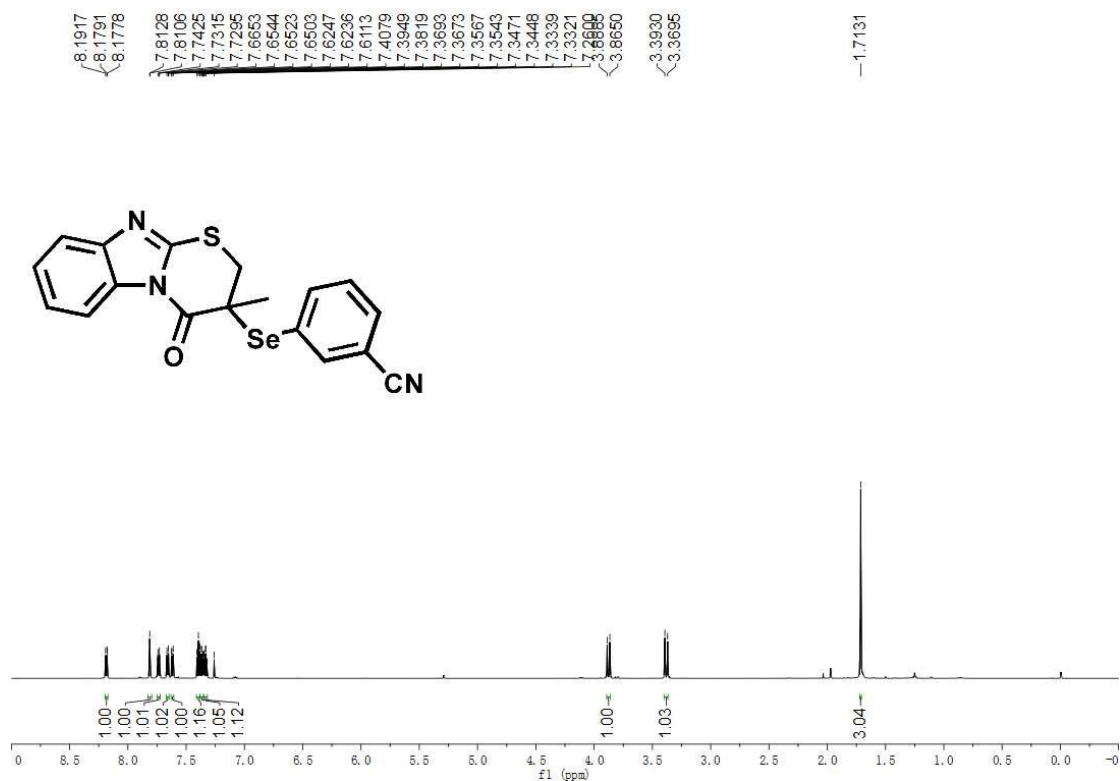

**$^{13}\text{C}$  NMR of product 4o in  $\text{CDCl}_3$  (150 MHz)**

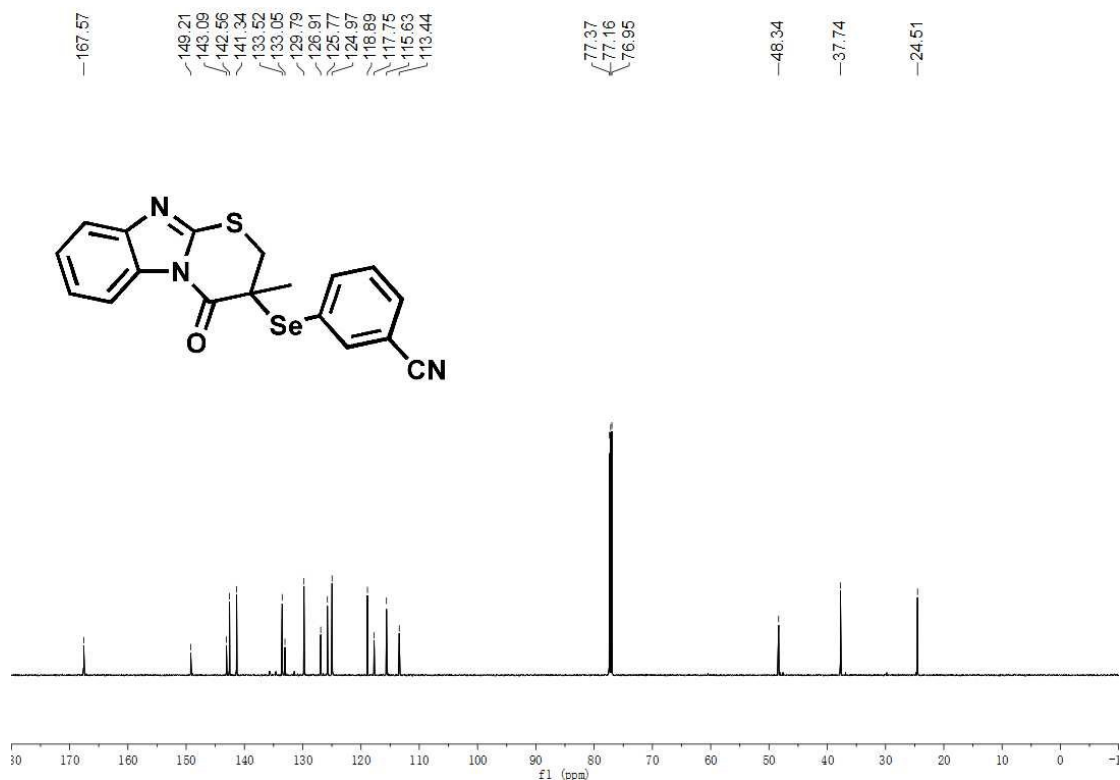

**$^1\text{H}$  NMR of product 4p in  $\text{CDCl}_3$  (600 MHz)**

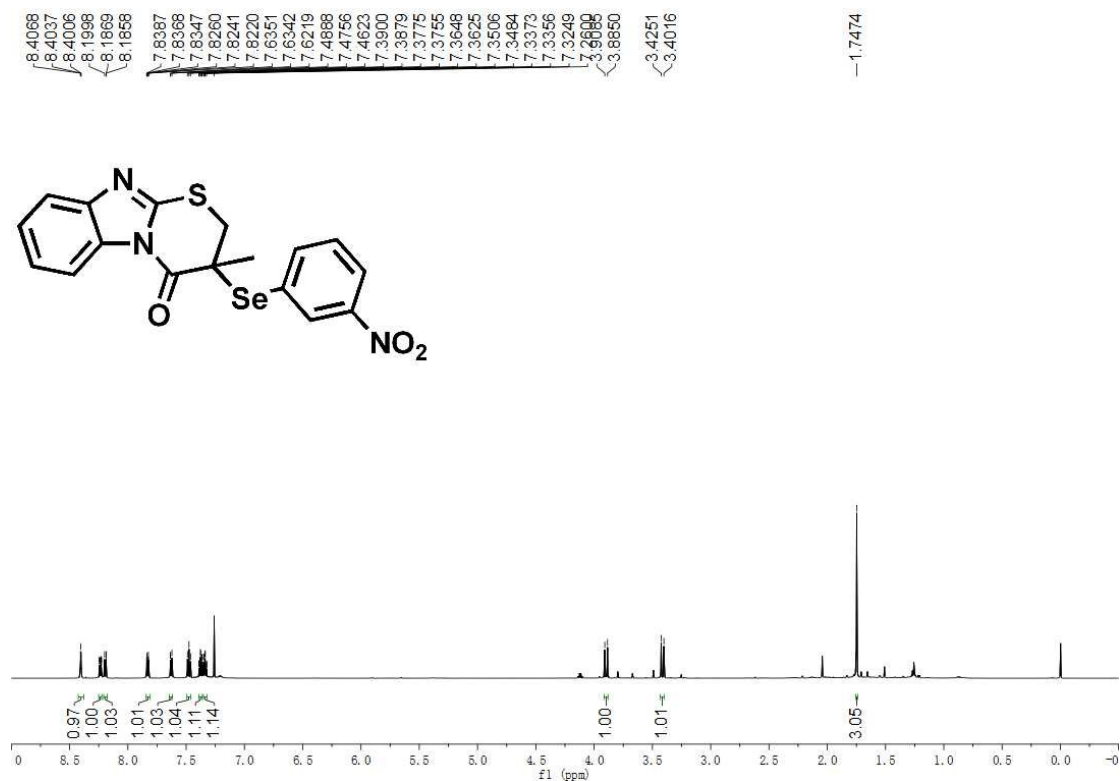



### <sup>13</sup>C NMR of product 4p in CDCl<sub>3</sub> (150 MHz)

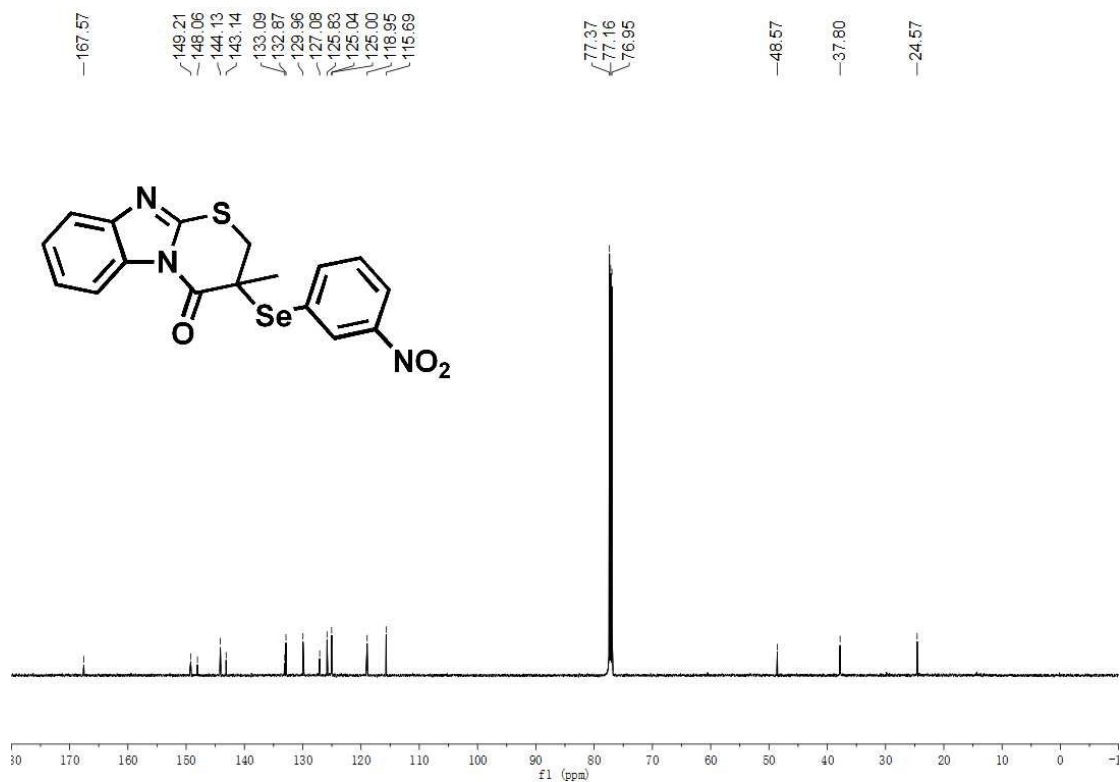

### <sup>1</sup>H NMR of product 4q in CDCl<sub>3</sub> (600 MHz)

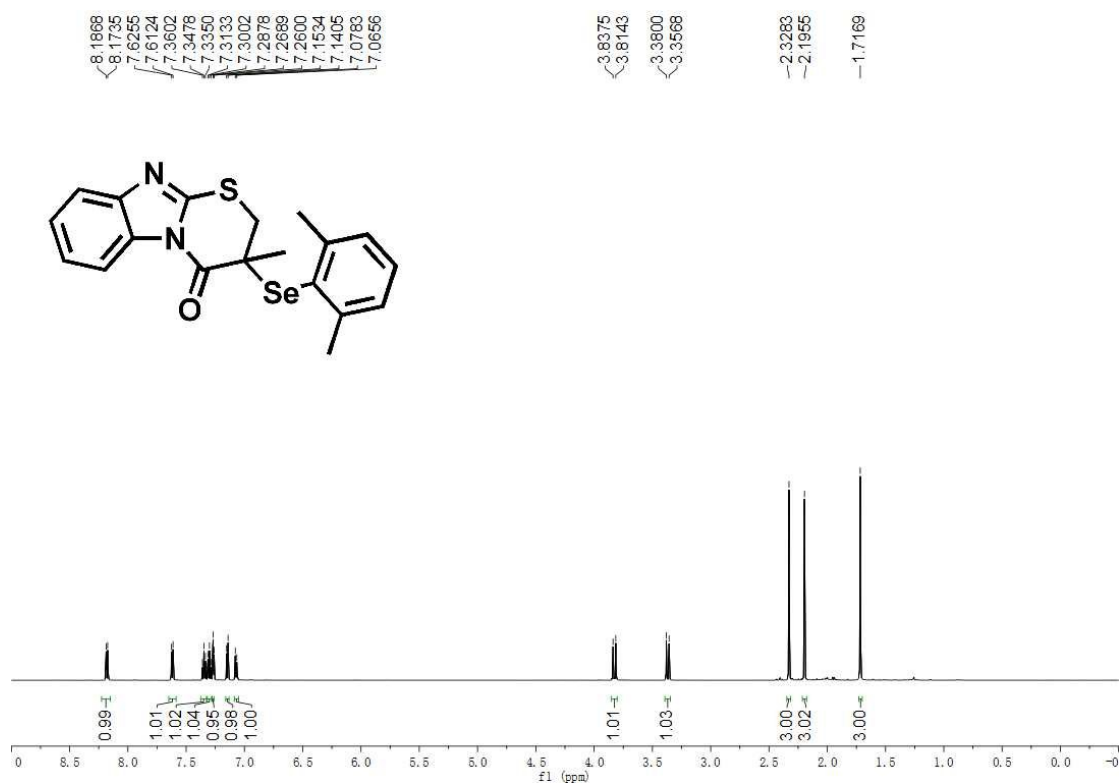

### <sup>13</sup>C NMR of product 4q in CDCl<sub>3</sub> (150 MHz)

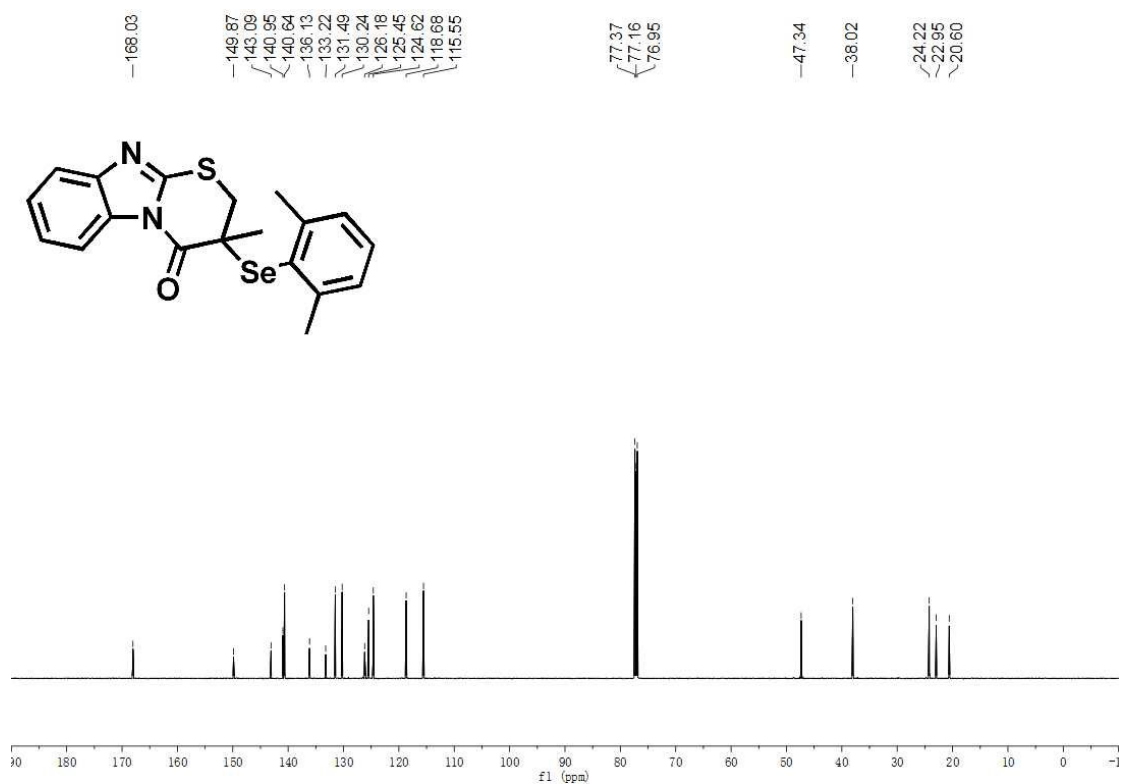

### <sup>1</sup>H NMR of product 4r in CDCl<sub>3</sub> (600 MHz)

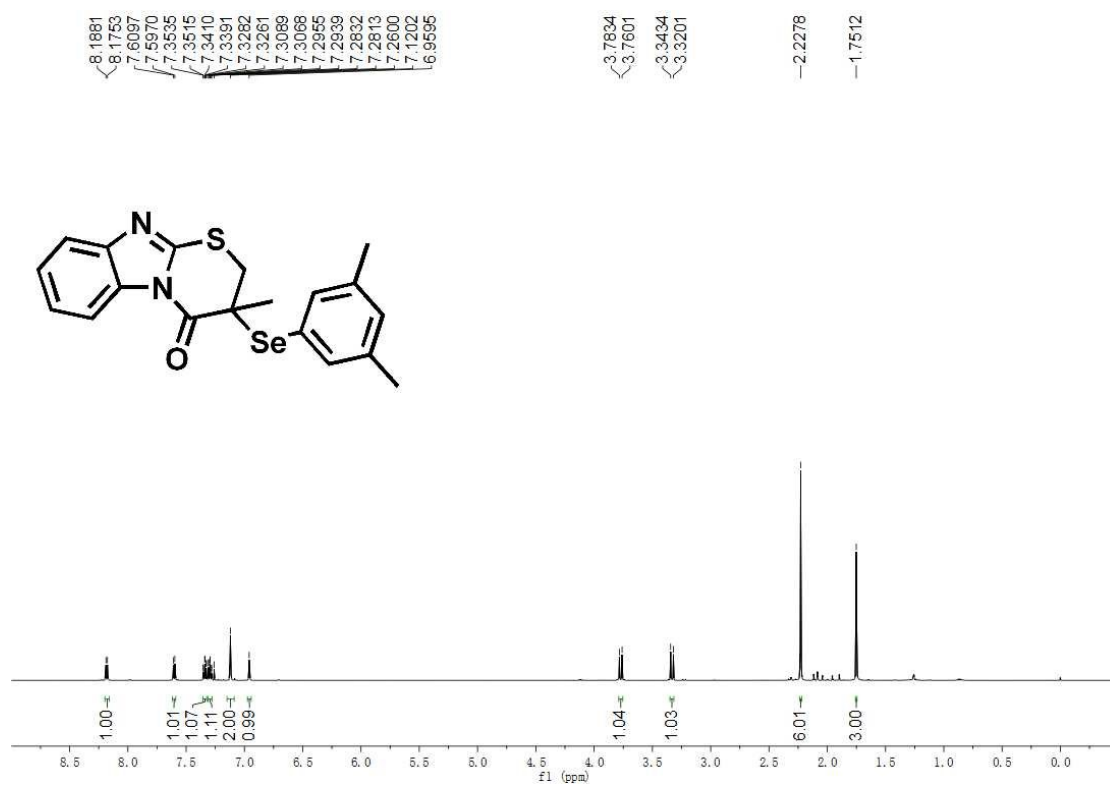

**$^{13}\text{C}$  NMR of product 4r in  $\text{CDCl}_3$  (150 MHz)**

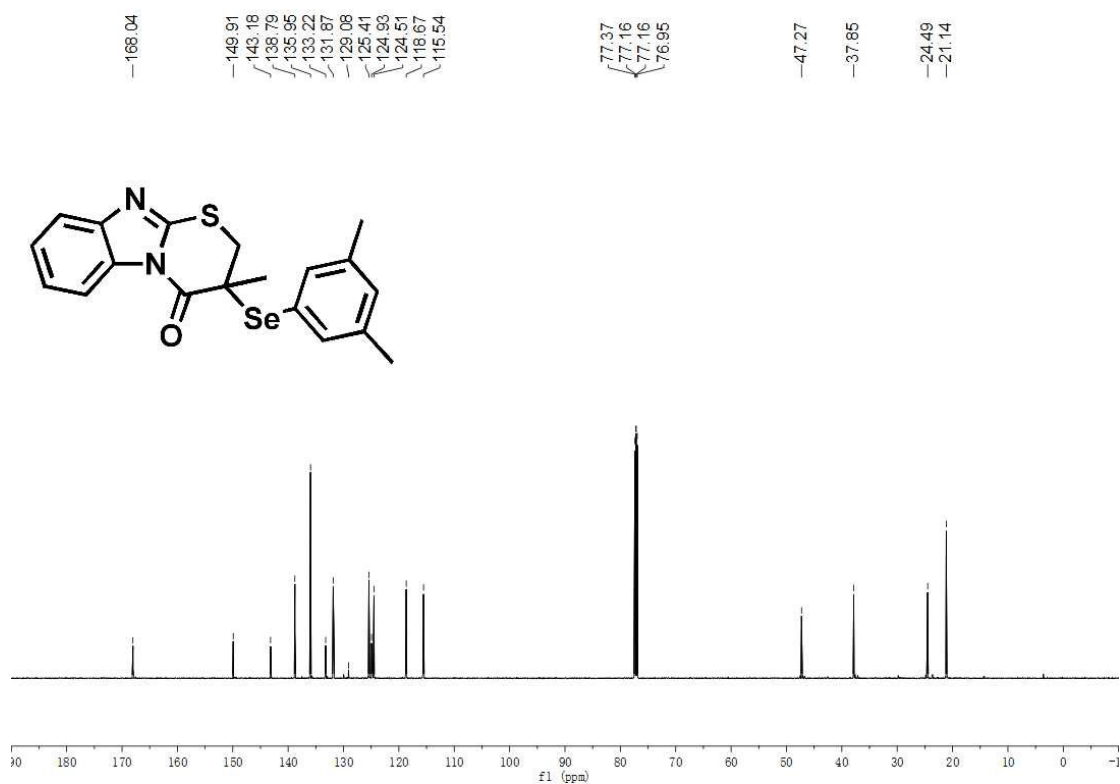

**$^1\text{H}$  NMR of product 4s in  $\text{CDCl}_3$  (600 MHz)**

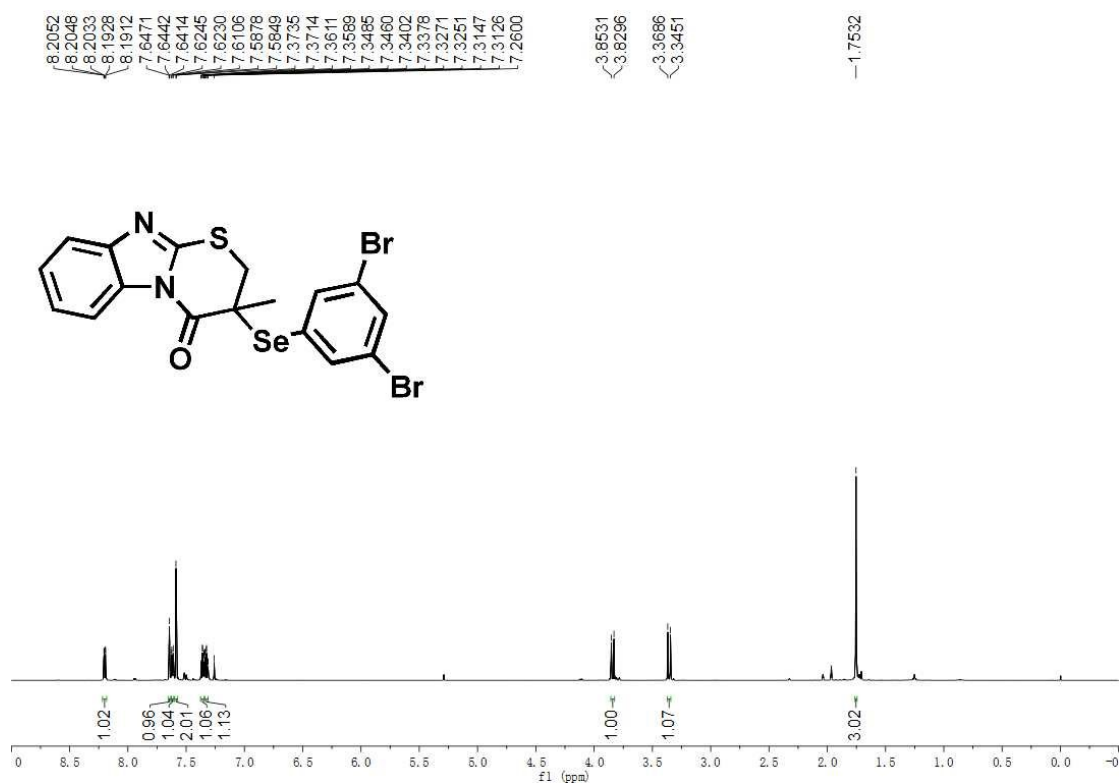

### $^{13}\text{C}$ NMR of product 4s in $\text{CDCl}_3$ (150 MHz)

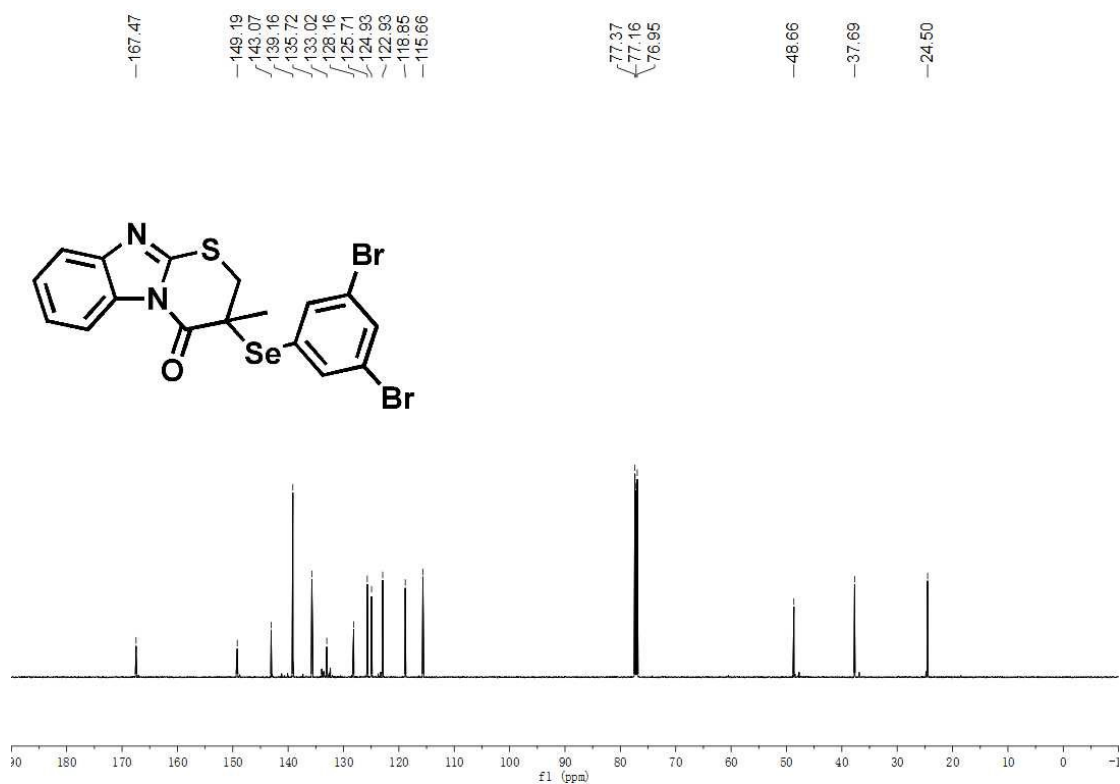

### $^1\text{H}$ NMR of product 4t in $\text{CDCl}_3$ (600 MHz)

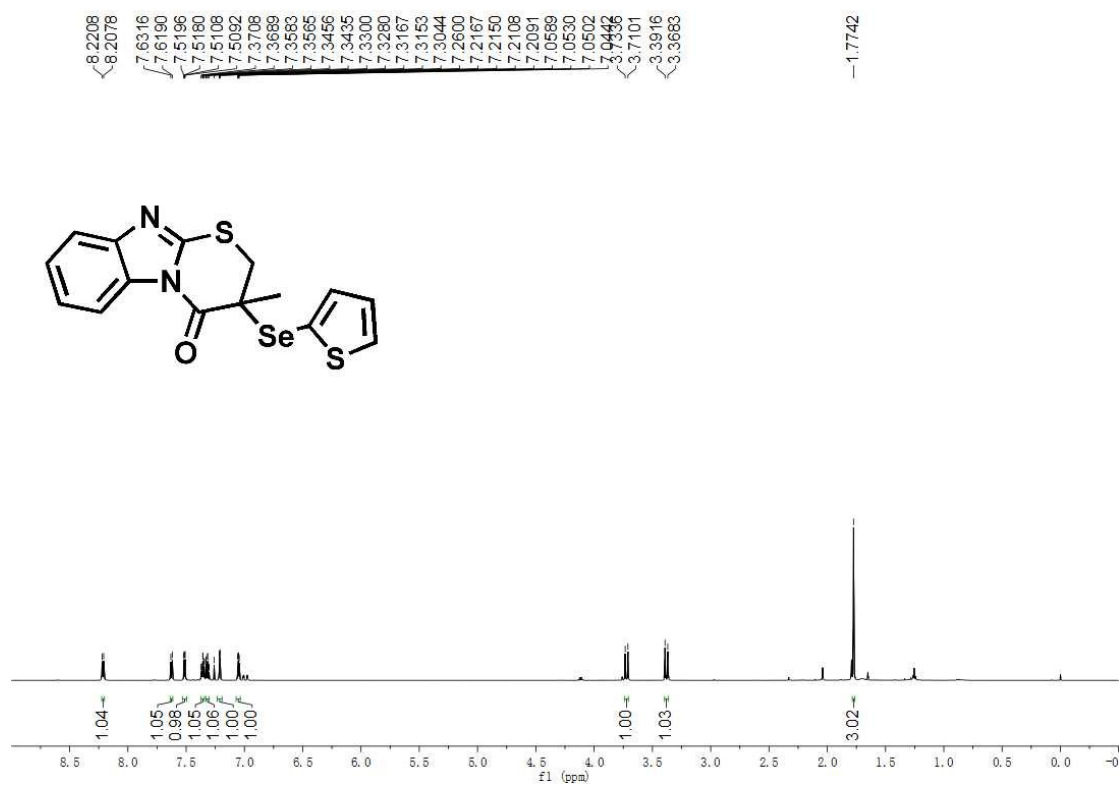

### <sup>13</sup>C NMR of product 4t in CDCl<sub>3</sub> (150 MHz)

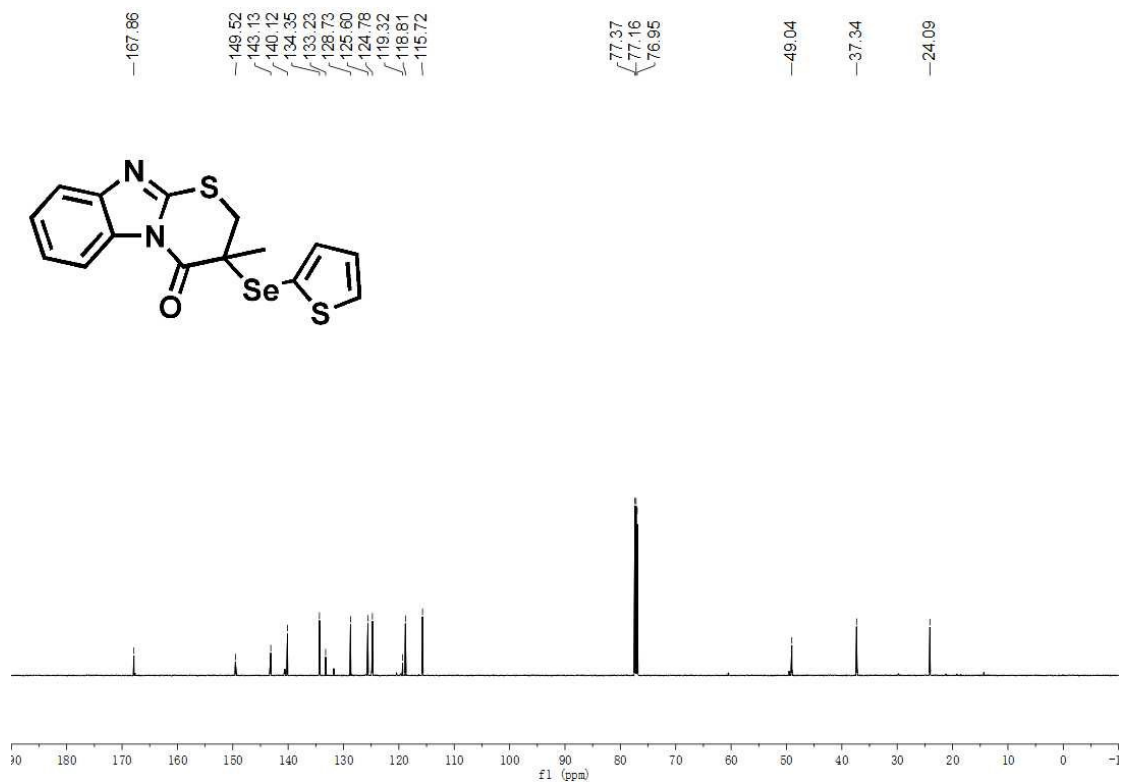

### <sup>1</sup>H NMR of product 4u in CDCl<sub>3</sub> (600 MHz)

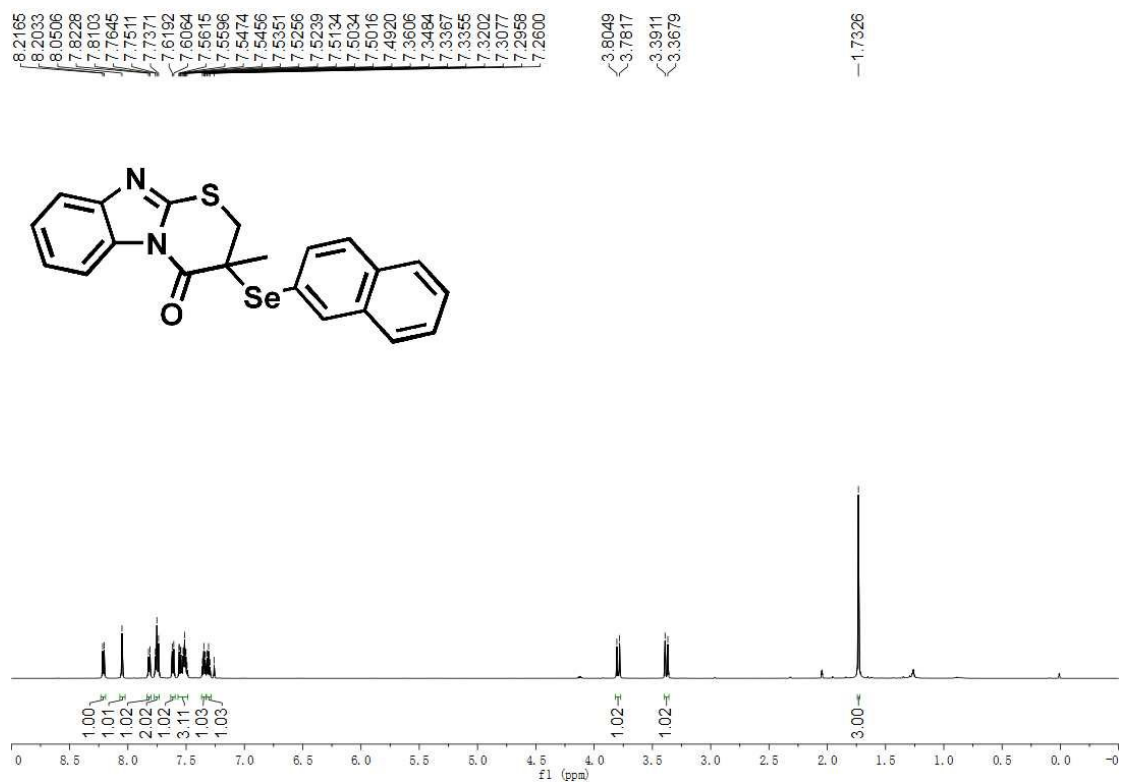

### <sup>13</sup>C NMR of product 4u in CDCl<sub>3</sub> (150 MHz)

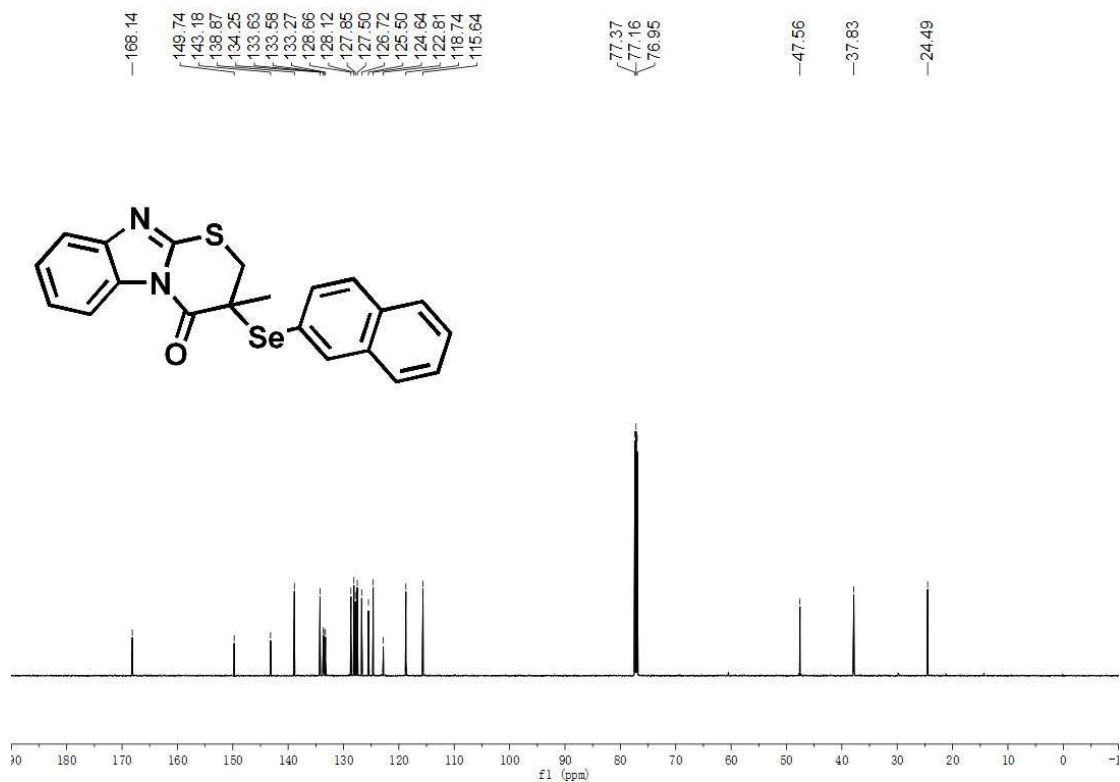

### <sup>1</sup>H NMR of product 4v in CDCl<sub>3</sub> (600 MHz)

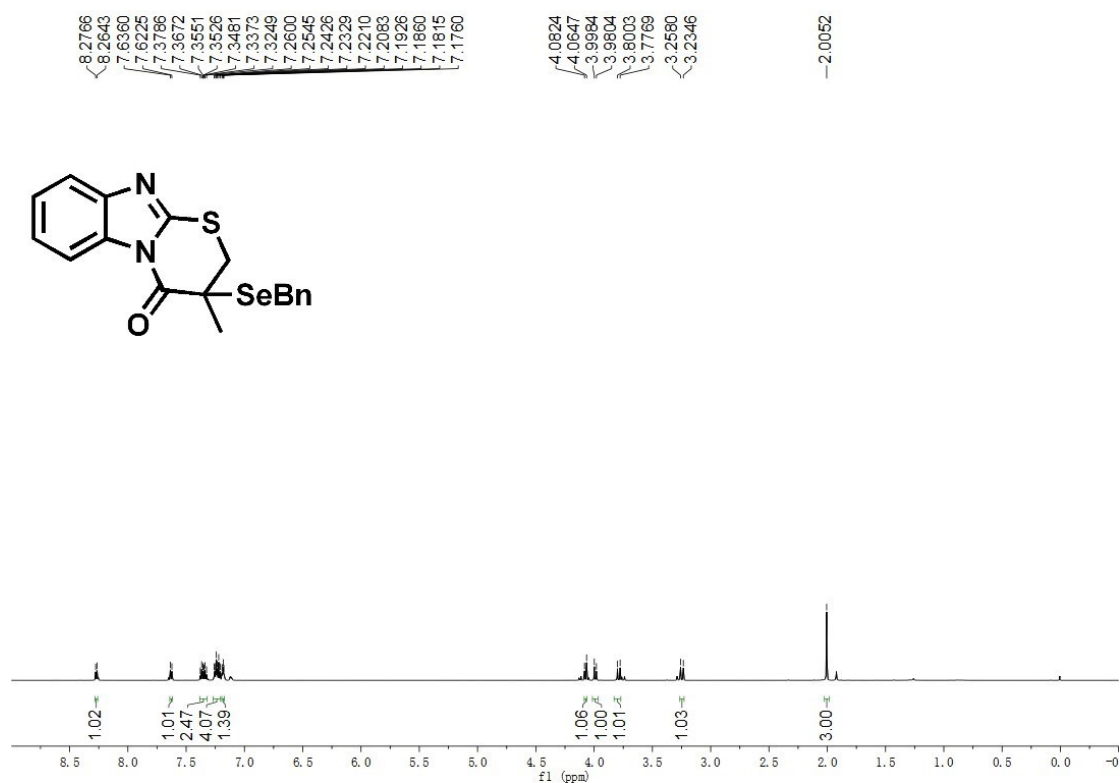

**<sup>13</sup>C NMR of product 4v in CDCl<sub>3</sub> (150 MHz)**

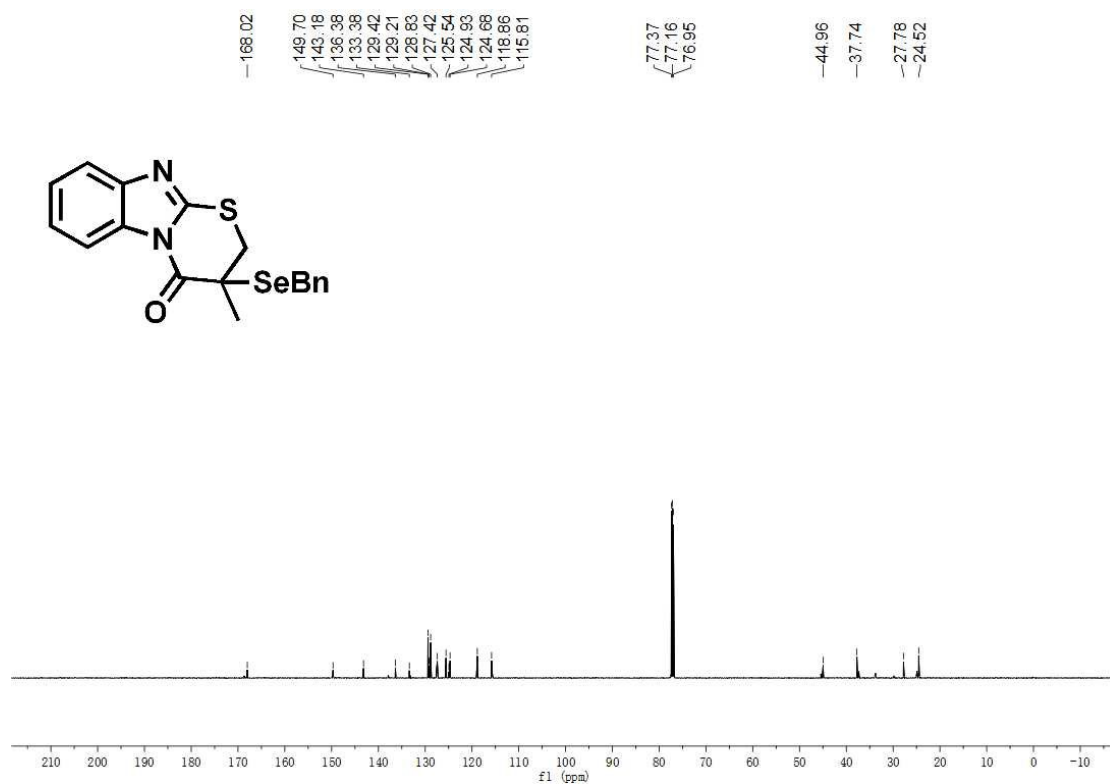

**<sup>1</sup>H NMR of product 4w in CDCl<sub>3</sub> (600 MHz)**

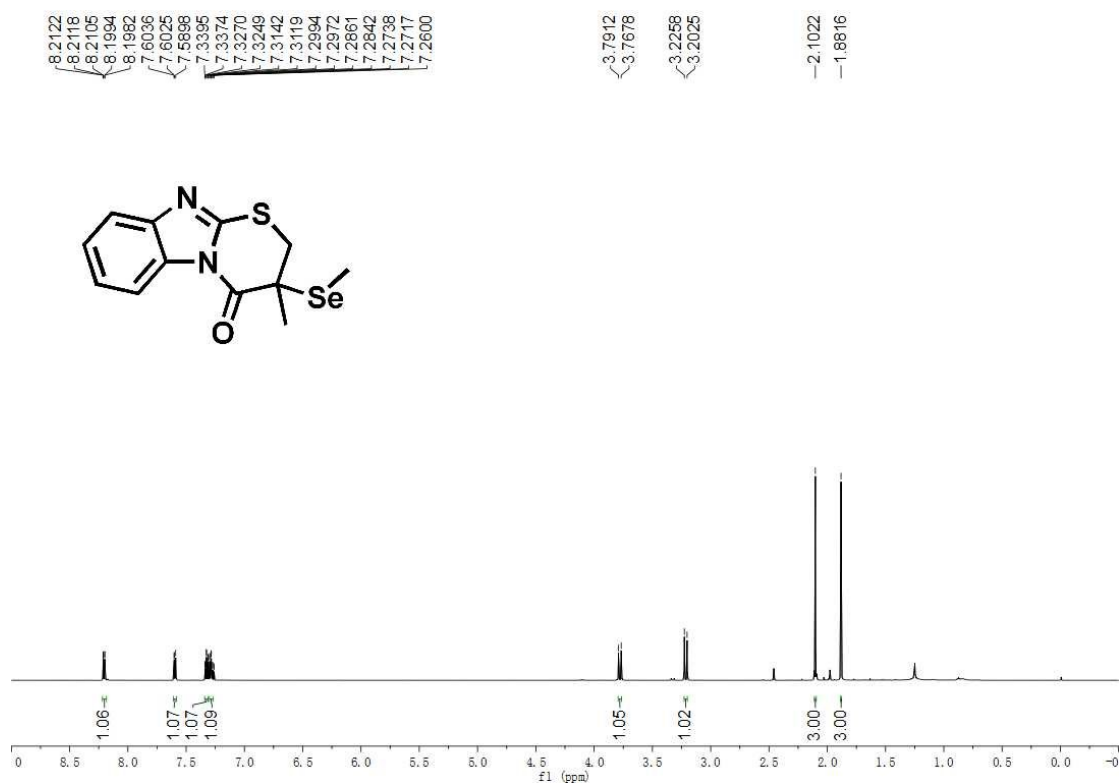

**<sup>13</sup>C NMR of product 4w in CDCl<sub>3</sub> (150 MHz)**

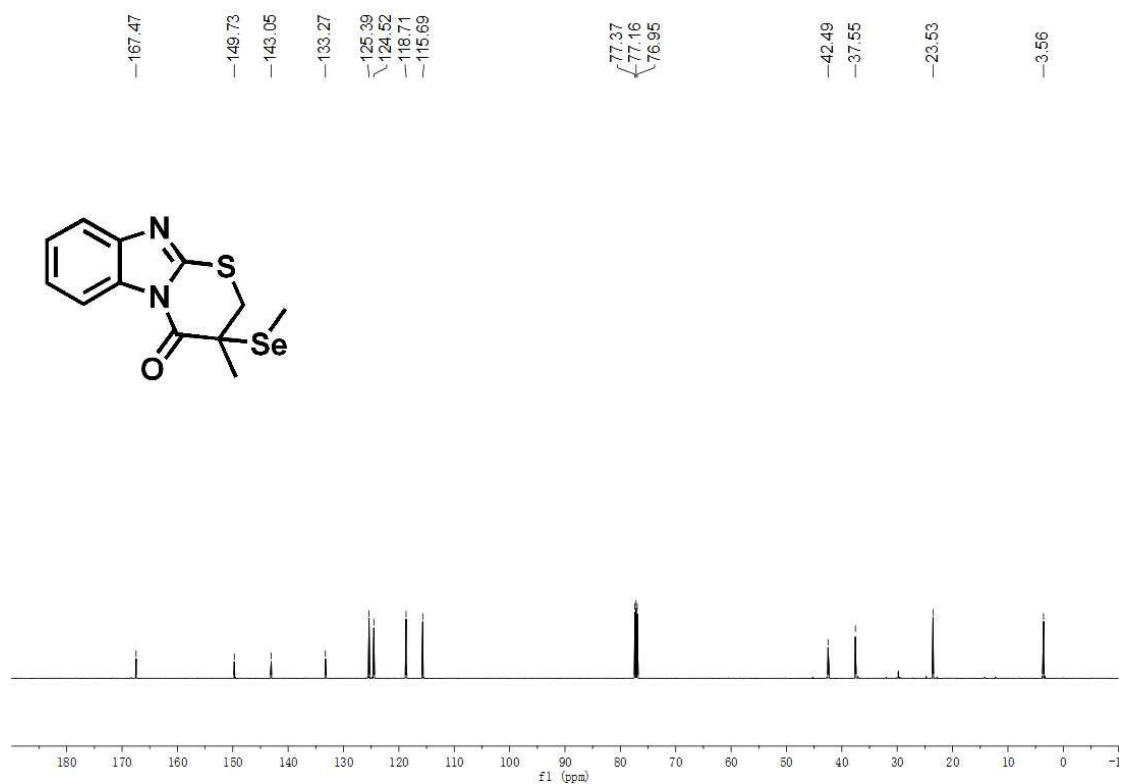

**<sup>1</sup>H NMR of product 5a in CDCl<sub>3</sub> (600 MHz)**

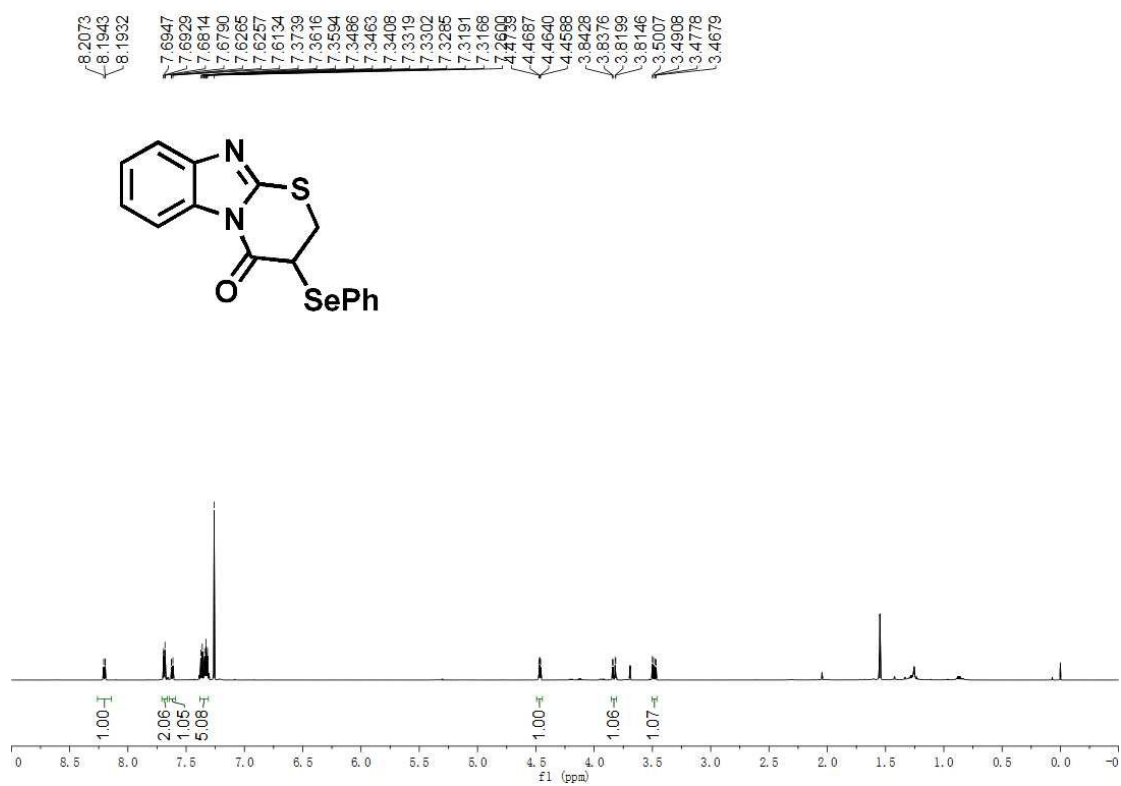



**<sup>13</sup>C NMR of product 5a in CDCl<sub>3</sub> (150 MHz)**

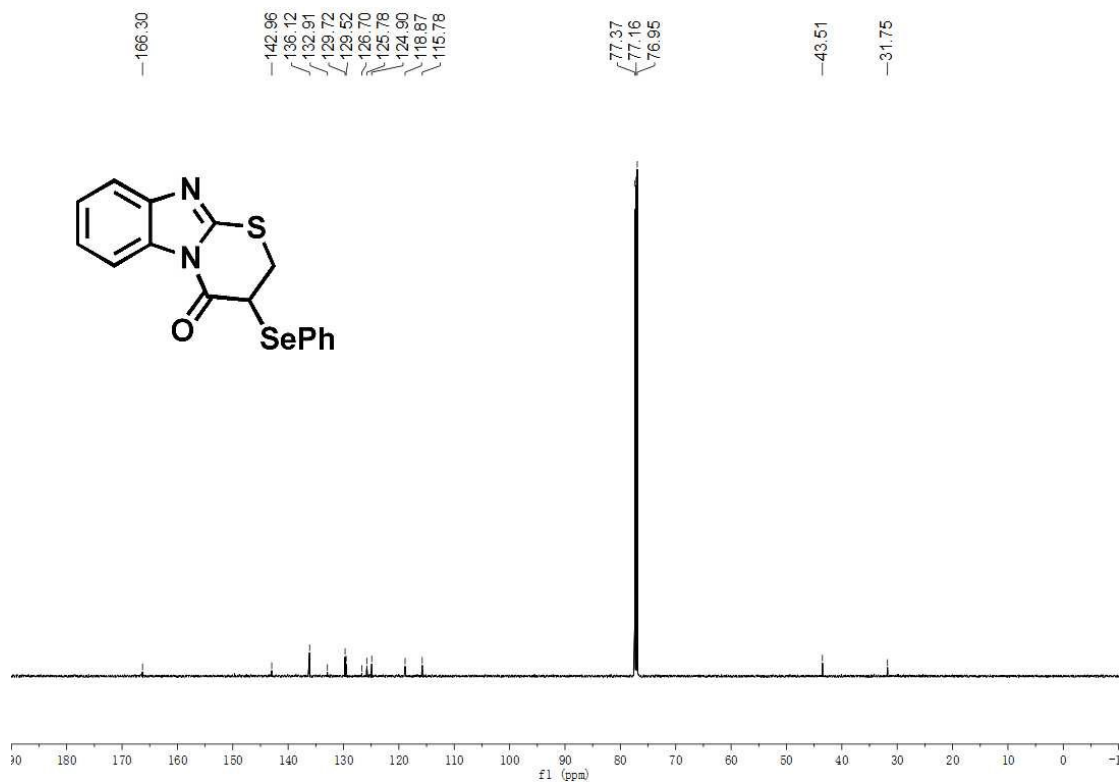

**<sup>1</sup>H NMR of product 5b in CDCl<sub>3</sub> (600 MHz)**

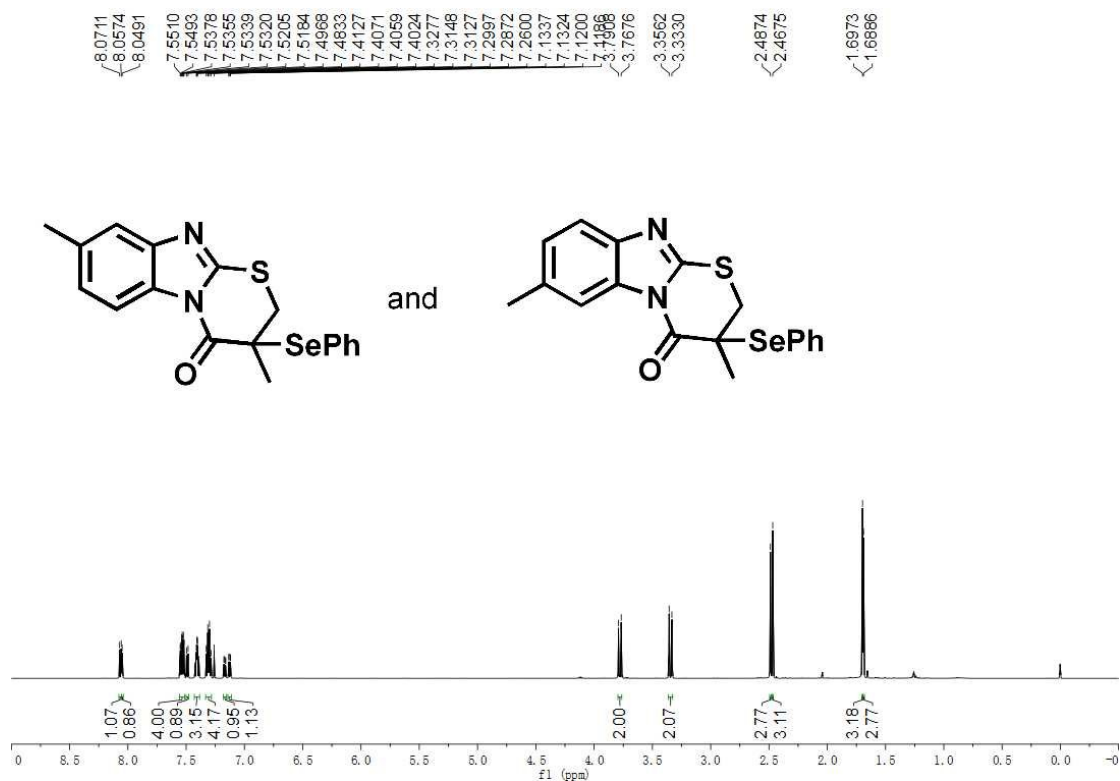

### $^{13}\text{C}$ NMR of product 5b in $\text{CDCl}_3$ (150 MHz)

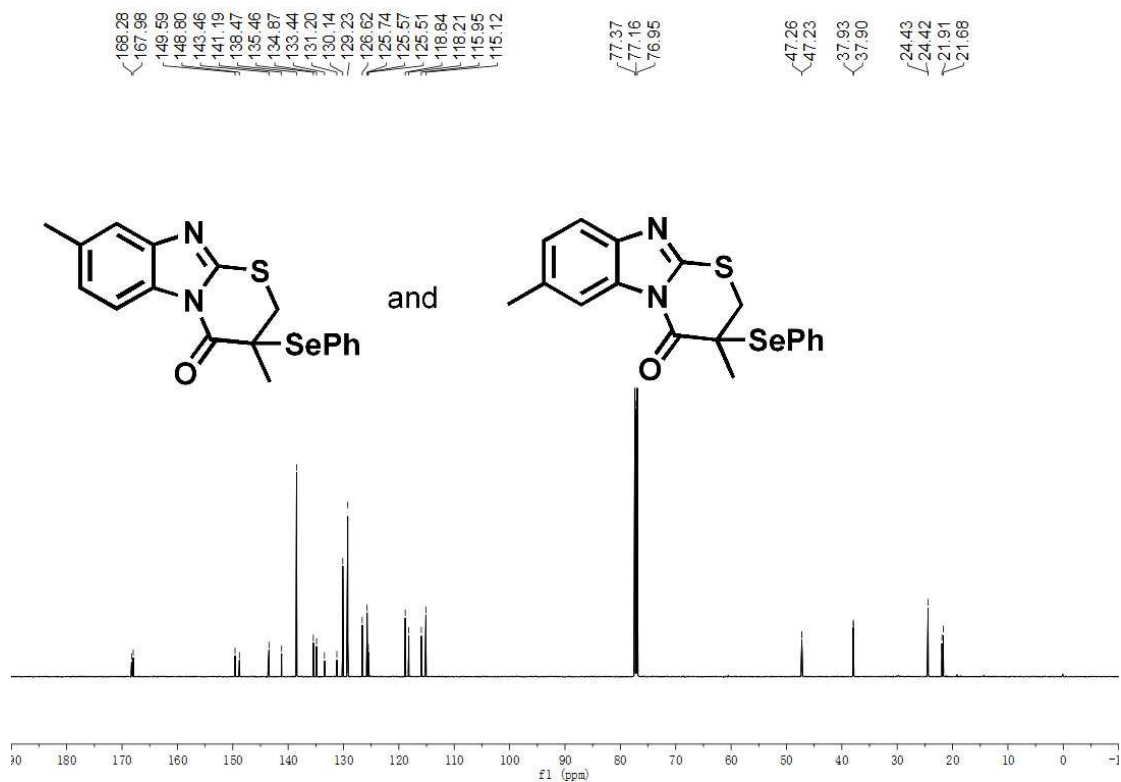

### $^1\text{H}$ NMR of product 5c in $\text{CDCl}_3$ (600 MHz)

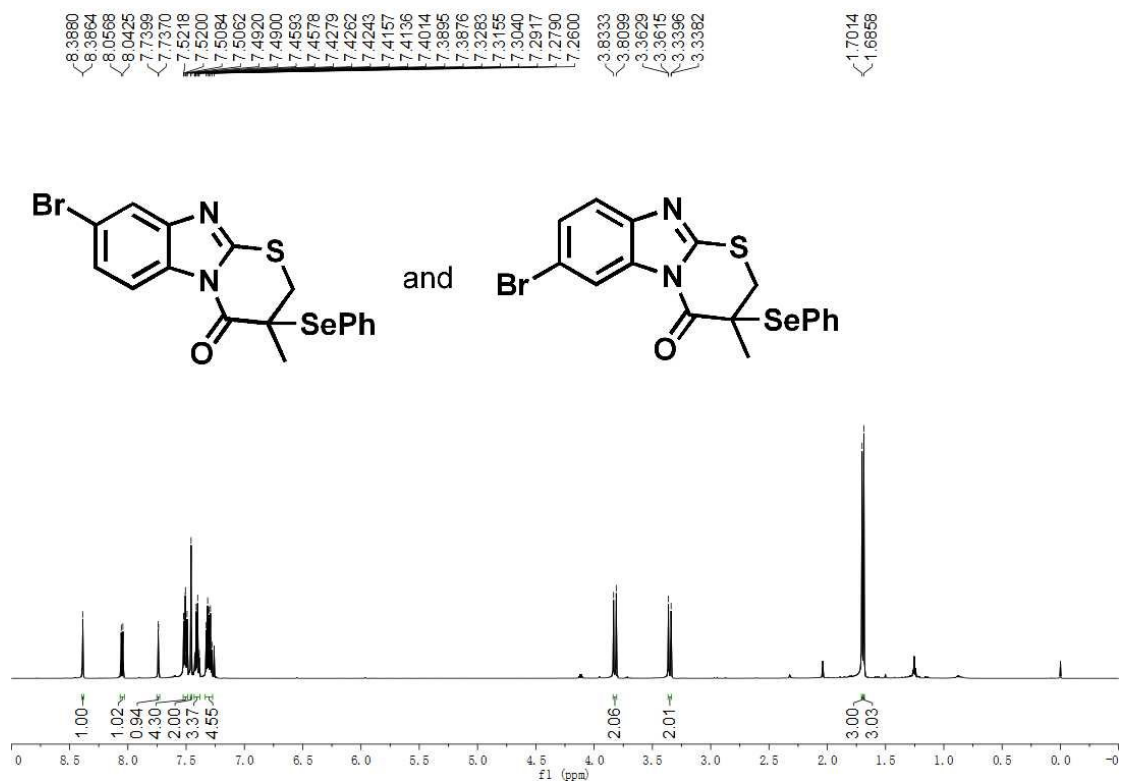

### <sup>13</sup>C NMR of product 5c in CDCl<sub>3</sub> (150 MHz)

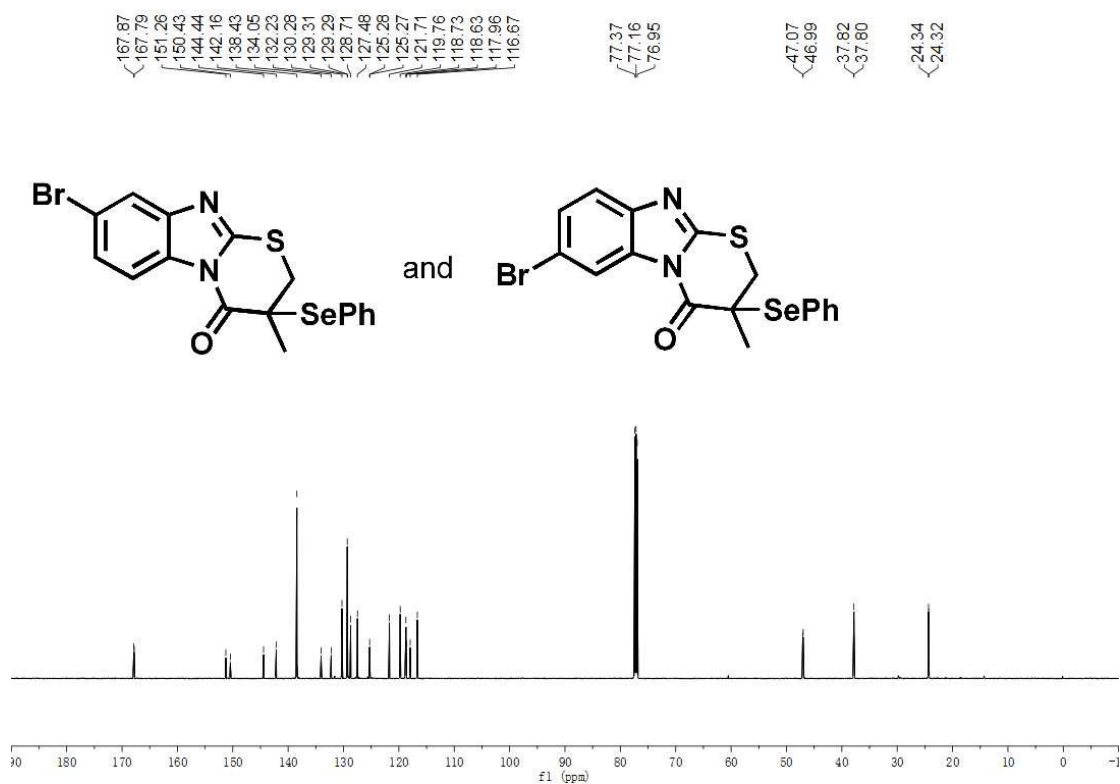

### <sup>1</sup>H NMR of product 5d in CDCl<sub>3</sub> (600 MHz)

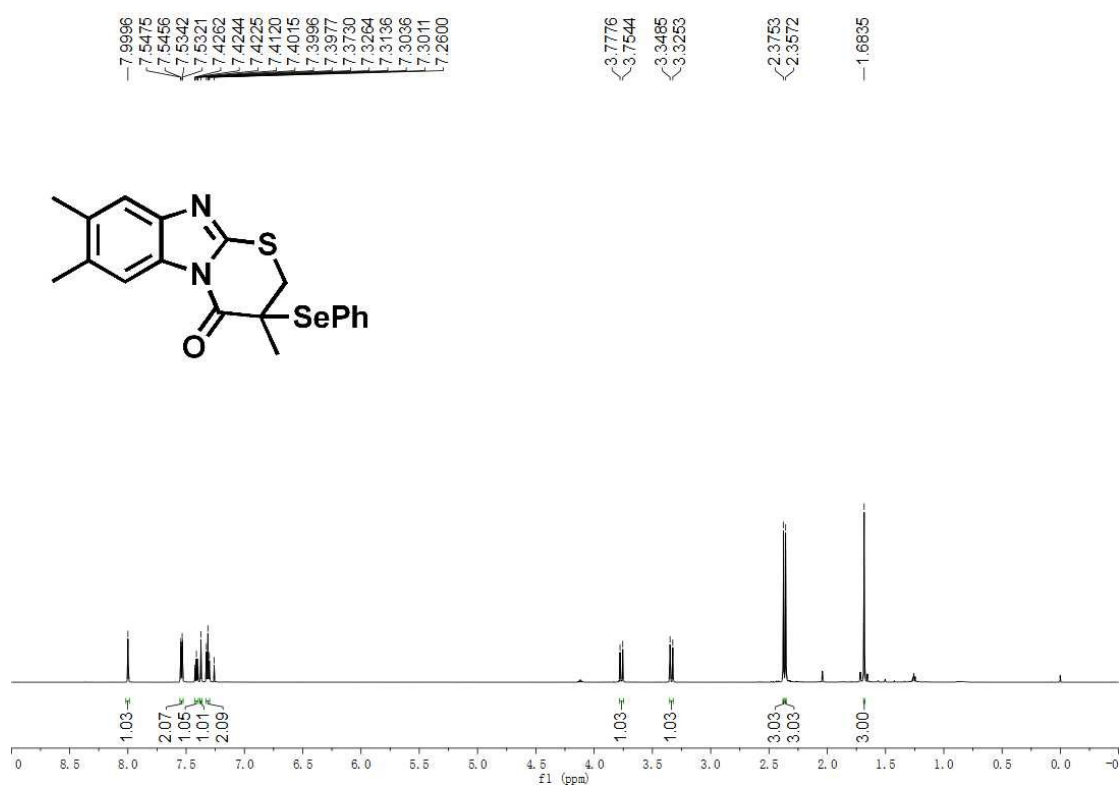

### $^{13}\text{C}$ NMR of product 5d in $\text{CDCl}_3$ (150 MHz)

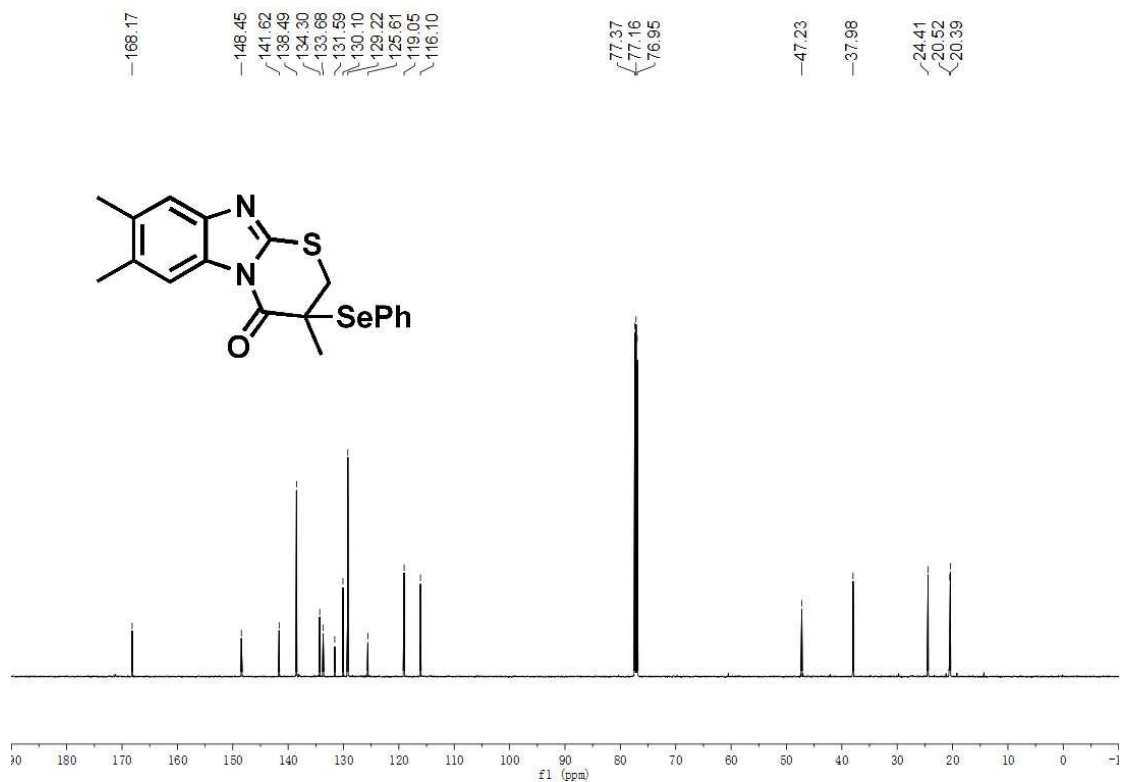

### $^1\text{H}$ NMR of product 5e in $\text{CDCl}_3$ (600 MHz)

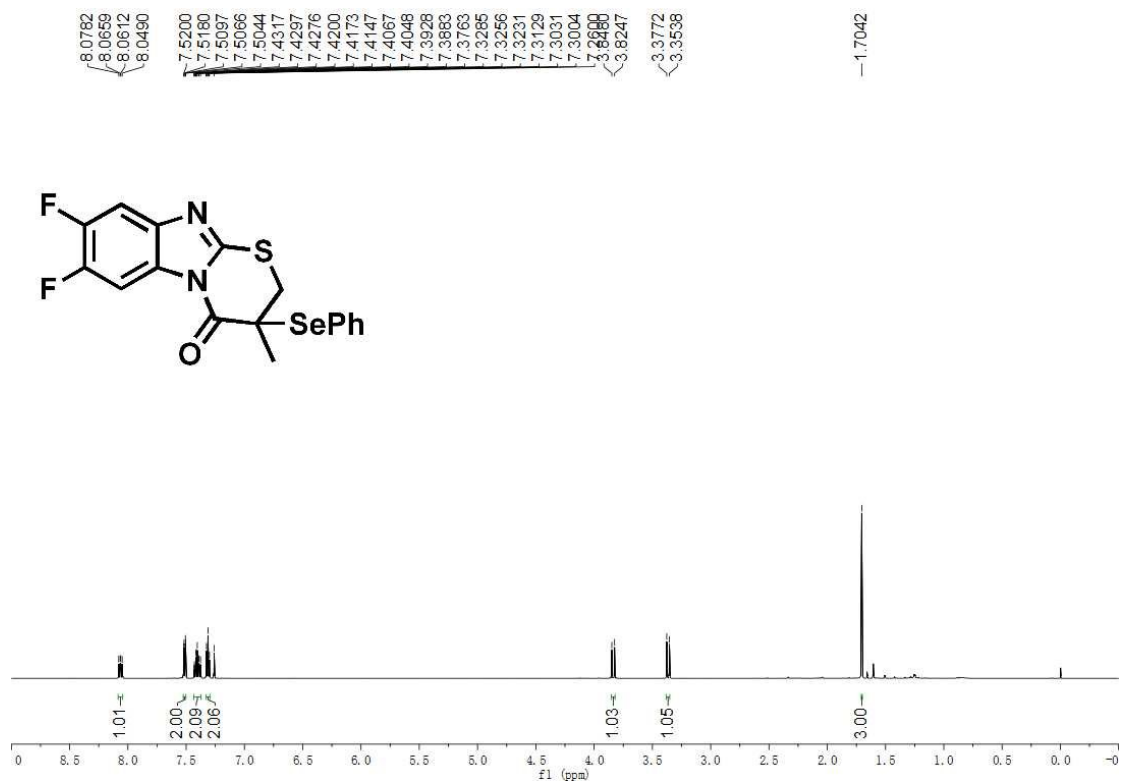

**$^{13}\text{C}$  NMR of product 5e in  $\text{CDCl}_3$  (150 MHz)**

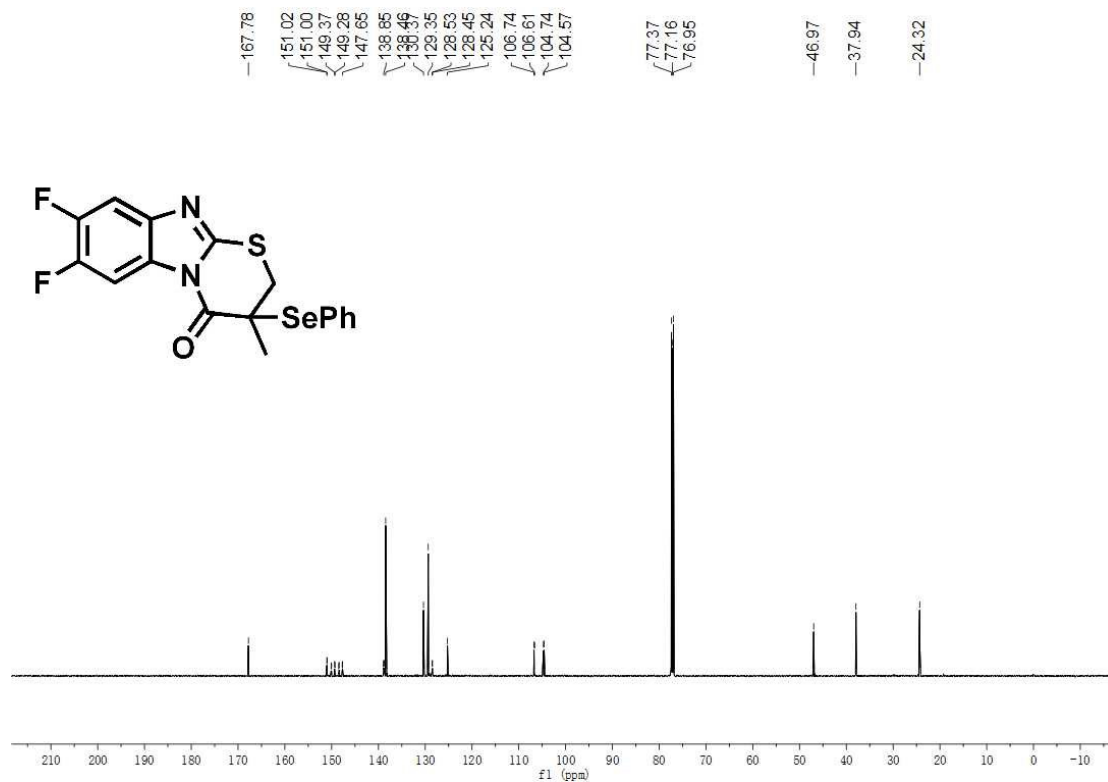

**$^{19}\text{F}$  NMR of product 5e in  $\text{CDCl}_3$  (565 MHz)**

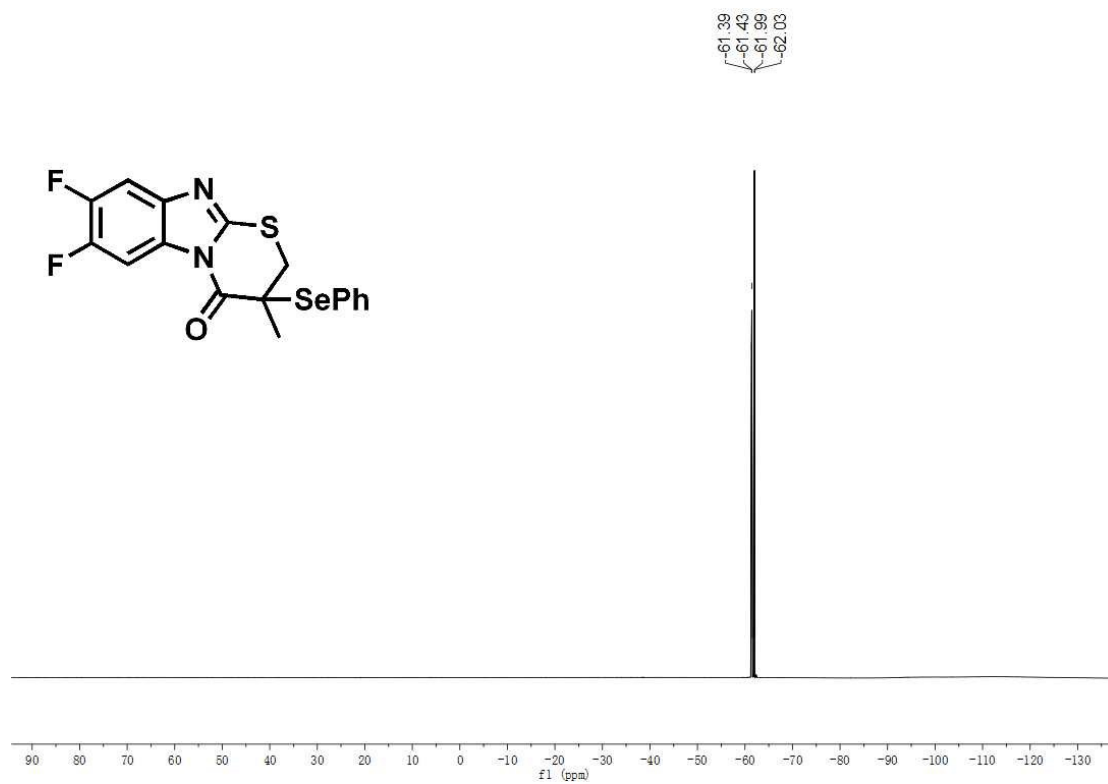

### $^1\text{H}$ NMR of product 5f in $\text{CDCl}_3$ (600 MHz)

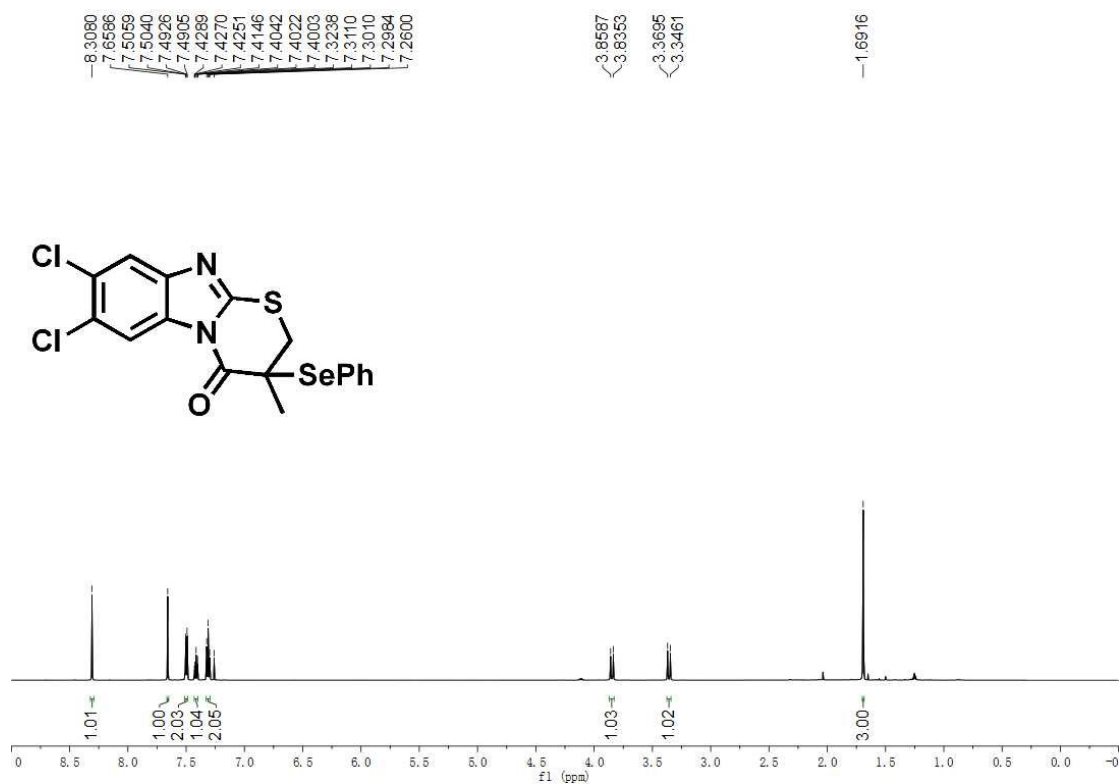

### $^{13}\text{C}$ NMR of product 5f in $\text{CDCl}_3$ (150 MHz)

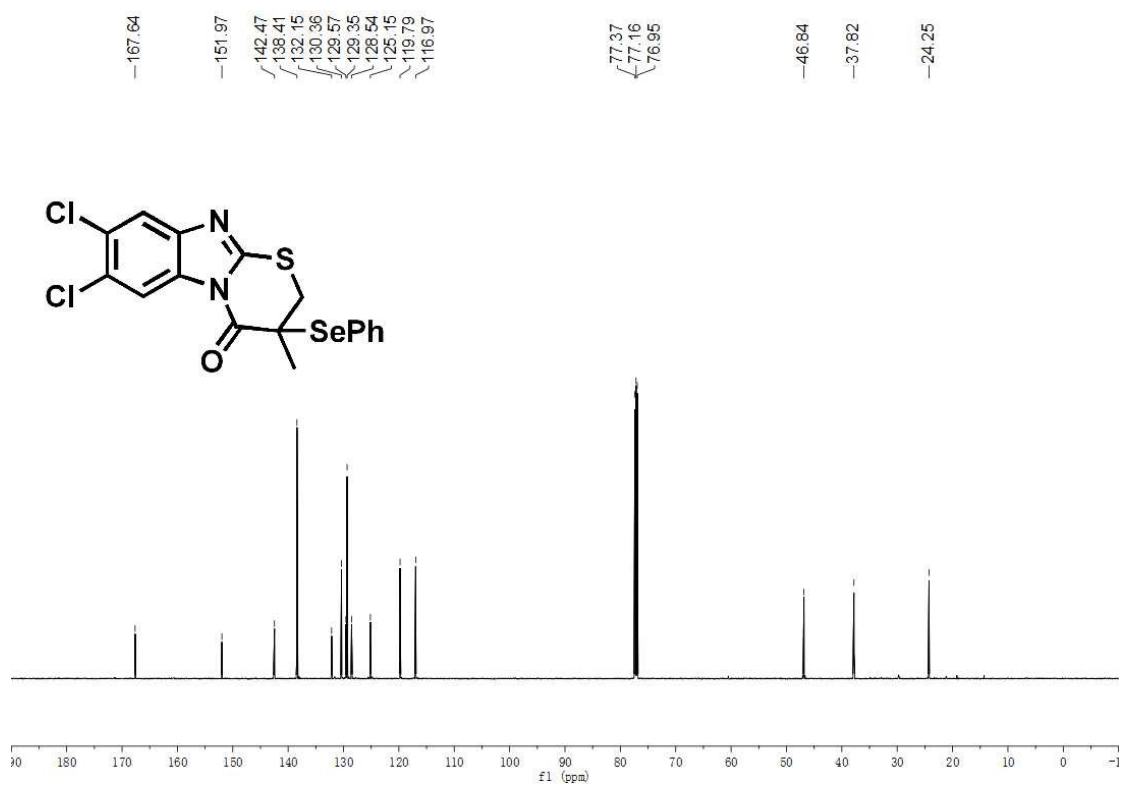

**$^1\text{H}$  NMR of product 5g in  $\text{CDCl}_3$  (600 MHz)**

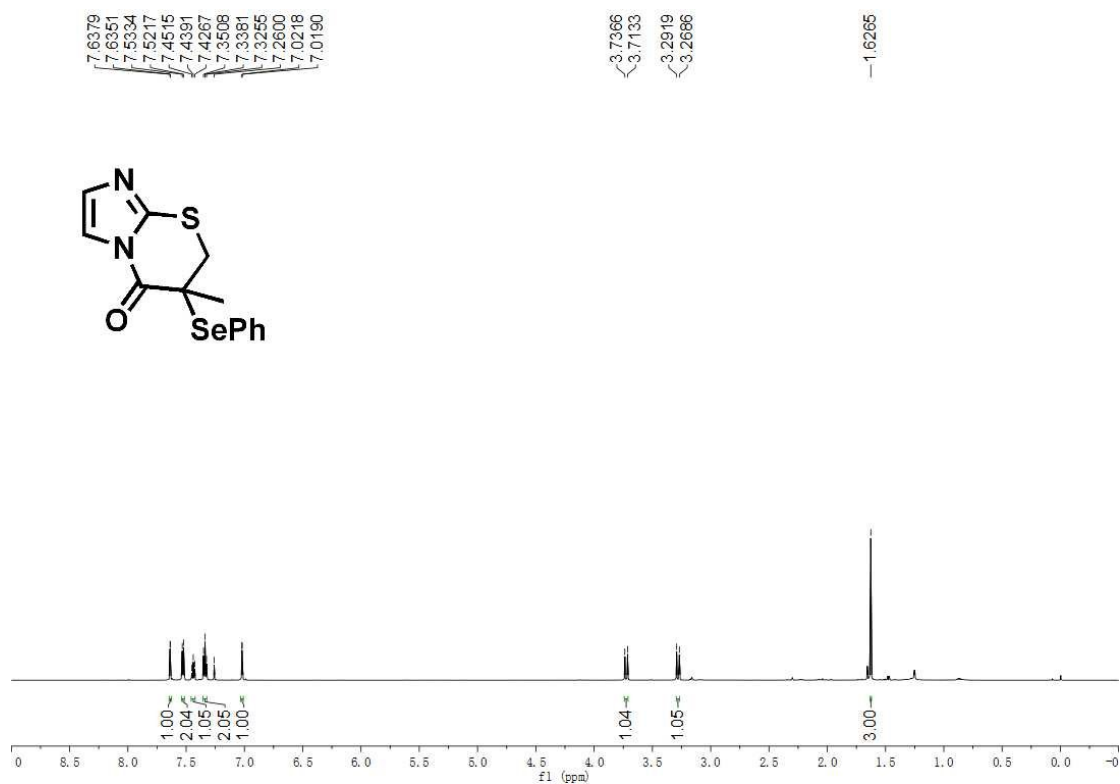

**$^{13}\text{C}$  NMR of product 5g in  $\text{CDCl}_3$  (150 MHz)**

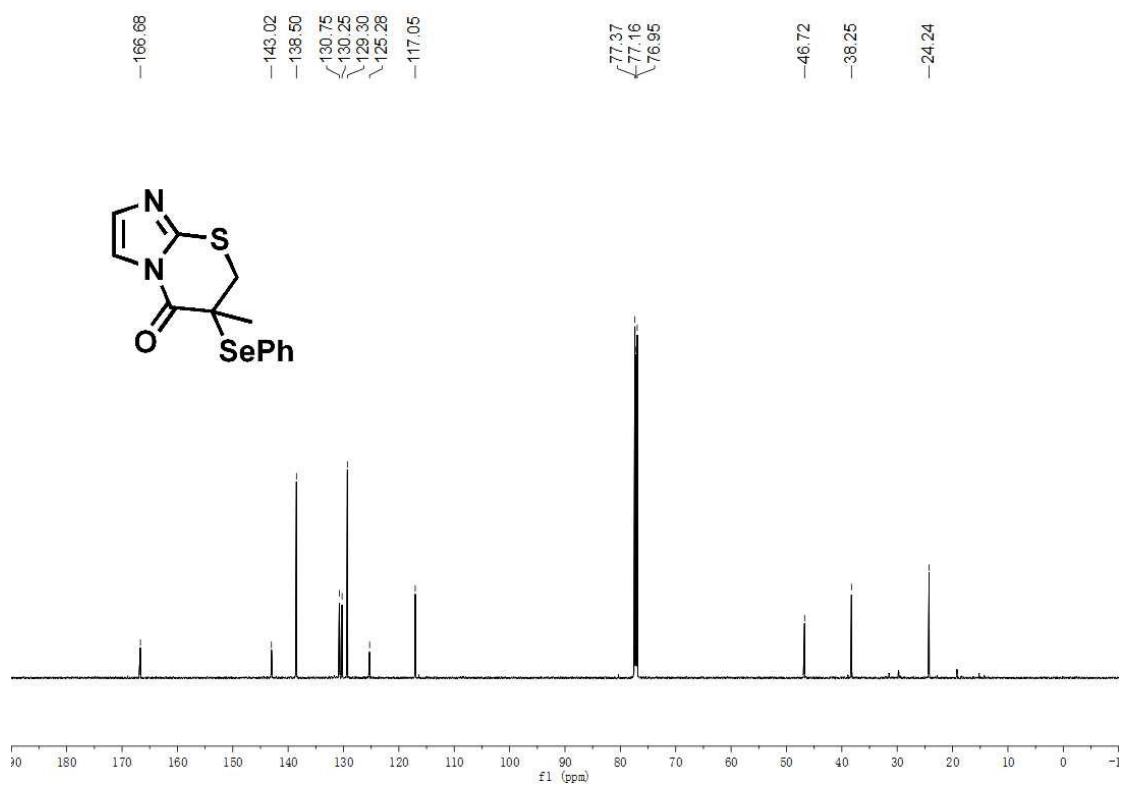

### $^1\text{H}$ NMR of product 5h in $\text{CDCl}_3$ (600 MHz)

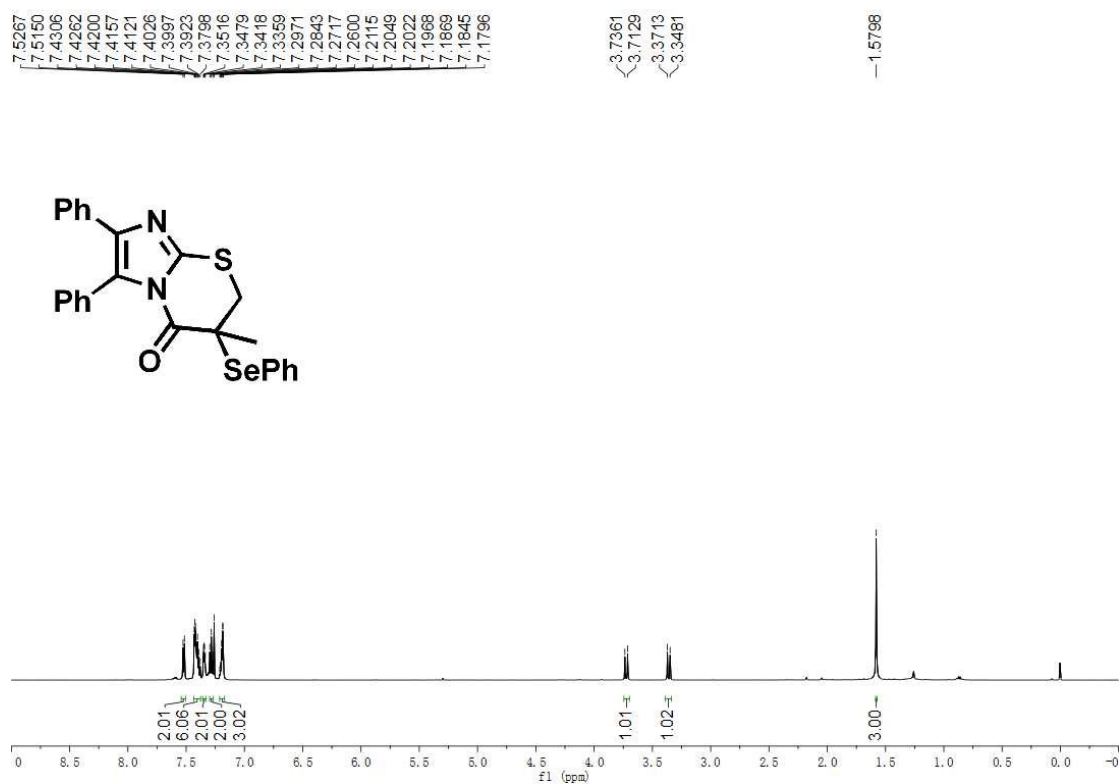

### $^{13}\text{C}$ NMR of product 5h in $\text{CDCl}_3$ (150 MHz)

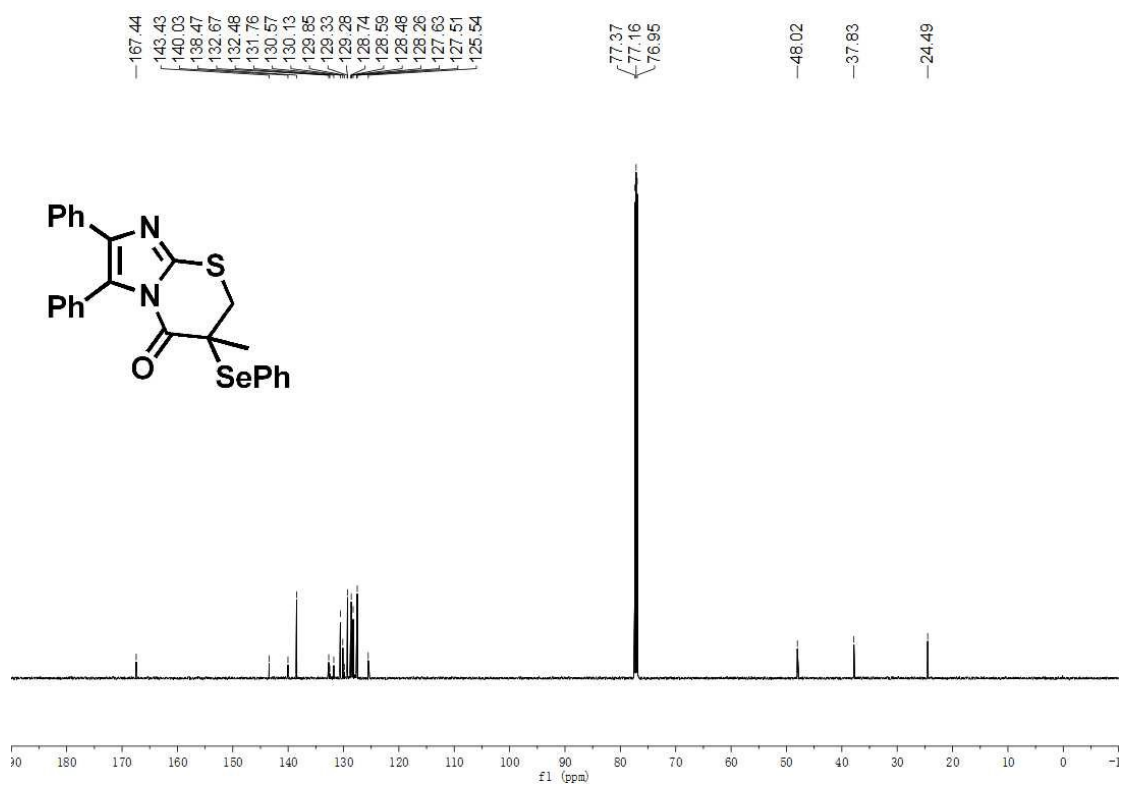



**<sup>1</sup>H NMR of product 6-d in CDCl<sub>3</sub> (600 MHz)**

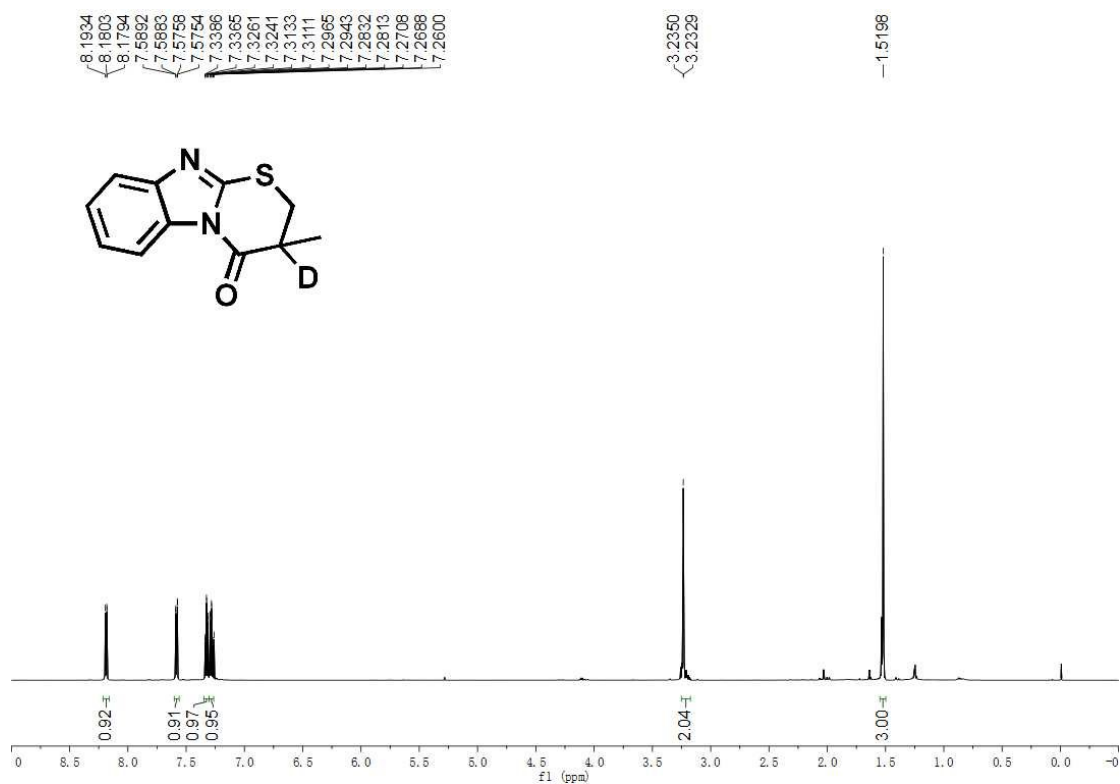

**<sup>13</sup>C NMR of product 6-d in CDCl<sub>3</sub> (150 MHz)**

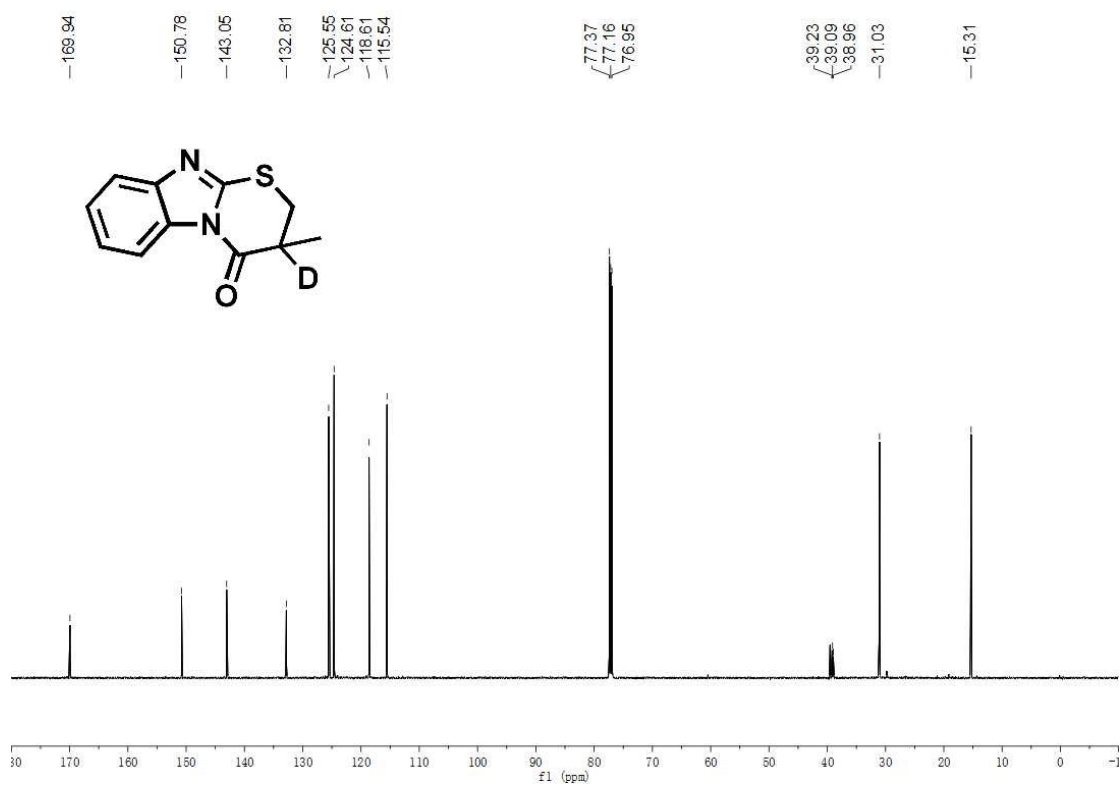

## 7. X-Ray crystallographic data for 4a (CCDC 2321470)

The suitable crystals were selected on a XtaLAB Synergy, Dualflex, HyPix diffractometer. The crystals were kept at 100.03(10) K during data collection. Using Olex2<sup>[1]</sup>, the structures were solved with the ShelXT<sup>[2]</sup> structure solution program using Intrinsic Phasing and refined with the ShelXL<sup>[3]</sup> refinement package using Least Squares minimisation.

[1] Dolomanov, O.V., Bourhis, L.J., Gildea, R.J, Howard, J.A.K. & Puschmann, H. (2009), J. Appl. Cryst. 42, 339-341.

[2] Sheldrick, G.M. (2015). Acta Cryst. A71, 3-8.

[3] Sheldrick, G.M. (2015). Acta Cryst. C71, 3-8.

Single-crystals suitable for X-ray diffraction analysis were grown from the recrystallization in EA and petroleum ether (1/1, v/v) at 25 °C. Thermal ellipsoids of the crystal structures of **4a** was set at 50%.

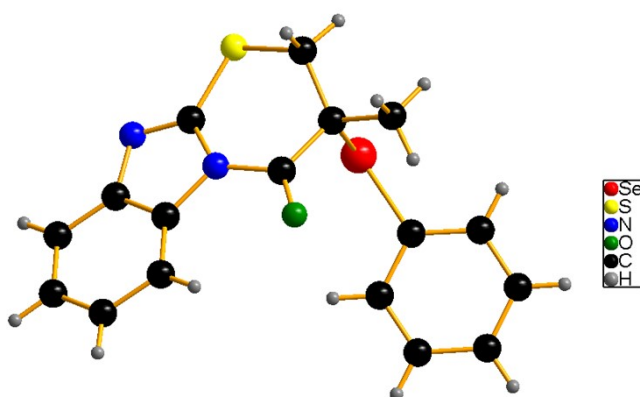

|                     |                                                     |
|---------------------|-----------------------------------------------------|
| Identification code | CCDC 2321470                                        |
| Empirical formula   | C <sub>17</sub> H <sub>14</sub> N <sub>2</sub> OSSe |
| Formula weight      | 373.32                                              |
| Temperature/K       | 296.15                                              |
| Crystal system      | orthorhombic                                        |
| Space group         | P2 <sub>1</sub> 2 <sub>1</sub> 2 <sub>1</sub>       |
| a/Å                 | 6.5195(10)                                          |
| b/Å                 | 8.3597(13)                                          |
| c/Å                 | 29.903(5)                                           |
| α/°                 | 90                                                  |
| β/°                 | 90                                                  |

|                                               |                                                               |
|-----------------------------------------------|---------------------------------------------------------------|
| $\gamma/^\circ$                               | 90                                                            |
| Volume/ $\text{\AA}^3$                        | 1629.8(4)                                                     |
| Z                                             | 4                                                             |
| $\rho_{\text{calc}}/\text{g/cm}^3$            | 1.521                                                         |
| $\mu/\text{mm}^{-1}$                          | 2.434                                                         |
| F(000)                                        | 752.0                                                         |
| Crystal size/ $\text{mm}^3$                   | $0.2 \times 0.15 \times 0.1$                                  |
| Radiation                                     | MoK $\alpha$ ( $\lambda = 0.71073$ )                          |
| $2\Theta$ range for data collection/ $^\circ$ | 5.06 to 55.134                                                |
| Index ranges                                  | $-6 \leq h \leq 8, -8 \leq k \leq 10, -35 \leq l \leq 37$     |
| Reflections collected                         | 9718                                                          |
| Independent reflections                       | 3689 [ $R_{\text{int}} = 0.0392, R_{\text{sigma}} = 0.0584$ ] |
| Data/restraints/parameters                    | 3689/0/200                                                    |
| Goodness-of-fit on $F^2$                      | 1.121                                                         |
| Final R indexes [ $I \geq 2\sigma(I)$ ]       | $R_1 = 0.0429, wR_2 = 0.0794$                                 |
| Final R indexes [all data]                    | $R_1 = 0.0564, wR_2 = 0.0822$                                 |
| Largest diff. peak/hole / $e \text{\AA}^{-3}$ | 0.45/-0.77                                                    |
